# Supplementary material for: Modeling the ACVR1R206H mutation in human skeletal muscle stem cells
Source: eLife. 2021 Nov 10;10:e66107. doi: 10.7554/eLife.66107 (PMC8691832; doi:10.7554/eLife.66107)
Supplement: Figure 5—source data 1. [file elife-66107-fig5-data1.xlsx]

## Sheet: DEips_cluster0
Cluster0	p_val	avg_logFC	pct.1	pct.2	p_val_adj	Cluster1	p_val	avg_logFC	pct.1	pct.2	p_val_adj	Cluster2	p_val	avg_logFC	pct.1	pct.2	p_val_adj	Cluster3	p_val	avg_logFC	pct.1	pct.2	p_val_adj	Cluster4	p_val	avg_logFC	pct.1	pct.2	p_val_adj
CLEC11A	2.13e-35	0.324287	0.5	0	3.94e-31	PEG3	1.01e-37	0.594413	0.684	0	1.86e-33	PEG3	6.63e-18	0.484445	0.333	0	1.23e-13	PEG3	2.39e-21	0.563722	0.636	0	4.42e-17	KCNE5	1.18e-17	1.58657	1	0.059	2.19e-13
PEG3	3.09e-32	0.44271	0.455	0	5.73e-28	TNMD	1.06e-36	0.771961	0.684	0.005	1.96e-32	CLEC11A	6.63e-18	0.354096	0.333	0	1.23e-13	TNMD	5.53e-14	0.748576	0.545	0.015	1.02e-09	PEG3	3.59e-16	0.748699	0.714	0	6.66e-12
ZP3	1.95e-20	0.325718	0.364	0.007	3.61e-16	KCNE5	4.19e-36	1.31006	0.93	0.159	7.76e-32	C19orf81	6.63e-18	0.262562	0.333	0	1.23e-13	CHCHD2	1.32e-12	0.948257	0.364	0	2.45e-08	ZP3	3.59e-16	0.367828	0.714	0	6.66e-12
CDH7	1.29e-18	0.367277	0.591	0.047	2.39e-14	LRRN1	8.24e-32	0.605898	0.772	0.062	1.53e-27	SCRIB	1.46e-13	0.325282	0.5	0.013	2.7e-09	CAMK2B	7.05e-12	0.322416	0.545	0.022	1.31e-07	CLEC11A	1.93e-11	0.337807	0.5	0	3.58e-07
FAM84A	9.04e-16	0.327893	0.318	0.01	1.67e-11	CD24	1.42e-31	0.98827	0.842	0.111	2.62e-27	MFSD2A	2.73e-12	0.263259	0.333	0.004	5.05e-08	MTRNR2L1	3.32e-10	0.281328	0.364	0.007	6.15e-06	LRRN1	3.98e-11	0.544279	0.714	0.047	7.38e-07
CYP1B1	2.84e-15	0.635048	0.818	0.14	5.26e-11	RPS4Y1	2.24e-30	-2.75257	0.018	0.986	4.15e-26	CYP1B1	1.16e-11	0.465415	0.5	0.018	2.16e-07	GABRB3	1.95e-09	0.31855	0.455	0.022	3.61e-05	FGF13	1.9e-10	0.718161	1	0.2	3.51e-06
AC090498.1	1.39e-14	1.02427	1	0.783	2.57e-10	WBP5	1.97e-28	1.03207	1	0.952	3.65e-24	KANSL1-AS1	2.44e-10	0.434911	0.5	0.022	4.51e-06	SVIL	2.06e-09	0.855288	1	0.294	3.81e-05	CAMK2B	2.54e-10	0.674429	0.929	0.153	4.7e-06
TNMD	1.46e-14	0.267318	0.273	0.007	2.71e-10	AC090498.1	3.97e-28	0.958061	1	0.788	7.35e-24	GOLGA8A	6.61e-10	0.611623	1	0.135	1.22e-05	MFSD2A	1.35e-08	0.277401	0.364	0.015	0.000249306	MYBPC1	2.7e-10	0.469313	0.643	0.035	5e-06
RPS4Y1	1.68e-14	-2.59399	0	0.98	3.12e-10	CLEC11A	1.91e-27	0.342049	0.509	0	3.53e-23	PCAT7	6.08e-09	0.400676	0.667	0.054	0.000112664	LRRN1	2.07e-08	0.291849	0.545	0.051	0.000384172	CD24	2.73e-10	0.937483	0.857	0.118	5.06e-06
POMZP3	2.21e-14	0.308761	0.364	0.02	4.09e-10	NGFRAP1	2.67e-27	1.02361	1	0.986	4.95e-23	LRRN1	1.29e-08	0.472538	0.5	0.031	0.000238564	RPS4Y1	4.65e-08	-2.57313	0	0.993	0.000862059	PMEPA1	2.94e-10	0.28136	0.714	0.059	5.44e-06
RGS16	5.52e-14	0.272361	0.409	0.03	1.02e-09	DLK1	2.87e-27	-2.35735	0.246	0.966	5.32e-23	C20orf194	9.46e-08	0.438464	0.667	0.072	0.00175321	CYP1B1	6.7e-08	0.781999	0.636	0.088	0.00124126	ACAT2	2.9e-09	0.610227	0.714	0.082	5.37e-05
RPL41	3.65e-13	0.423527	1	1	6.76e-09	RPL18A	1.45e-26	-0.411681	1	1	2.69e-22	HEXIM2	1.65e-07	0.468536	0.833	0.126	0.00305815	NGFRAP1	7.23e-08	0.906179	1	1	0.00133988	SCX	5.7e-09	0.374996	0.571	0.035	0.000105669
IGFBP2	3.77e-13	0.992319	1	0.589	6.99e-09	SVIL	1.01e-25	0.84374	0.912	0.298	1.88e-21	LITAF	2.03e-07	0.380838	0.667	0.072	0.00376291	PIP4K2A	7.39e-08	0.303195	0.545	0.051	0.0013684	ATP11B	7.65e-09	0.321325	0.643	0.059	0.000141695
TM4SF1	2.61e-12	0.454365	0.5	0.064	4.83e-08	RPS27A	2.98e-25	-0.341728	1	1	5.53e-21	LIMD1	3.36e-07	0.4419	0.5	0.04	0.00622576	AC090498.1	8.24e-08	0.992845	1	0.787	0.00152706	RPS4Y1	7.76e-09	-2.80997	0	0.965	0.00014371
RPS29	1.67e-11	0.432942	1	1	3.09e-07	RPL10	4.05e-25	-0.357998	1	1	7.5e-21	SYCE1L	5.54e-07	0.510423	0.833	0.135	0.010256	CD24	1.11e-07	0.790484	0.909	0.213	0.00206251	AC090498.1	8.6e-09	1.001	1	0.788	0.000159325
KCNE5	1.84e-11	0.699726	0.545	0.087	3.41e-07	RPS12	4.49e-25	-0.411299	1	1	8.31e-21	FAM174B	6.61e-07	0.300655	0.5	0.04	0.0122355	RPS27	1.33e-07	0.482785	1	1	0.00246118	SYNRG	8.92e-09	0.395611	0.857	0.141	0.000165258
RPS27	1.93e-11	0.436616	1	1	3.58e-07	RPL29	4.97e-25	-0.425122	1	1	9.2e-21	ADRBK2	1.28e-06	0.331328	0.5	0.045	0.0237295	MAFB	1.88e-07	0.30355	0.273	0.007	0.0034764	WBP5	8.96e-09	1.10797	1	0.941	0.000165942
RPL37A	2.9e-11	0.424505	1	1	5.37e-07	RPL37A	5.39e-25	0.388026	1	1	9.98e-21	EXOSC6	1.29e-06	0.54972	0.333	0.018	0.0239523	RPS29	2.06e-07	0.536364	1	1	0.00381525	MAP2	1.11e-08	0.382901	0.571	0.047	0.000205837
NBEAL1	3.83e-11	0.711461	1	0.91	7.09e-07	RPS23	6.34e-25	-0.344426	1	1	1.17e-20	NRCAM	1.29e-06	0.35889	0.333	0.018	0.0239523	ATP5I	2.93e-07	0.735314	1	0.956	0.00543068	CXCL12	1.36e-08	0.315288	0.5	0.024	0.000251829
PRKX	5.13e-10	0.491172	0.636	0.157	9.5e-06	RPS27	7.3e-25	0.351908	1	1	1.35e-20	HOMER1	2.57e-06	0.269464	0.5	0.045	0.0475976	PGF	2.99e-07	0.519665	0.727	0.14	0.00554438	EGFL7	1.93e-08	0.533099	0.786	0.141	0.000357942
RPL37	6.9e-10	0.387636	1	1	1.28e-05	IGFBP2	1.31e-24	0.848239	0.982	0.452	2.43e-20	FEM1A	2.81e-06	0.403719	0.5	0.049	0.0520018	MIF	3.05e-07	0.697188	1	0.993	0.00565227	CFH	1.93e-08	0.428326	0.643	0.071	0.000358196
RPL38	9.32e-10	0.381168	1	1	1.73e-05	TM4SF1	1.89e-23	0.419097	0.526	0.024	3.49e-19	HPCAL1	3.47e-06	0.428911	0.833	0.148	0.0643253	MRPL53	3.63e-07	0.312847	0.545	0.066	0.00673063	PVALB	2.02e-08	0.277845	0.357	0	0.000374593
BGN	1.36e-09	-1.03033	0.682	0.963	2.51e-05	RPL11	2.59e-23	-0.353269	1	1	4.8e-19	NCOA1	3.64e-06	0.532024	0.833	0.148	0.0673938	TXNIP	4.67e-07	-1.20094	0.636	0.985	0.00864904	COL2A1	2.24e-08	0.315614	0.429	0.012	0.000414158
DONSON	2.09e-09	0.6472	0.955	0.873	3.88e-05	ATP5E	6.6e-23	0.560642	1	0.99	1.22e-18	RP11-61K9.3	4.5e-06	0.422918	0.5	0.054	0.0834298	IGFBP2	4.75e-07	0.938362	1	0.662	0.0088051	POMZP3	4.43e-08	0.342416	0.643	0.071	0.000819839
RPL34	3.16e-09	0.378106	1	1	5.85e-05	RPS24	8.02e-23	-0.348602	1	1	1.49e-18	HEG1	5.39e-06	0.300633	0.5	0.049	0.099802	WBP5	5.44e-07	0.932353	1	0.956	0.0100834	PRKX	5.36e-08	0.573112	0.929	0.2	0.00099334
RPS26	5.45e-09	0.314892	1	1	0.000101018	MT-ND3	1.18e-22	0.813484	1	0.909	2.19e-18	CD24	7.58e-06	0.713146	0.667	0.103	0.140401	RPL37A	6.11e-07	0.432555	1	1	0.0113166	DONSON	5.62e-08	0.759867	1	0.882	0.00104137
CSRP2	7.74e-09	-0.919272	0.636	0.957	0.000143387	RPS18	1.77e-22	-0.319207	1	1	3.28e-18	PIP4K2A	8.21e-06	0.324476	0.667	0.085	0.152153	TET2	6.14e-07	0.390822	0.727	0.132	0.0113684	USMG5	7.52e-08	0.831071	1	0.918	0.00139221
ZNF280D	7.91e-09	0.328347	0.409	0.064	0.000146433	TXNIP	1.9e-22	-1.17315	0.825	0.981	3.51e-18	KMT2D	1.04e-05	0.310688	0.333	0.022	0.193386	RPL38	7.67e-07	0.368354	1	1	0.0142094	UQCRQ	7.54e-08	0.851791	1	0.941	0.00139685
RPL10	1.09e-08	-0.277904	1	1	0.000201928	C6orf48	2.08e-22	-0.783838	1	0.995	3.86e-18	PLK2	1.09e-05	0.603844	0.667	0.103	0.201745	IGFN1	8.09e-07	0.302911	0.545	0.066	0.0149951	RPL37A	9.43e-08	0.369816	1	1	0.00174771
RPL17	1.25e-08	0.515975	1	0.993	0.000232205	RPS29	3.53e-22	0.370968	1	1	6.53e-18	RP11-538P18.2	1.15e-05	0.36447	0.333	0.022	0.212967	PUM3	8.3e-07	0.360333	0.909	0.243	0.015368	RPS24	9.43e-08	-0.443661	1	1	0.00174771
PPIL3	2.11e-08	0.407372	0.727	0.247	0.00039004	RPS14	4.03e-22	-0.300676	1	1	7.46e-18	SPDL1	1.17e-05	0.270432	0.5	0.054	0.217023	KCNE5	9.02e-07	0.753216	0.818	0.235	0.0167067	NGFRAP1	1.11e-07	1.15138	1	0.988	0.00206259
DLK1	2.16e-08	-1.60603	0.364	0.93	0.00040094	ADI1	5.26e-22	0.641085	0.912	0.327	9.74e-18	SLC25A4	1.23e-05	0.421273	0.667	0.112	0.228369	GATM	1.1e-06	0.472863	0.909	0.243	0.0203295	RPL18A	1.18e-07	-0.488467	1	1	0.00217926
PGF	2.26e-08	0.436474	0.5	0.104	0.000418276	RPL13A	5.57e-22	-0.272792	1	1	1.03e-17	PPM1F	2.32e-05	0.28909	0.5	0.058	0.429194	HECTD4	1.21e-06	0.277823	0.545	0.074	0.0223522	TCEAL8	1.53e-07	0.774057	1	0.894	0.00283504
NGFRAP1	2.43e-08	0.818511	1	1	0.000450614	PEG10	1.39e-21	0.996667	1	0.913	2.57e-17	RPS29	2.99e-05	0.563584	1	1	0.553306	ATP5E	1.3e-06	0.522724	1	1	0.0239916	DYNC1I1	1.67e-07	0.251999	0.5	0.035	0.00309377
C6orf48	2.6e-08	-0.670694	1	0.993	0.000482481	MIF	1.43e-21	0.830757	1	0.966	2.65e-17	FAM217B	3.27e-05	0.382358	0.833	0.184	0.605319	LIMCH1	1.37e-06	0.377332	0.455	0.051	0.0253294	TTN	1.92e-07	1.29572	1	0.388	0.00355442
HNRNPA1L2	2.91e-08	0.504368	0.773	0.324	0.000539707	MT-ND4L	1.71e-21	0.82029	1	0.87	3.17e-17	AC090498.1	3.32e-05	1.03626	1	0.744	0.614872	RPL36A	1.39e-06	0.442832	1	1	0.0258341	RPS13	1.92e-07	-0.401058	1	1	0.00356007
HPCAL1	3.24e-08	0.34008	0.5	0.097	0.000600226	RPL13	4.08e-21	-0.26094	1	1	7.56e-17	RPL41	3.42e-05	0.443806	1	1	0.634337	SP5	1.43e-06	0.30758	0.636	0.103	0.0264241	RPS12	2.03e-07	-0.477903	1	1	0.00375777
RPS28	5.19e-08	0.347211	1	1	0.000961063	RPL27A	4.92e-21	-0.284473	1	1	9.11e-17	RPL37A	3.52e-05	0.464477	1	1	0.651839	FBXO28	1.6e-06	0.2701	0.636	0.11	0.0296236	CREG1	2.11e-07	0.453918	0.786	0.153	0.00391485
RPL18A	5.55e-08	-0.288568	1	1	0.00102745	MYEOV2	5.58e-21	0.659778	1	0.76	1.03e-16	DCAF12	3.54e-05	0.290908	0.5	0.063	0.656456	STK26	2.21e-06	0.307263	0.727	0.147	0.0410204	RPL10	2.14e-07	-0.464761	1	1	0.00396605
MT-ND3	5.93e-08	0.825135	1	0.853	0.00109923	ACAT2	9.19e-21	0.437056	0.649	0.087	1.7e-16	RPS27	3.72e-05	0.423822	1	1	0.688235	ZNF280D	2.69e-06	0.270936	0.545	0.081	0.0498478	EIF5B	2.32e-07	0.591004	1	0.588	0.00429989
SULT1A1	7.06e-08	0.402647	0.682	0.204	0.00130767	RPL14	1.05e-20	-0.31649	1	1	1.94e-16	RPS28	3.72e-05	0.616578	1	1	0.688238	RPL37	2.89e-06	0.405055	1	1	0.0535227	LINC01116	2.88e-07	0.279296	0.429	0.024	0.00533426
RPL35A	7.63e-08	0.255747	1	1	0.00141304	RPL28	1.22e-20	-0.300423	1	1	2.25e-16	RPS4Y1	4.14e-05	-2.81268	0	0.982	0.766337	METAP2	2.97e-06	0.536754	1	0.831	0.0550526	RNF187	3.08e-07	0.383463	0.786	0.165	0.00570093
C14orf2	8.15e-08	0.469063	1	0.97	0.00150894	DONSON	2.14e-20	0.711976	1	0.88	3.97e-16	NAT10	5.06e-05	0.280896	0.5	0.063	0.936912	MYEOV2	3.43e-06	0.554674	1	0.831	0.0635325	MT-ND4L	3.13e-07	0.856399	1	0.824	0.00580601
RPL29	9.42e-08	-0.292196	1	1	0.00174442	PVALB	3.36e-20	0.305562	0.456	0.019	6.22e-16	CDC42BPB	5.36e-05	0.283581	0.5	0.063	0.993514	EIF5A	3.61e-06	0.742378	1	0.559	0.0668782	POMP	3.45e-07	0.693374	1	0.929	0.00639795
MIF	9.52e-08	0.798489	1	0.946	0.00176426	RPS3	3.44e-20	-0.282724	1	1	6.38e-16	TOLLIP-AS1	6.13e-05	0.347906	0.5	0.072	1	RPS28	3.84e-06	0.332613	1	1	0.071209	RPS16	3.46e-07	-0.333286	1	1	0.00641661
MT-ND1	1.06e-07	0.699709	1	0.977	0.00196239	RPL10A	3.7e-20	-0.292669	1	1	6.86e-16	CREBBP	6.27e-05	0.370675	0.833	0.184	1	TMEM176B	3.91e-06	0.276737	0.364	0.029	0.0724067	MMAB	3.67e-07	0.498497	1	0.294	0.00680245
TMEM258	1.21e-07	0.553598	0.955	0.967	0.00223491	GATM	3.79e-20	0.647694	0.825	0.231	7.02e-16	PTPRK	6.49e-05	0.292476	0.5	0.067	1	RPL41	3.98e-06	0.353817	1	1	0.073779	SRP14	3.85e-07	0.520948	1	1	0.007133
SPARC	1.69e-07	-0.650299	0.909	0.997	0.00313119	RPS9	4.05e-20	-0.288678	1	1	7.51e-16	RPL37	6.69e-05	0.390658	1	1	1	RPS13	4.43e-06	-0.333171	1	1	0.0820332	ADI1	4e-07	0.759048	1	0.588	0.0074132
BDH1	1.9e-07	0.275069	0.636	0.164	0.00351432	RPS13	4.36e-20	-0.313042	1	1	8.07e-16	MFSD11	7.6e-05	0.303501	0.667	0.117	1	GOLGA8B	4.47e-06	0.468458	0.818	0.228	0.0827988	RPS26	4.06e-07	0.385029	1	1	0.00751955
MFAP4	1.97e-07	-0.799435	1	0.99	0.00365296	COX6C	6.6e-20	0.58464	1	0.976	1.22e-15	VPS13A	7.64e-05	0.318666	0.5	0.072	1	RP11-71N10.1	5.01e-06	0.370641	0.545	0.103	0.0927308	RPL29	4.28e-07	-0.463071	1	1	0.00792627
RPL39	2e-07	0.313281	1	1	0.00370008	RPS2	6.6e-20	-0.282843	1	1	1.22e-15	ACAT2	7.68e-05	0.294064	0.5	0.067	1	DLK1	5.14e-06	-1.72471	0.364	0.949	0.095201	RPS23	5.01e-07	-0.32862	1	1	0.00927782
MT-ND4L	2.05e-07	0.810754	0.864	0.776	0.00380364	TMA7	6.85e-20	0.581991	1	0.981	1.27e-15	STARD13	8.07e-05	0.430565	0.5	0.072	1	C6orf48	6.28e-06	-0.758216	1	1	0.116423	KIF1A	5.12e-07	0.820355	0.929	0.329	0.00947998
EIF5A	2.13e-07	0.475365	0.727	0.321	0.00394385	ITM2C	7.01e-20	0.714441	0.895	0.375	1.3e-15	RPL38	8.46e-05	0.407397	1	1	1	MT-ND3	6.97e-06	0.764726	1	0.978	0.129175	NDUFA3	5.27e-07	0.671822	1	0.706	0.00975934
RPL36A	2.18e-07	0.432749	1	1	0.0040465	RPL19	7.77e-20	-0.269577	1	1	1.44e-15	AKR1C2	9.05e-05	0.402422	0.833	0.22	1	RPS26	7.73e-06	0.547884	1	1	0.143279	TNMD	5.33e-07	0.433377	0.357	0.012	0.00986732
RPS21	2.89e-07	0.32905	1	1	0.00535157	TCEAL4	1.26e-19	0.652693	1	0.779	2.33e-15	HMGB3	9.38e-05	0.682717	1	0.561	1	EIF2S1	8.16e-06	0.4831	0.909	0.368	0.151153	RPS28	5.56e-07	0.419781	1	1	0.0102996
WBP5	3e-07	0.711762	1	0.977	0.00555759	SMARCA1	1.66e-19	0.721191	0.912	0.447	3.07e-15	RPL34	0.000115263	0.300967	1	1	1	POLA1	9.59e-06	0.333186	0.727	0.199	0.177682	RPL28	6.17e-07	-0.405662	1	1	0.0114294
LUM	3.17e-07	-1.07401	0.318	0.896	0.00587107	RPL41	1.88e-19	0.274973	1	1	3.49e-15	LBH	0.000124111	0.294755	0.5	0.072	1	MT-ND4L	9.79e-06	0.781053	1	0.919	0.181329	ATP5I	6.49e-07	0.769622	1	0.953	0.0120286
CD24	3.51e-07	0.647403	0.591	0.164	0.00650317	UQCRQ	2.02e-19	0.625761	0.982	0.923	3.74e-15	PCGF6	0.000130875	0.284181	0.5	0.072	1	TMA7	1.02e-05	0.498877	1	0.985	0.188409	RPL13	7.21e-07	-0.368079	1	1	0.0133509
PLP1	4.36e-07	0.272128	0.273	0.033	0.00807042	UQCR10	2.13e-19	0.602288	1	0.923	3.95e-15	TP53	0.000138276	0.42679	0.667	0.135	1	UQCRQ	1.25e-05	0.507442	1	0.963	0.230776	ENPP6	7.38e-07	0.297447	0.5	0.047	0.0136796
COX7A2	4.83e-07	0.465508	1	0.98	0.00894568	RPS19	2.19e-19	-0.29666	1	1	4.06e-15	ADAM19	0.000140962	0.425549	0.5	0.076	1	ROMO1	1.41e-05	0.626371	1	0.757	0.26106	RPS27	7.99e-07	0.368955	1	1	0.0148009
PRDM6	5.25e-07	0.298191	0.5	0.12	0.00973089	NDUFA3	2.51e-19	0.594406	0.982	0.611	4.66e-15	GATM	0.000162694	0.401447	0.667	0.135	1	PEG10	1.58e-05	0.772876	1	0.963	0.291823	GATM	9.45e-07	0.617917	0.929	0.318	0.0175055
PEG10	6.12e-07	0.865721	1	0.87	0.0113335	RPLP1	2.76e-19	-0.278528	1	1	5.11e-15	HCG18	0.000166821	0.304821	0.667	0.121	1	PI4KB	1.61e-05	0.271242	0.636	0.132	0.297365	WASH1	1.09e-06	0.27683	0.714	0.118	0.0201306
RPSA	6.18e-07	-0.274447	1	1	0.0114567	CAMK2B	4.48e-19	0.549069	0.561	0.067	8.31e-15	PTGFRN	0.000168218	0.34716	0.833	0.202	1	HNRNPM	1.63e-05	0.631776	1	0.765	0.30157	SLIRP	1.17e-06	0.656841	1	0.718	0.0217628
DNAJC15	6.69e-07	-0.52535	0	0.609	0.0124005	COX7A2	5.59e-19	0.552761	1	0.986	1.04e-14	CNOT11	0.000170229	0.268836	0.5	0.072	1	DHCR7	1.76e-05	0.325289	0.545	0.103	0.326878	TMEM173	1.18e-06	0.265404	0.643	0.094	0.0217738
SVIL	6.91e-07	0.640256	0.773	0.318	0.0127976	RPL37	6.66e-19	0.276938	1	1	1.23e-14	GON4L	0.000183882	0.359606	1	0.305	1	RPL34	1.99e-05	0.306473	1	1	0.368213	MT-ND3	1.19e-06	0.859598	1	0.906	0.0221284
ID1	8.57e-07	0.782639	0.818	0.401	0.0158702	RPS10	7.02e-19	-0.352325	1	1	1.3e-14	RPL29	0.000185975	-0.331269	1	1	1	BMPR2	2.01e-05	0.328089	0.818	0.25	0.371726	RPS27A	1.33e-06	-0.342701	1	1	0.0246405
COL1A1	1.08e-06	-0.339792	1	1	0.0200675	FHL2	7.04e-19	0.494554	0.702	0.144	1.3e-14	ZNF124	0.000188891	0.264043	0.5	0.072	1	GLI3	2.07e-05	0.305715	0.455	0.066	0.383599	NEB	1.4e-06	0.607218	1	0.988	0.0259151
RPIA	1.28e-06	0.265663	0.682	0.217	0.0236206	RPL32	9.21e-19	-0.252328	1	1	1.71e-14	TMEM38B	0.000197191	0.30356	0.667	0.121	1	EIF5B	2.27e-05	0.616493	1	0.765	0.420329	RPS29	1.47e-06	0.340045	1	1	0.027253
RPS12	1.34e-06	-0.258575	1	1	0.0249104	UBL5	1.2e-18	0.596029	1	0.923	2.22e-14	RPL18A	0.000221075	-0.28274	1	1	1	PROX1	2.46e-05	0.331869	0.545	0.096	0.456218	RPS18	1.55e-06	-0.357364	1	1	0.028655
ANXA1	1.51e-06	-0.790218	0.227	0.722	0.0279745	ATP5I	1.42e-18	0.62278	1	0.909	2.62e-14	HNRNPA1L2	0.000236901	0.549695	1	0.35	1	CD82	2.53e-05	0.291024	0.636	0.132	0.467869	C6orf48	1.55e-06	-0.678438	1	1	0.0286571
STAG2	1.52e-06	0.595814	0.909	0.508	0.0281763	EIF5A	1.49e-18	0.561515	0.912	0.38	2.76e-14	UBA1	0.000242656	0.377318	0.667	0.135	1	MZT2B	2.63e-05	-0.610201	0.909	0.993	0.486442	C14orf2	1.63e-06	0.528477	1	1	0.0301285
HIST1H4C	1.62e-06	0.579424	0.955	0.722	0.0299169	TFF3	1.98e-18	0.29808	0.404	0.014	3.67e-14	RPL11	0.000249855	-0.292036	1	1	1	EIF4G2	3.01e-05	0.554496	1	0.89	0.557439	SLITRK4	1.73e-06	0.309523	0.429	0.035	0.0320936
PITX2	2.04e-06	-0.679286	0.682	0.936	0.037721	RPL7A	2.97e-18	-0.264075	1	1	5.5e-14	RPL27A	0.000249856	-0.274678	1	1	1	PRR14L	3.01e-05	0.368186	0.727	0.213	0.558273	SNCA	1.93e-06	0.565987	0.857	0.282	0.035664
COX6C	2.49e-06	0.469961	1	0.987	0.0460548	NEB	4.43e-18	0.637691	1	0.938	8.2e-14	RBL2	0.000295674	0.418288	0.667	0.152	1	COX6C	3.24e-05	0.476765	1	0.978	0.600334	ITGB1	1.93e-06	0.619761	1	0.588	0.0357321
AP2M1	2.6e-06	-0.543033	0.818	0.953	0.0481585	COL2A1	6.94e-18	0.282002	0.333	0	1.29e-13	RPL17	0.000318261	0.528709	1	0.991	1	COX7C	3.24e-05	0.349457	1	1	0.600365	NRCAM	1.97e-06	0.265215	0.5	0.059	0.0365325
NKIRAS2	2.97e-06	0.290511	0.818	0.321	0.0550105	TCEAL8	7.15e-18	0.683963	1	0.913	1.32e-13	MRS2	0.000329417	0.341071	0.667	0.148	1	NDUFA3	3.62e-05	0.500463	1	0.691	0.670099	RPL11	2.09e-06	-0.333472	1	1	0.0386597
FAM229B	3.09e-06	-0.491775	0.273	0.779	0.057173	RPL8	8.01e-18	-0.281962	1	1	1.48e-13	ZFHX4	0.00034784	0.554833	1	0.354	1	TCEAL8	3.89e-05	0.646822	1	0.89	0.720839	AKR1C2	2.15e-06	0.29611	0.5	0.059	0.0398752
CHCHD10	3.74e-06	-0.591029	0.045	0.602	0.0691932	ATP5J2	8.59e-18	0.64764	1	0.861	1.59e-13	RRP15	0.000391727	0.320745	0.667	0.139	1	RFC3	4.25e-05	0.516947	0.818	0.404	0.787485	YBX3	2.41e-06	0.66412	1	0.918	0.0446642
KIF1A	3.92e-06	0.47419	0.773	0.351	0.072567	CYP1B1	1.62e-17	0.361385	0.404	0.019	2.99e-13	PPHLN1	0.000405945	0.508356	1	0.39	1	NRCAM	4.3e-05	0.341738	0.273	0.022	0.795678	RPL23A	2.42e-06	-0.320226	1	1	0.0448437
SUZ12	4.04e-06	0.253227	0.591	0.184	0.0748198	TMEM52	1.79e-17	0.30191	0.368	0.01	3.31e-13	VPS13D	0.000406152	0.322619	0.333	0.036	1	COL1A1	4.32e-05	-0.977899	1	1	0.800546	BRMS1L	2.69e-06	0.268257	0.571	0.094	0.049919
SPRY1	5.09e-06	0.480863	0.682	0.318	0.0942229	RPS28	1.99e-17	0.316018	1	1	3.69e-13	ZW10	0.000406152	0.299849	0.333	0.036	1	EMC10	4.54e-05	0.450533	0.909	0.382	0.841865	SON	2.77e-06	0.566928	1	0.753	0.051394
UQCR10	5.19e-06	0.442123	1	0.89	0.0961143	USMG5	2.34e-17	0.625076	0.982	0.928	4.33e-13	TPPP3	0.000406712	0.750911	0.833	0.296	1	JPX	4.71e-05	0.511373	0.818	0.39	0.872038	GPM6B	2.84e-06	0.675632	1	0.682	0.0526193
EEF1D	5.56e-06	-0.308267	1	1	0.10291	RPL5	3.41e-17	-0.262104	1	1	6.31e-13	ODC1	0.000413276	0.657525	1	0.48	1	B2M	4.75e-05	-0.737207	1	0.985	0.880296	RPL14	2.95e-06	-0.401204	1	1	0.05458
PRKCB	5.83e-06	0.352333	0.727	0.274	0.108045	PITX2	4.91e-17	-0.683479	0.93	0.99	9.09e-13	ZCCHC24	0.000438641	0.294303	0.667	0.139	1	NBL1	4.84e-05	0.27513	0.727	0.206	0.896475	LDLR	3.05e-06	0.26652	0.5	0.059	0.0564266
ATP5I	6.1e-06	0.48487	1	0.9	0.112908	RPL23A	5.25e-17	-0.273162	1	1	9.72e-13	STAG2	0.000478428	0.713238	1	0.462	1	TNNI1	4.93e-05	0.643979	0.818	0.346	0.914029	HNRNPA3	3.21e-06	0.584446	1	0.882	0.059489
RPS10	6.22e-06	-0.286123	1	1	0.115185	RPS16	6.51e-17	-0.272936	1	1	1.21e-12	MID1IP1	0.000479445	0.447568	0.667	0.179	1	SLC38A1	4.97e-05	0.542979	0.909	0.404	0.920018	PGF	3.22e-06	0.597067	0.929	0.271	0.0596608
GABPB1-AS1	7e-06	0.651259	0.909	0.635	0.129661	ZNF667-AS1	1.07e-16	0.326428	0.526	0.067	1.98e-12	EMC10	0.000486531	0.485689	1	0.399	1	MCM10	5.12e-05	0.423379	0.909	0.338	0.947588	RPL13A	3.25e-06	-0.349864	1	1	0.0601793
PDLIM2	7.24e-06	-0.5595	0.364	0.769	0.134201	MINOS1	1.12e-16	0.526441	0.965	0.736	2.07e-12	PEG10	0.000517816	0.826028	1	0.883	1	RPL29	5.22e-05	-0.312153	1	1	0.967572	ID1	3.37e-06	0.89023	1	0.553	0.0623643
TCEAL4	7.29e-06	0.510923	0.955	0.819	0.135129	MORF4L2	1.12e-16	0.701892	1	0.942	2.07e-12	C4orf46	0.000535184	0.287506	0.5	0.085	1	RPL18A	5.22e-05	-0.320927	1	1	0.967572	SURF6	3.42e-06	0.270584	0.714	0.141	0.063409
TAGLN	7.37e-06	-1.15683	0.591	0.91	0.136517	TTN	1.25e-16	0.683108	0.456	0.043	2.32e-12	PDGFA	0.000559994	0.375235	0.5	0.085	1	BGN	5.32e-05	-0.884572	0.545	0.912	0.985247	RPL27	3.58e-06	-0.299085	1	1	0.0663271
SPARCL1	7.57e-06	0.28203	0.727	0.251	0.140204	SNHG8	1.63e-16	-0.75472	0.947	0.99	3.02e-12	PRKX	0.000565703	0.409038	0.5	0.094	1	MT-ND1	5.74e-05	0.539111	1	0.993	1	RPL19	3.94e-06	-0.300805	1	1	0.0730746
RBBP7	7.73e-06	0.476505	0.773	0.478	0.143211	EMC10	1.73e-16	0.63856	0.877	0.38	3.21e-12	RPL39	0.000586883	0.262374	1	1	1	PABPC1	5.92e-05	0.3694	1	1	1	ROMO1	4.06e-06	0.689407	1	0.647	0.0751382
PTMA	7.95e-06	0.353603	1	1	0.147305	SUMO2	1.86e-16	0.423497	1	1	3.45e-12	BGN	0.000600823	-1.06833	0.167	0.865	1	RPL10A	5.92e-05	-0.259425	1	1	1	SMARCA1	4.17e-06	0.60906	1	0.506	0.0772946
EGFL7	8.58e-06	0.471242	0.591	0.204	0.158961	TPM1	2.45e-16	0.803111	0.93	0.707	4.53e-12	UQCR10	0.000610953	0.664779	1	0.83	1	TSC22D1	6.16e-05	0.506739	0.909	0.493	1	UGP2	4.23e-06	0.68474	1	0.518	0.0783373
DCN	9.18e-06	-0.580919	0.909	1	0.170138	C14orf2	2.57e-16	0.495991	1	0.966	4.76e-12	ATP5E	0.000614537	0.504408	1	0.996	1	COL3A1	6.92e-05	-0.768069	1	0.993	1	RPS14	4.34e-06	-0.331008	1	1	0.0804774
TXNIP	9.6e-06	-0.608263	0.909	0.98	0.177792	IGF2	3.5e-16	-0.618346	1	1	6.48e-12	ZBTB44	0.000635505	0.379922	0.667	0.184	1	SNRPF	7.13e-05	0.569344	1	0.956	1	SDCBP	4.37e-06	0.660424	1	0.729	0.0809769
ZNF90	9.79e-06	0.457994	0.864	0.625	0.181364	AKAP12	4.03e-16	0.604607	0.912	0.413	7.46e-12	STAC3	0.000641019	0.540108	0.833	0.265	1	POLA2	7.2e-05	0.381436	0.727	0.213	1	CHRNA1	4.93e-06	0.697271	1	0.647	0.0913251
EFNA5	1.07e-05	0.347374	0.273	0.043	0.198053	MT-ND1	4.6e-16	0.487324	1	0.995	8.53e-12	TRRAP	0.000643268	0.351491	0.333	0.04	1	MINOS1	8e-05	0.515559	1	0.89	1	PEG10	5.17e-06	0.982475	1	0.788	0.0958233
PABPC1	1.11e-05	0.355189	1	1	0.205136	CXCL12	5.12e-16	0.345708	0.474	0.053	9.48e-12	IGFBP5	0.00067351	-1.69077	0.833	0.991	1	TIMM8B	8e-05	0.463564	1	0.662	1	RPL7A	5.26e-06	-0.299619	1	1	0.0974949
MAP2K2	1.14e-05	0.266991	0.545	0.174	0.211112	INSIG1	5.95e-16	0.458252	0.649	0.149	1.1e-11	TAZ	0.000703918	0.295565	0.5	0.09	1	BCHE	8.45e-05	0.416861	0.727	0.265	1	PNN	5.36e-06	0.596305	1	0.682	0.0993108
TSC22D1	1.16e-05	0.47974	0.909	0.569	0.215015	JOSD2	6.77e-16	0.38545	0.702	0.163	1.25e-11	DLK1	0.000737231	-1.44851	0.667	0.96	1	C14orf2	8.84e-05	0.425148	1	0.971	1	UQCR10	5.52e-06	0.562294	1	0.953	0.102191
NSA2	1.16e-05	0.440323	0.909	0.836	0.21503	TSC22D1	7.37e-16	0.686588	0.912	0.486	1.37e-11	SNRNP25	0.000765462	0.339532	0.833	0.26	1	ANXA1	8.91e-05	-0.857554	0.091	0.728	1	ACVR2A	5.89e-06	-0.686819	0.214	0.835	0.109089
GOLGA8B	1.18e-05	0.255327	0.5	0.151	0.21797	PXDN	1.47e-15	0.516968	0.772	0.264	2.72e-11	KCNMB2	0.000822021	0.296545	0.333	0.04	1	NDUFB1	9e-05	0.45112	0.909	0.743	1	TCEAL3	5.94e-06	0.535495	0.857	0.376	0.10998
ATP5E	1.21e-05	0.381549	1	0.99	0.223889	RPL27	1.57e-15	-0.25372	1	1	2.91e-11	SCMH1	0.000837298	0.25598	0.5	0.09	1	NPY	9.32e-05	0.275093	0.182	0.007	1	TCEAL4	6.18e-06	0.561287	1	0.835	0.114438
PSMA2	1.22e-05	0.417156	0.955	0.773	0.225985	RPS26	1.99e-15	0.347418	1	1	3.68e-11	AP1S2	0.000864276	0.620813	1	0.453	1	ITM2C	9.47e-05	0.661115	0.909	0.485	1	RPS3A	7.34e-06	-0.292636	1	1	0.135878
USMG5	1.31e-05	0.389158	0.909	0.923	0.243131	RPS5	2.05e-15	-0.250217	1	1	3.8e-11	TOP1	0.000890844	0.414522	0.833	0.274	1	RPS23	0.00010299	-0.278765	1	1	1	EIF5A	8.08e-06	0.626627	0.929	0.4	0.14959
COX7C	1.41e-05	0.272512	1	1	0.260713	FGF13	2.2e-15	0.547139	0.825	0.341	4.07e-11	COL21A1	0.000899315	0.445999	1	0.377	1	PSMB7	0.000112559	0.41801	1	0.934	1	PRL	8.76e-06	0.615453	0.857	0.306	0.162258
BLOC1S6	1.49e-05	0.326706	0.682	0.264	0.276389	PPDPF	2.56e-15	0.450363	1	0.995	4.73e-11	MAT2A	0.000909137	0.398355	0.667	0.161	1	RPS27A	0.000112761	-0.287062	1	1	1	FOXN3	9.1e-06	0.479345	0.929	0.341	0.168634
CAV1	1.51e-05	-0.560058	0	0.512	0.280219	PPIL3	3.29e-15	0.444859	0.737	0.231	6.09e-11	RPS12	0.000944794	-0.256488	1	1	1	MALAT1	0.000112761	-0.3805	1	1	1	SRGAP2B	9.14e-06	0.254626	0.714	0.141	0.169252
AKAP12	1.73e-05	0.48377	0.818	0.411	0.320458	GMPR	3.58e-15	0.266588	0.456	0.048	6.62e-11	SRGAP2C	0.000971837	0.370384	0.667	0.17	1	OXCT1	0.000114706	0.504304	0.727	0.228	1	IGF2	9.27e-06	-0.676577	1	0.988	0.171737
MORF4L2	1.84e-05	0.575537	1	0.93	0.34035	SRP14	4.34e-15	0.38054	1	1	8.05e-11	FOXN3	0.000995064	0.435679	1	0.377	1	RPS12	0.000123402	-0.304142	1	1	1	PUDP	9.36e-06	0.340302	0.643	0.129	0.173435
RNF187	1.94e-05	0.3342	0.727	0.298	0.359364	BGN	4.84e-15	-0.679602	0.544	0.923	8.97e-11	COX7A2	0.00100986	0.51526	1	0.973	1	RP11-706O15.1	0.000126462	0.288512	0.455	0.081	1	RPS3	9.71e-06	-0.310375	1	1	0.17992
YBX3	2e-05	0.506595	0.909	0.839	0.370176	STAC3	5.18e-15	0.525204	0.947	0.481	9.6e-11	RBSN	0.00104506	0.313177	0.5	0.108	1	NAA15	0.000143752	0.315962	0.909	0.353	1	ASAP1	9.98e-06	0.431123	0.786	0.271	0.184915
SPG20	2.01e-05	0.324673	0.909	0.468	0.372454	CYCS	8.43e-15	0.583019	0.947	0.63	1.56e-10	ARAF	0.00109301	0.301028	0.667	0.166	1	SPRY1	0.000143797	0.490488	0.727	0.257	1	TXNIP	1.01e-05	-0.845799	0.643	0.976	0.187799
COL13A1	2.11e-05	0.253954	0.318	0.067	0.391609	IDI1	8.71e-15	0.770343	0.86	0.457	1.61e-10	WBP1L	0.00111567	0.266253	0.5	0.094	1	DAB2	0.000151711	0.308887	0.636	0.184	1	RPS9	1.02e-05	-0.361145	1	1	0.188476
TCEAL1	2.15e-05	0.292452	0.864	0.395	0.399038	BCHE	1.06e-14	0.541897	0.737	0.226	1.96e-10	L2HGDH	0.00112009	0.272598	0.333	0.045	1	E2F3	0.000154266	0.250681	0.545	0.125	1	TSC22D1	1.03e-05	0.43478	0.857	0.294	0.190876
TBCA	2.45e-05	0.356289	1	0.97	0.454611	TCEB2	1.06e-14	0.472019	1	0.976	1.97e-10	C14orf2	0.00112608	0.521531	1	0.933	1	SMARCA1	0.000154291	0.41646	1	0.618	1	KLF12	1.05e-05	0.27029	0.429	0.047	0.194132
TULP4	2.5e-05	0.356819	0.591	0.214	0.463618	ITM2A	1.09e-14	-0.981808	0.702	0.933	2.01e-10	USP14	0.00114345	0.346446	0.833	0.274	1	VIM	0.000171082	-0.559965	1	1	1	RPL7	1.07e-05	-0.327084	1	1	0.197418
EIF1	2.51e-05	-0.329177	1	1	0.464401	RPL38	1.32e-14	0.258592	1	1	2.44e-10	FARP1	0.00115357	0.398426	0.833	0.269	1	TRMT61B	0.000179898	0.293119	0.545	0.14	1	UBE3B	1.1e-05	0.324187	0.643	0.141	0.203174
CIRBP	2.56e-05	0.319423	1	0.987	0.474286	YBX3	1.54e-14	0.483574	0.982	0.885	2.86e-10	RP11-260M2.1	0.00118563	0.360276	0.333	0.045	1	ZNF90	0.000199588	0.532102	1	0.713	1	RPL37	1.17e-05	0.267903	1	1	0.216521
ATP5L	2.79e-05	0.269848	1	0.997	0.515905	PRKX	2.18e-14	0.369002	0.667	0.159	4.03e-10	ATP2B1	0.00120501	0.520602	0.667	0.179	1	RPL17	0.000209932	0.384189	1	0.985	1	SREK1IP1	1.18e-05	0.423167	0.786	0.259	0.218649
ITM2C	2.89e-05	0.627634	0.818	0.615	0.536103	MARCKSL1	2.67e-14	0.497219	1	0.976	4.94e-10	MFN1	0.00120952	0.404238	0.5	0.103	1	RANBP17	0.000215014	0.277364	0.636	0.176	1	RBBP7	1.22e-05	0.597338	0.929	0.447	0.226074
FBLN1	2.95e-05	-0.649752	0.955	0.977	0.546426	RBBP7	4.64e-14	0.497833	0.912	0.529	8.6e-10	METTL6	0.0013458	0.358793	0.667	0.17	1	EPSTI1	0.000217424	0.275703	0.364	0.059	1	SPRY1	1.27e-05	0.436207	0.714	0.188	0.234781
NEB	3.03e-05	0.775013	0.682	0.428	0.561737	LITAF	4.9e-14	0.399813	0.596	0.139	9.07e-10	NUDT22	0.00136778	0.38828	0.667	0.179	1	SH3KBP1	0.000218266	0.312472	0.818	0.287	1	SYNE2	1.27e-05	0.459875	0.857	0.282	0.235656
GATM	3.24e-05	0.377003	0.409	0.12	0.599556	HIST1H4C	5.19e-14	0.948836	0.982	0.769	9.62e-10	DCN	0.00137277	-0.83288	0.833	0.991	1	HNRNPU	0.00022598	0.470213	1	0.868	1	NAA16	1.28e-05	0.264944	0.5	0.071	0.237864
S100A13	3.6e-05	-0.481148	0.682	0.9	0.667199	DNAJC15	5.27e-14	-0.518196	0	0.601	9.76e-10	DDX41	0.00138973	0.347608	0.667	0.17	1	GTF2F1	0.000255757	0.445512	0.818	0.434	1	CALM2	1.3e-05	0.573389	1	0.835	0.241684
CFDP1	3.67e-05	0.407286	0.909	0.732	0.679871	MAP2	5.4e-14	0.282868	0.439	0.053	1e-09	TBL1XR1	0.00139524	0.480104	1	0.372	1	RPIA	0.000270163	0.405127	0.818	0.375	1	RPL10A	1.34e-05	-0.354379	1	1	0.248554
MT-ND4	3.73e-05	0.441396	1	0.997	0.690583	2020-09-04	5.85e-14	0.314876	0.421	0.048	1.08e-09	SPRY1	0.00149173	0.296495	0.833	0.242	1	EEF1B2	0.000272116	-0.32025	1	1	1	CHCHD10	1.37e-05	-0.647491	0.214	0.835	0.254367
TCEB2	4.01e-05	0.35317	1	0.987	0.742305	PRL	7.21e-14	0.62736	0.772	0.284	1.34e-09	C12orf73	0.00150292	0.373689	0.667	0.179	1	EBPL	0.000283056	-0.519263	0.636	0.882	1	ACSL3	1.42e-05	0.553452	0.929	0.471	0.26325
S100A16	4.19e-05	-0.425775	0.364	0.742	0.775753	PEBP1	8.89e-14	0.450362	1	0.966	1.65e-09	PIGBOS1	0.00158204	0.387151	0.833	0.3	1	NES	0.000284854	0.528048	1	0.625	1	MT-CYB	1.54e-05	0.529426	1	0.965	0.28499
UBL5	4.43e-05	0.42119	1	0.926	0.820316	AKR1C2	1e-13	0.482022	0.789	0.288	1.86e-09	C6orf48	0.00159617	-0.585772	1	0.987	1	SNRPG	0.000296194	0.510298	1	0.949	1	RPS2	1.54e-05	-0.351018	1	1	0.285059
JPX	4.84e-05	0.439641	0.727	0.314	0.896277	EIF4G2	1.05e-13	0.521603	1	0.87	1.94e-09	ZDBF2	0.00162433	0.255439	0.667	0.157	1	CEP170	0.000299989	0.418085	1	0.662	1	RPS10	1.54e-05	-0.360547	1	1	0.285059
PDLIM3	4.88e-05	-0.530628	0.364	0.783	0.904096	OST4	1.29e-13	0.455969	1	0.986	2.38e-09	PCM1	0.00164914	0.575662	1	0.538	1	SNRPD1	0.000304945	0.367409	1	0.978	1	BCAP29	1.54e-05	0.371187	0.857	0.259	0.285539
ACAT2	4.94e-05	0.307796	0.364	0.09	0.915652	HSPB1	1.3e-13	0.450108	1	0.99	2.42e-09	NBL1	0.00165559	0.375011	0.5	0.103	1	EEF1D	0.000304965	-0.37004	1	1	1	ATP5J2	1.61e-05	0.624804	1	0.941	0.297965
TCEAL8	5.12e-05	0.547179	0.955	0.91	0.948413	SYAP1	1.4e-13	0.437141	0.789	0.284	2.6e-09	HSPB1	0.00166591	0.557964	1	0.996	1	DNAJC15	0.000306358	-0.449762	0	0.632	1	NARS	1.67e-05	0.408078	1	0.376	0.308624
EIF1AY	5.24e-05	-0.340371	0	0.468	0.970109	LDLR	1.46e-13	0.250749	0.439	0.053	2.7e-09	KCNE5	0.0017231	0.561509	0.5	0.117	1	FOS	0.000312896	-0.975398	0.182	0.713	1	SNRPB	1.76e-05	0.471814	1	0.718	0.325881
SMUG1	5.25e-05	0.261273	0.5	0.164	0.972077	BRD7	2.03e-13	0.360256	0.702	0.202	3.76e-09	RPL36A	0.00173843	0.36515	1	1	1	ISLR	0.000313809	0.279153	0.727	0.243	1	IDI1	1.81e-05	0.723763	0.929	0.459	0.334394
EIF5B	5.59e-05	0.377499	0.955	0.612	1	ZNF280D	2.09e-13	0.272066	0.526	0.101	3.87e-09	SPCS2	0.00174675	-0.709941	0.167	0.794	1	S100A10	0.000322749	-0.703182	0.909	1	1	CD276	1.81e-05	0.27642	0.571	0.106	0.336
BRI3	5.61e-05	0.400219	0.864	0.548	1	MXRA5	2.16e-13	0.282444	0.474	0.072	4e-09	APBB2	0.00184279	0.255553	0.5	0.099	1	USP10	0.000325294	0.352025	0.818	0.39	1	MYEOV2	1.83e-05	0.558457	1	0.882	0.3384
NBL1	5.94e-05	0.421549	0.591	0.207	1	SPRY1	2.26e-13	0.454816	0.754	0.269	4.18e-09	SNRPE	0.00185247	0.42097	1	0.973	1	AKR1C2	0.000337114	0.46806	0.818	0.294	1	HMGCS1	1.91e-05	0.259971	0.786	0.188	0.35309
NUPR1	6.02e-05	-0.637329	0.818	0.963	1	MT-CYB	2.96e-13	0.551254	1	0.99	5.47e-09	KAT6A	0.00186376	0.369561	0.5	0.112	1	ALDH9A1	0.000352627	0.353575	0.727	0.294	1	VIM	1.93e-05	-0.711302	1	1	0.35751
SSR4	6.87e-05	-0.304843	1	0.987	1	ACTB	2.96e-13	0.641463	1	1	5.47e-09	PSME1	0.00194441	0.562946	1	0.726	1	EGFL7	0.000353552	0.334763	0.636	0.199	1	ATP5E	2.02e-05	0.522937	1	1	0.373967
LGALS3	7.15e-05	-0.545973	0.091	0.525	1	RBMX	3.26e-13	0.467732	1	0.942	6.04e-09	HMGCS1	0.00200664	0.256101	0.5	0.103	1	INSIG1	0.000363535	0.347506	0.818	0.331	1	MLLT3	2.1e-05	-0.817768	0.714	0.941	0.388394
RHOC	8.24e-05	-0.416452	0.727	0.916	1	EEF1B2	3.32e-13	-0.336045	1	1	6.15e-09	DONSON	0.00200968	0.755173	1	0.789	1	NBEAL1	0.000371521	0.459333	1	0.978	1	RPS6	2.21e-05	-0.323791	1	1	0.409069
EMC10	8.33e-05	0.468645	0.727	0.401	1	ISLR	3.49e-13	0.355272	0.596	0.154	6.46e-09	TMEM258	0.00205757	0.445314	1	0.955	1	TULP4	0.000380925	0.322233	0.818	0.346	1	TSC22D3	2.37e-05	0.657065	0.929	0.494	0.43955
CRYAB	8.69e-05	-0.914764	0.318	0.719	1	GPM6B	4.84e-13	0.588927	0.947	0.678	8.96e-09	ZRANB3	0.00208253	0.326077	0.5	0.112	1	SYAP1	0.00038369	0.379259	0.818	0.412	1	HSPE1	2.4e-05	0.692989	1	0.894	0.444191
ARF5	8.73e-05	0.400721	0.818	0.502	1	RPLP0	5.19e-13	-0.260178	1	1	9.61e-09	ZNF280D	0.00221513	0.327402	0.333	0.049	1	DSCC1	0.000391605	0.317574	0.636	0.243	1	YTHDF2	2.51e-05	0.49955	1	0.518	0.464099
HERC2	8.86e-05	0.335317	0.636	0.311	1	TBCA	5.98e-13	0.459908	1	0.976	1.11e-08	JOSD2	0.00224882	0.344902	0.5	0.103	1	EIF3J	0.000392724	0.429802	1	0.574	1	ACTB	2.64e-05	0.905644	1	0.953	0.48862
SYAP1	0.000102009	0.357169	0.636	0.314	1	KIF1A	7.36e-13	0.540289	0.702	0.26	1.36e-08	TMA7	0.00233249	0.438774	1	0.964	1	DFFA	0.000392793	0.394306	0.727	0.309	1	CSTF2T	2.73e-05	0.250989	0.571	0.106	0.505559
EVL	0.000116689	0.274112	0.591	0.231	1	NSA2	8.05e-13	0.443292	1	0.846	1.49e-08	MAP2	0.00233307	0.330101	0.333	0.049	1	TMEM259	0.000428052	0.277892	0.727	0.265	1	RPL8	2.76e-05	-0.287318	1	1	0.51106
ALDH9A1	0.000125741	0.351232	0.682	0.341	1	BCAT1	9.05e-13	0.415856	0.842	0.389	1.68e-08	QSOX1	0.0023349	0.369587	0.5	0.108	1	CFDP1	0.000433893	0.403755	1	0.868	1	FNDC5	2.92e-05	0.417741	0.714	0.2	0.540934
MDFI	0.000127853	0.429511	1	0.819	1	RPL36A	9.58e-13	0.329518	1	1	1.77e-08	SPPL2A	0.00238982	0.318951	0.5	0.117	1	ACVR2B	0.000436969	0.481478	0.818	0.426	1	DLK1	3.13e-05	-1.11519	0	0.671	0.579914
FAM114A1	0.000142038	-0.435388	0.364	0.739	1	ROMO1	1.02e-12	0.491664	0.93	0.668	1.89e-08	SLC16A9	0.00242292	0.290048	0.5	0.108	1	SPIN1	0.000437825	0.346984	0.909	0.397	1	UQCR11	3.28e-05	0.568533	1	0.929	0.608421
XPO1	0.000145395	0.27727	0.773	0.331	1	COL9A3	1.05e-12	0.313727	0.456	0.077	1.95e-08	TAF1B	0.00250006	0.276501	0.5	0.112	1	EIF1AY	0.000457012	-0.419959	0	0.61	1	RPL38	3.29e-05	0.259927	1	1	0.609618
HNRNPA1	0.000151799	0.287766	1	1	1	PABPC1	1.13e-12	0.340239	1	0.995	2.1e-08	OFD1	0.00257191	0.403186	0.667	0.197	1	TOPORS	0.000475925	0.381809	0.818	0.346	1	RPL32	3.29e-05	-0.268836	1	1	0.609618
WDR45B	0.000157773	0.42406	0.864	0.612	1	BASP1	1.37e-12	0.56381	0.947	0.635	2.55e-08	AKAP12	0.00266732	0.826065	0.833	0.43	1	ARF5	0.000506412	0.4304	0.909	0.566	1	RPS19	3.29e-05	-0.302481	1	1	0.609618
FXYD1	0.00015816	0.306715	0.773	0.348	1	POLR2L	1.7e-12	0.524089	0.93	0.74	3.14e-08	DNAJC21	0.00273916	0.375843	0.833	0.283	1	CHML	0.000509478	0.367653	0.545	0.14	1	GMPR	3.3e-05	0.37736	0.5	0.082	0.611141
NDUFB1	0.000159753	0.417604	0.864	0.676	1	LIMCH1	2.15e-12	0.251112	0.404	0.053	3.98e-08	ATP5I	0.00278808	0.490729	1	0.883	1	ATP5J2	0.000517156	0.405414	1	0.926	1	MLLT10	3.34e-05	0.25671	0.571	0.106	0.61827
TOMM7	0.000176817	0.315026	1	0.993	1	ACTA2	2.56e-12	0.938023	0.947	0.611	4.74e-08	PPP1R14B	0.00278831	0.513776	1	0.484	1	CDKN2AIP	0.000530044	0.275352	0.455	0.11	1	EZR	3.4e-05	0.359082	0.714	0.188	0.629199
CD151	0.000178078	-0.436538	0.636	0.813	1	MT-ND4	2.63e-12	0.420566	1	1	4.88e-08	SON	0.00283592	0.499792	1	0.628	1	UBE2M	0.000530736	0.271828	0.545	0.169	1	CLPTM1	3.45e-05	0.341404	0.786	0.259	0.638385
COL3A1	0.000188048	-0.513885	0.955	0.997	1	FTH1	2.63e-12	0.309324	1	1	4.88e-08	GTF2H5	0.00287813	0.51826	1	0.673	1	STAC3	0.000544262	0.552225	0.636	0.228	1	NDUFB2	3.48e-05	0.53248	1	0.765	0.6454
SMARCA1	0.000195545	0.43741	0.773	0.582	1	HSPE1	2.66e-12	0.547149	1	0.885	4.92e-08	C2orf68	0.00307721	0.351702	0.667	0.193	1	PITPNB	0.000546415	0.53383	0.818	0.397	1	STAG2	3.49e-05	0.522501	0.929	0.459	0.646305
RHOB	0.00019649	-0.485548	0.182	0.595	1	TNNT1	3.15e-12	0.57131	1	0.962	5.84e-08	PTPRD	0.00323438	0.453811	0.667	0.197	1	USMG5	0.000547213	0.490872	1	0.963	1	EMC10	3.63e-05	0.673789	1	0.541	0.672374
BLVRB	0.00019882	-0.387916	0.409	0.756	1	ZFAS1	3.52e-12	-0.339891	1	1	6.53e-08	SNHG8	0.0033029	-0.626876	1	0.991	1	LUM	0.000548471	-1.05098	0.364	0.816	1	NMRK1	3.78e-05	0.340032	0.5	0.094	0.699341
TMED9	0.000200847	-0.39223	0.955	0.97	1	TMEM258	3.93e-12	0.426223	1	0.947	7.28e-08	RPS26	0.0033029	0.342607	1	1	1	ARPP21	0.000553923	0.282285	0.545	0.14	1	RPLP0	3.92e-05	-0.314687	1	1	0.726062
ELP6	0.00020476	0.371314	0.591	0.247	1	C1orf122	4.61e-12	0.466485	0.965	0.889	8.55e-08	ATG4A	0.00344506	0.255198	0.333	0.054	1	NUTM2B-AS1	0.000558332	0.331047	0.818	0.36	1	MSMO1	3.93e-05	0.816302	0.786	0.353	0.727074
LINC00667	0.000209719	0.296526	0.591	0.241	1	LUM	4.67e-12	-0.974981	0.298	0.712	8.66e-08	SOX4	0.00357754	0.642275	1	0.789	1	NACA2	0.000607438	0.3977	0.818	0.426	1	ATP2B1	4.11e-05	0.52735	1	0.576	0.760494
POLR2J3	0.000217125	0.297983	0.727	0.378	1	TMEM176B	4.88e-12	0.25902	0.456	0.077	9.05e-08	SECISBP2L	0.00358808	0.389087	0.667	0.247	1	MME	0.000618562	-0.578746	0.091	0.647	1	BCHE	4.24e-05	0.369683	0.643	0.176	0.785992
SNCA	0.000237507	0.251929	0.409	0.137	1	NBEAL1	4.99e-12	0.438838	0.982	0.942	9.25e-08	MZT1	0.00360248	0.305113	0.667	0.211	1	DDX5	0.000622894	0.48979	1	0.89	1	UBL5	4.27e-05	0.6066	1	0.976	0.791876
RPL7L1	0.000262112	0.486109	0.864	0.572	1	RHOJ	5.18e-12	0.29388	0.561	0.13	9.6e-08	SLC38A6	0.00370567	0.280018	0.5	0.121	1	DONSON	0.000626637	0.601315	1	0.949	1	KLHDC8B	4.34e-05	0.277375	0.5	0.094	0.803835
MRPS16	0.00027738	-0.383033	0.364	0.676	1	STK26	7.15e-12	0.332756	0.614	0.168	1.32e-07	NPM1	0.00372477	0.346737	1	1	1	PRPF3	0.000627666	0.280678	0.636	0.213	1	TMEM258	4.46e-05	0.475144	1	0.929	0.825365
MMAB	0.000282446	0.358789	0.636	0.331	1	PPP1R14B	1.14e-11	0.591721	0.965	0.721	2.11e-07	CDC42SE2	0.00375235	0.382581	0.5	0.126	1	CLSPN	0.000630823	0.341756	1	0.485	1	BRD7	4.63e-05	0.267477	0.929	0.247	0.857379
TPM1	0.000303169	0.381887	1	0.809	1	SRGAP1	1.16e-11	0.349174	0.667	0.212	2.15e-07	UBR1	0.00379305	0.306325	0.333	0.054	1	AIFM1	0.000631207	0.374962	0.455	0.118	1	NPC2	4.84e-05	0.537881	1	0.906	0.897354
NDUFA3	0.000310016	0.399755	0.864	0.595	1	H3F3A	1.19e-11	0.292797	1	0.995	2.2e-07	KATNAL2	0.00379305	0.292218	0.333	0.054	1	JUN	0.000631783	-0.813945	0.182	0.699	1	2020-09-11	4.96e-05	0.468799	1	0.729	0.919565
SON	0.000320752	0.397885	0.864	0.722	1	HMGN3	1.23e-11	0.453881	0.982	0.812	2.28e-07	UBE2G2	0.00389183	0.250591	0.667	0.188	1	BPHL	0.000637388	0.366577	0.727	0.287	1	VPS37B	5.04e-05	0.253062	0.571	0.118	0.933385
LIMD1	0.000329632	0.311639	0.227	0.047	1	SPATC1L	1.35e-11	0.314299	0.719	0.236	2.5e-07	NPEPPS	0.00393064	0.399282	0.833	0.368	1	ATF4	0.000659025	-0.515932	0.727	0.926	1	MAGED2	5.05e-05	0.530035	1	0.894	0.934975
IGFBP5	0.000346946	-0.511723	0.955	0.99	1	STMN1	1.41e-11	0.630012	0.982	0.909	2.62e-07	MT-ND4L	0.00401441	0.913041	1	0.821	1	TCEA3	0.000708755	0.294108	0.636	0.206	1	EIF1AY	5.29e-05	-0.649618	0	0.647	0.979328
CGGBP1	0.000349946	0.379467	0.727	0.381	1	MSMO1	1.61e-11	0.50936	0.754	0.303	2.98e-07	PFDN5	0.00403262	-0.320377	1	0.996	1	EIF4G1	0.000748421	0.305207	0.909	0.39	1	YWHAB	5.48e-05	0.458987	1	0.706	1
SERPINH1	0.000368055	-0.447651	1	0.99	1	STAG2	1.69e-11	0.436946	0.912	0.5	3.14e-07	RP11-12G12.7	0.00411835	0.332792	0.667	0.188	1	RCN2	0.000776272	0.368428	1	0.934	1	MYCBP	5.53e-05	0.259796	0.643	0.141	1
NPW	0.000380755	-0.52808	0.045	0.435	1	SNRPG	1.73e-11	0.438367	0.947	0.707	3.2e-07	MT-ND1	0.00419505	0.620842	1	0.996	1	CHD1	0.000786122	0.283499	0.909	0.463	1	CCNK	5.57e-05	0.284712	0.643	0.165	1
YES1	0.000383728	0.341379	0.773	0.415	1	SRSF3	1.96e-11	0.508884	1	0.832	3.62e-07	DNAH14	0.00424194	0.261554	0.5	0.121	1	2020-09-02	0.000792123	-0.453602	0.818	0.897	1	TMA7	5.78e-05	0.41774	1	0.988	1
MME	0.00040393	-0.43801	0.136	0.498	1	CFDP1	2.11e-11	0.469843	0.947	0.726	3.9e-07	RABGGTB	0.00424809	0.360123	0.833	0.354	1	OST4	0.00079832	0.394824	1	1	1	DDA1	5.8e-05	0.37843	1	0.365	1
ATP2B1	0.000404379	0.297451	0.5	0.211	1	SNRPF	2.16e-11	0.440512	1	0.904	3.99e-07	PXDN	0.00427151	0.352656	0.667	0.224	1	ANXA2	0.000819811	-0.679729	1	0.985	1	EIF2S1	5.87e-05	0.39016	0.929	0.4	1
ZYX	0.000410335	0.332357	0.545	0.241	1	IGFBP4	2.19e-11	0.518316	0.877	0.505	4.06e-07	RPRD1A	0.00427974	0.343591	0.667	0.197	1	IMPA2	0.000831217	0.266822	0.818	0.353	1	DNAL4	5.9e-05	0.372596	0.643	0.165	1
ADGRL3	0.000411452	0.28598	0.227	0.047	1	CAV1	2.43e-11	-0.534893	0.018	0.538	4.49e-07	NRN1	0.00439701	0.307247	0.167	0.013	1	PNN	0.000836518	0.473522	0.909	0.897	1	PRUNE2	5.94e-05	0.305112	0.714	0.188	1
MYLIP	0.000450903	0.252029	0.5	0.187	1	JPX	2.51e-11	0.36775	0.754	0.346	4.66e-07	RBMS1	0.00444727	0.29452	0.833	0.314	1	UBE3A	0.000850074	0.350077	0.909	0.581	1	RPSA	6.03e-05	-0.342019	1	1	1
SHFM1	0.000451817	0.284094	0.909	0.933	1	MME	2.64e-11	-0.589161	0.018	0.529	4.88e-07	MGA	0.00447786	0.391855	0.5	0.135	1	COX7B	0.000863895	0.489779	1	0.949	1	MRPL49	6.16e-05	0.368433	0.714	0.235	1
SKIV2L2	0.000491722	0.269248	0.5	0.194	1	NDUFA1	2.7e-11	0.43776	0.982	0.774	5.01e-07	NGFRAP1	0.00453781	0.658973	1	0.987	1	SOX4	0.000866153	0.461226	1	0.779	1	IGFBP2	6.25e-05	0.506382	0.857	0.318	1
MT-CYB	0.000499361	0.575302	1	0.97	1	RPS21	3.56e-11	0.262871	1	1	6.59e-07	KXD1	0.00466579	0.485351	1	0.502	1	PLS3	0.000901129	0.353551	1	0.64	1	COX7A2	6.29e-05	0.488456	1	1	1
MZT2B	0.000501634	-0.325281	0.955	0.983	1	SQLE	3.88e-11	0.502512	0.719	0.341	7.18e-07	CKB	0.00467114	0.334972	0.833	0.318	1	APEX1	0.000906657	0.348387	1	0.897	1	RPL4	6.29e-05	-0.288723	1	1	1
METAP2	0.000516173	0.373943	0.909	0.829	1	CHCHD10	4.05e-11	-0.532237	0.158	0.649	7.5e-07	METAP2	0.00471051	0.468724	1	0.785	1	PPAT	0.000922667	0.254283	0.727	0.265	1	PSAT1	6.44e-05	0.385362	0.571	0.129	1
EDIL3	0.000520089	-0.401235	0.045	0.421	1	ITGB1	4.07e-11	0.464554	0.93	0.721	7.54e-07	NBEAL1	0.00475462	0.620414	1	0.919	1	HNRNPA1L2	0.00092725	0.397523	0.909	0.419	1	PPP1R14B	6.49e-05	0.657531	1	0.871	1
FASTKD2	0.000524478	0.256503	0.409	0.137	1	ENPP6	4.37e-11	0.270312	0.421	0.077	8.09e-07	MED21	0.00477097	0.274971	0.833	0.314	1	RAB13	0.00093436	-0.50851	0.818	0.949	1	RPL17	6.56e-05	0.33797	1	0.976	1
MXRA5	0.000528115	0.255763	0.364	0.11	1	NACA2	4.65e-11	0.427542	0.825	0.457	8.61e-07	RBM39	0.00479269	0.538638	1	0.901	1	MAPRE1	0.000943638	0.379877	0.909	0.551	1	CYCS	6.61e-05	0.59832	1	0.812	1
TMEM261	0.000548709	0.372066	0.909	0.652	1	RP11-12G12.7	4.77e-11	0.262797	0.614	0.168	8.83e-07	MFAP1	0.00483438	0.360472	0.833	0.3	1	NFIB	0.000948386	0.518534	1	0.86	1	BMPR2	7.14e-05	0.308668	0.786	0.212	1
MT-ND2	0.000560339	0.453495	1	0.99	1	2020-09-11	4.92e-11	0.489824	1	0.779	9.11e-07	IGFBP4	0.00486915	0.476335	0.833	0.417	1	VEZF1	0.000963424	0.296744	0.636	0.25	1	SEC11A	7.45e-05	-0.412683	1	0.976	1
NNAT	0.00056638	0.40525	0.955	0.572	1	MYL6	5.14e-11	0.423581	1	1	9.52e-07	KLHL13	0.00487151	0.261755	0.667	0.188	1	RBM8A	0.000977155	0.339262	1	0.875	1	AKR1C1	7.56e-05	0.407835	0.5	0.118	1
FOXN3	0.000586835	0.371762	0.636	0.324	1	COL1A2	5.49e-11	0.384273	1	0.99	1.02e-06	GULP1	0.00500002	0.393962	0.667	0.224	1	ING2	0.000979902	0.316458	0.909	0.522	1	SUB1	7.77e-05	0.411833	1	0.976	1
SNX3	0.000598533	-0.338373	0.955	0.983	1	ID1	7.06e-11	0.683825	0.895	0.558	1.31e-06	ANKRD36B	0.00519185	0.365913	0.667	0.206	1	MRS2	0.000990953	0.281427	0.545	0.162	1	ITM2C	7.9e-05	0.659837	0.929	0.435	1
CDKN1C	0.000606249	0.304521	0.818	0.545	1	MYC	7.6e-11	-0.454093	0.123	0.611	1.41e-06	TROVE2	0.00520048	0.278713	1	0.498	1	SLBP	0.000998197	0.539857	0.909	0.684	1	GALNT11	7.98e-05	0.257536	0.786	0.224	1
DYNC1I2	0.000611591	0.329551	0.909	0.699	1	UQCR11	7.74e-11	0.409891	1	0.909	1.43e-06	NEB	0.00529722	0.837346	1	0.731	1	KPNA3	0.00101023	0.362152	0.727	0.346	1	RPL18	8.1e-05	-0.258179	1	1	1
TMA7	0.000617196	0.40137	1	0.983	1	LDHB	8.65e-11	0.308287	1	0.995	1.6e-06	LUM	0.00538964	-1.11715	0	0.65	1	SNHG8	0.00101217	-0.563376	1	0.985	1	TAGLN3	8.31e-05	0.287438	0.643	0.165	1
P4HA2	0.000631215	-0.430692	0.636	0.816	1	TIMP3	8.75e-11	0.262412	0.596	0.159	1.62e-06	NSA2	0.00553746	0.438636	1	0.848	1	UBE2N	0.00102512	0.444212	1	0.706	1	COX6C	8.44e-05	0.404184	1	0.988	1
HMGN1	0.000633626	0.266699	1	0.997	1	ATP6V1G1	9.14e-11	0.384807	0.982	0.909	1.69e-06	ANKS3	0.00554351	0.370372	0.667	0.251	1	GPM6B	0.00104657	0.438632	0.909	0.699	1	PALMD	8.62e-05	0.515362	0.929	0.588	1
XIAP	0.000655515	0.400511	0.545	0.258	1	COX6B1	1.08e-10	0.302805	1	0.995	2e-06	KIAA0355	0.00556699	0.253421	0.5	0.126	1	TIMP1	0.00106617	-0.627836	0.818	0.978	1	NDUFB1	8.83e-05	0.433667	0.929	0.671	1
COL6A3	0.000661285	-0.396116	0.864	0.953	1	NDUFB2	1.11e-10	0.513326	0.947	0.779	2.06e-06	C8orf88	0.0055825	0.283206	0.5	0.139	1	BTF3	0.0010664	-0.257184	1	1	1	TCEA3	8.97e-05	0.52489	0.786	0.4	1
TIMP1	0.000661773	-0.519822	0.909	0.973	1	ACVR2B	1.14e-10	0.363724	0.825	0.394	2.12e-06	EIF5A	0.00574428	0.483002	0.833	0.368	1	VASH2	0.00108524	0.328392	0.455	0.11	1	CSDE1	9.1e-05	0.477588	1	0.882	1
GAPDH	0.000673529	-0.370148	1	1	1	G3BP1	1.16e-10	0.387278	0.807	0.413	2.15e-06	GAPDH	0.00583427	-0.445252	1	1	1	IFI6	0.00110276	-0.70482	0	0.559	1	RPS27L	9.14e-05	0.567958	1	0.906	1
SLIRP	0.000725227	0.351693	0.818	0.639	1	SNCA	1.3e-10	0.289935	0.596	0.173	2.41e-06	ZC3H13	0.0059267	0.617587	0.833	0.561	1	NFIA	0.00112021	0.406944	1	0.603	1	TRIP12	9.33e-05	0.26922	0.929	0.318	1
RYK	0.000750373	0.25403	0.455	0.164	1	PPA1	1.41e-10	-0.471929	0.649	0.899	2.61e-06	LINC00969	0.00592895	0.405231	0.667	0.206	1	SRSF10	0.00112778	0.337227	1	0.831	1	PPIL3	9.76e-05	0.281385	0.857	0.271	1
ZCCHC11	0.000755325	0.332493	0.818	0.482	1	YTHDF2	1.41e-10	0.392483	0.912	0.548	2.62e-06	BYSL	0.00593683	0.276604	0.5	0.126	1	ALDH16A1	0.00115098	0.251393	0.545	0.14	1	SMARCC2	0.000102759	0.312588	0.786	0.235	1
VCP	0.000777972	0.310858	0.773	0.475	1	HMGN1	1.43e-10	0.401736	1	0.99	2.65e-06	SEC11A	0.00594596	-0.555906	1	0.969	1	MAP2	0.00116032	0.363656	0.455	0.118	1	BCL7A	0.000105436	0.31961	0.929	0.365	1
PLAGL1	0.000818489	0.462586	0.682	0.421	1	NEAT1	1.51e-10	-0.545814	0.281	0.731	2.8e-06	HARS	0.00594787	0.420523	0.667	0.269	1	C17orf89	0.00118475	0.39945	1	0.676	1	TPPP3	0.000106832	0.756026	0.929	0.412	1
FTL	0.000843084	-0.353341	1	1	1	METAP2	1.6e-10	0.491266	0.982	0.822	2.96e-06	MICU1	0.00600429	0.258153	0.667	0.193	1	SLIRP	0.00119775	0.469318	0.909	0.735	1	HNRNPK	0.000108264	0.449605	1	0.953	1
TBL1XR1	0.000848779	0.297539	0.773	0.428	1	CPM	1.67e-10	-0.613236	0.211	0.692	3.08e-06	UQCR11	0.00610065	0.546829	1	0.852	1	RPS10	0.0012456	-0.251559	1	1	1	MSRB3	0.000112695	0.319681	0.714	0.212	1
SLC38A1	0.000884803	0.264559	0.636	0.288	1	ALDH9A1	1.85e-10	0.375824	0.719	0.279	3.42e-06	ZNF90	0.00610791	0.511485	1	0.717	1	AKAP12	0.00130572	0.489553	0.909	0.654	1	RANBP2	0.000113594	0.272909	0.786	0.235	1
COL21A1	0.000908823	0.315285	0.591	0.278	1	RNF187	1.96e-10	0.424342	0.632	0.245	3.62e-06	NFIB	0.00625504	0.560604	1	0.619	1	GTF2H1	0.00131979	0.294974	0.727	0.272	1	DNAJC8	0.000117674	0.561672	0.929	0.706	1
DDX3Y	0.000910441	-0.26887	0	0.355	1	PLAGL1	2.09e-10	0.422342	0.789	0.452	3.88e-06	SURF6	0.00634019	0.310542	0.5	0.13	1	GTPBP4	0.0013548	0.324324	0.818	0.375	1	HERC2	0.000121225	0.346548	0.786	0.282	1
EIF1AX	0.000917916	0.34775	0.864	0.629	1	GOLGA8B	2.45e-10	0.362617	0.579	0.192	4.54e-06	TMED2	0.00650472	-0.652445	0.333	0.794	1	CNOT7	0.00137585	0.304961	0.909	0.647	1	HNRNPA1L2	0.000121927	0.419372	0.786	0.353	1
GLT8D2	0.000962429	0.325086	0.727	0.465	1	SLIRP	2.82e-10	0.414655	0.947	0.678	5.23e-06	LGI2	0.00661749	0.526112	0.5	0.148	1	GAPDH	0.00138013	-0.3216	1	1	1	PRR32	0.000125504	0.486291	0.429	0.071	1
UQCR11	0.000970716	0.294273	1	0.906	1	SYCE1L	2.92e-10	0.291725	0.509	0.135	5.42e-06	RPS10	0.00678949	-0.257225	1	1	1	CAV1	0.00140017	-0.471589	0	0.544	1	GAR1	0.00012786	0.33934	0.786	0.259	1
TTC37	0.000998311	0.315778	0.727	0.388	1	EBPL	2.95e-10	-0.452467	0.667	0.928	5.46e-06	WDR60	0.00688912	0.328836	0.833	0.318	1	TBC1D16	0.00142638	0.306854	0.545	0.169	1	ADIPOR1	0.000139812	0.352849	1	0.506	1
MT-CO2	0.000999582	0.345487	1	1	1	NDUFB1	3.03e-10	0.443632	0.965	0.649	5.61e-06	PKIB	0.00690087	0.36818	0.667	0.26	1	PITX2	0.0014498	-0.515683	0.818	0.941	1	SS18	0.000141654	0.346079	0.5	0.118	1
QPRT	0.00102618	0.312913	1	0.883	1	CFL1	3.18e-10	0.372989	1	0.995	5.88e-06	MYEOV2	0.00711962	0.38825	1	0.682	1	CSRP2	0.0014888	-0.616101	0.818	0.963	1	JPX	0.000143013	0.366429	0.857	0.341	1
HNRNPA0	0.00104656	0.310385	0.955	0.903	1	ACVR2A	3.21e-10	-0.435758	0.386	0.774	5.95e-06	ACTB	0.00718126	0.517386	1	0.964	1	DCN	0.00148965	-0.625027	0.818	1	1	GABPB1-AS1	0.000143615	0.65423	1	0.906	1
PUS7L	0.00105908	-0.294023	0.091	0.465	1	HES6	3.32e-10	0.46049	0.825	0.428	6.15e-06	NONO	0.0072305	0.427247	1	0.852	1	HNRNPF	0.00150271	0.445684	1	0.787	1	EI24	0.000143863	0.550864	1	0.706	1
NFIB	0.00107105	0.378461	0.909	0.722	1	RALGPS2	3.47e-10	0.351922	0.789	0.365	6.43e-06	MRPL52	0.00729339	0.526695	1	0.561	1	PAK2	0.0015265	0.34438	1	0.713	1	NDUFV3	0.000143863	0.296937	1	0.706	1
FKBP11	0.00108466	-0.364071	0.182	0.502	1	PGF	4.03e-10	0.333036	0.579	0.168	7.46e-06	HES6	0.0073059	0.34004	0.667	0.206	1	MZT2A	0.0015279	-0.429478	1	0.985	1	NAB1	0.000143879	0.314306	0.571	0.141	1
VDAC3	0.00109018	0.352294	0.773	0.589	1	SON	4.37e-10	0.407672	0.947	0.721	8.09e-06	ANP32A	0.00733201	0.370983	1	0.498	1	MEGF10	0.00156993	0.25575	0.636	0.228	1	YAF2	0.000144401	0.360646	0.857	0.376	1
BASP1	0.00112793	0.342303	0.909	0.709	1	SLC38A1	4.85e-10	0.361006	0.807	0.385	8.98e-06	N6AMT2	0.00733682	0.351495	0.667	0.224	1	SRP19	0.00157351	0.42663	0.818	0.5	1	DRAXIN	0.000144654	0.262917	0.286	0.024	1
LINC00152	0.00112856	-0.339515	0.045	0.391	1	HNRNPA0	5.43e-10	0.346042	1	0.981	1.01e-05	ZNF771	0.00735161	0.260941	0.5	0.139	1	TSPYL1	0.00159143	0.321548	0.545	0.169	1	RNF2	0.000147307	0.252156	0.714	0.2	1
SOX4	0.0011477	0.418463	0.909	0.839	1	HNRNPA1L2	5.56e-10	0.366089	0.807	0.399	1.03e-05	CTDSPL2	0.0074812	0.272983	0.667	0.22	1	NAP1L4	0.00159185	0.364974	1	0.596	1	EIF4G2	0.000150075	0.384659	1	0.953	1
TUBA1C	0.00126452	-0.346255	0.182	0.545	1	CALM2	5.62e-10	0.433316	1	0.928	1.04e-05	MT-ND3	0.00769842	0.916929	0.833	0.892	1	MRPL22	0.00162452	0.299026	0.909	0.559	1	EEF1E1	0.00015489	0.320892	0.857	0.329	1
C11orf58	0.00136524	0.292605	0.955	0.93	1	ARF5	6.84e-10	0.365292	0.877	0.5	1.27e-05	SVIL	0.00815402	0.839301	0.5	0.157	1	RASL11B	0.00167624	0.253999	0.636	0.228	1	POLR2L	0.000155718	0.539783	1	0.906	1
TFAM	0.00139779	0.250734	0.409	0.164	1	TCEA3	7.31e-10	0.383766	0.719	0.298	1.35e-05	PSMA4	0.00816797	-0.563798	0.333	0.798	1	NCL	0.00169016	0.462283	1	0.985	1	COL21A1	0.000155797	0.403917	1	0.412	1
PCOLCE	0.00142397	-0.483964	0.727	0.876	1	FITM1	7.49e-10	0.29984	0.526	0.149	1.39e-05	IL10RB	0.00818843	0.295401	0.667	0.247	1	LGALS1	0.00169017	-0.585181	1	1	1	MORF4L2	0.000162731	0.569071	1	0.965	1
NAP1L4	0.00142537	0.252332	0.727	0.408	1	RPL17	7.78e-10	0.318044	1	0.995	1.44e-05	RP11-693J15.5	0.00821779	0.351881	0.5	0.143	1	KDELC2	0.00169254	0.255067	0.727	0.272	1	COX7C	0.000162761	0.296225	1	1	1
SNRPD1	0.00145358	0.344599	0.909	0.88	1	UBE2E2	7.85e-10	0.386748	0.772	0.394	1.45e-05	BICC1	0.00828819	0.334748	0.5	0.139	1	NSRP1	0.00169787	0.376788	0.818	0.449	1	ESF1	0.000165203	0.390987	0.857	0.471	1
CHD9	0.00151053	0.314656	0.955	0.769	1	C11orf58	8.26e-10	0.387015	1	0.952	1.53e-05	MIF	0.00841315	0.887947	1	0.865	1	FILIP1	0.00177325	0.261506	0.455	0.125	1	ANAPC16	0.000169141	0.443824	0.929	0.776	1
KRT17	0.00153062	-0.695129	0.136	0.525	1	ATP5L	9.35e-10	0.258751	1	0.995	1.73e-05	AKR1C1	0.0086461	0.324164	0.833	0.381	1	CEP78	0.0017998	0.300507	0.818	0.375	1	UQCRHL	0.000169658	0.329261	0.714	0.212	1
NEAT1	0.00154042	-0.449671	0.5	0.849	1	MALAT1	9.94e-10	-0.366419	1	1	1.84e-05	BTG1	0.00880389	-0.589701	1	0.987	1	NASP	0.00180142	0.588613	1	0.86	1	FADS1	0.000180171	0.424443	0.857	0.353	1
IGF2	0.00160513	-0.365268	0.955	0.993	1	EIF1AY	9.98e-10	-0.385533	0	0.452	1.85e-05	TCEAL4	0.00912111	0.486057	1	0.749	1	SRSF3	0.00182147	0.452281	1	0.956	1	HSPH1	0.000180761	0.297611	0.929	0.447	1
ADI1	0.00162894	0.321147	0.636	0.378	1	LINC00936	1.05e-09	0.276026	0.421	0.087	1.94e-05	MXI1	0.00919857	0.282219	0.667	0.229	1	ASAP1	0.00189159	0.270728	0.818	0.426	1	MZT1	0.000187264	0.37804	0.786	0.329	1
RASSF8-AS1	0.00171177	0.273105	0.409	0.151	1	NPC2	1.15e-09	0.38824	0.982	0.938	2.14e-05	RCN2	0.009333	0.627995	0.833	0.794	1	CWC22	0.00189506	0.26133	0.818	0.346	1	NHSL2	0.000195158	0.255707	0.786	0.235	1
MARCKSL1	0.00171979	0.333871	0.955	0.97	1	CAPZB	1.16e-09	0.361845	0.982	0.774	2.15e-05	TIMP2	0.00942474	0.406741	0.667	0.229	1	NETO2	0.00191391	0.305085	0.455	0.118	1	NACA2	0.000199795	0.298828	0.929	0.376	1
KIAA0586	0.00172686	0.323918	0.364	0.13	1	EGFL7	1.19e-09	0.358629	0.579	0.192	2.2e-05	TSTD1	0.00945338	0.394842	0.667	0.242	1	RP11-798M19.6	0.00194311	-0.458112	0.091	0.581	1	INSIG1	0.000205337	0.536953	0.643	0.212	1
ANXA2	0.0017624	-0.413515	0.955	0.997	1	SKP1	1.19e-09	0.359592	1	0.986	2.21e-05	RALGPS2	0.00945338	0.378225	0.667	0.242	1	ERLIN1	0.00197217	0.260131	0.727	0.279	1	APOBEC2	0.000206067	0.554269	0.929	0.565	1
PLAC9	0.00176245	-0.503552	0.5	0.763	1	NREP	1.23e-09	0.443857	0.877	0.606	2.28e-05	TMBIM4	0.00950203	0.289285	0.833	0.359	1	PRKAR2A	0.00197295	0.355519	0.818	0.39	1	DERL1	0.000207035	0.25181	0.714	0.235	1
CYB5A	0.00177881	0.321332	0.773	0.485	1	CSRP2	1.27e-09	-0.6116	0.842	0.952	2.36e-05	CAPNS1	0.00958802	0.332658	0.833	0.318	1	NOM1	0.00197299	0.307561	0.636	0.235	1	AKIRIN1	0.000208837	0.350613	0.929	0.482	1
ST5	0.00178849	0.273216	0.5	0.227	1	SEC61G	1.48e-09	0.401616	1	0.947	2.75e-05	MRPL4	0.00958912	0.313506	0.833	0.381	1	TCEAL4	0.00199779	0.539707	1	0.801	1	DHX36	0.000214791	0.329118	0.929	0.424	1
STARD4-AS1	0.00180917	0.40185	0.5	0.231	1	NARS	1.72e-09	0.345927	0.877	0.49	3.19e-05	STRBP	0.00960431	0.254669	0.333	0.067	1	CALD1	0.00201274	-0.685616	1	1	1	HMGN1	0.00021512	0.440652	1	0.953	1
KDELR3	0.00184739	-0.367173	0.318	0.629	1	RAC3	1.95e-09	-0.4693	0.281	0.668	3.6e-05	COPE	0.0096893	-0.560552	0.667	0.852	1	ITGB1BP1	0.00201403	0.316922	0.909	0.669	1	ATP6V0D1	0.000215889	0.327244	0.786	0.306	1
ACVR2B	0.00188725	0.318496	0.591	0.298	1	MDM1	2e-09	-0.412729	0.123	0.606	3.7e-05	RRAS2	0.0100771	0.268014	0.5	0.143	1	CUL1	0.00202306	0.268685	0.636	0.25	1	C7orf55	0.000222632	0.355577	0.857	0.388	1
RAC3	0.00190487	-0.349452	0.409	0.696	1	DCN	2.01e-09	-0.471819	1	1	3.72e-05	SH3KBP1	0.0101866	0.339884	0.5	0.139	1	PRKX	0.00203613	0.33272	0.636	0.228	1	PEBP1	0.000223894	0.486481	1	0.988	1
EIF4A2	0.00191824	0.3794	1	1	1	PSMA2	2.05e-09	0.385923	0.947	0.827	3.79e-05	SRSF10	0.0103435	0.420095	1	0.471	1	ABT1	0.00208668	0.286078	0.818	0.368	1	TCEB2	0.000223894	0.424805	1	1	1
TSC22D3	0.00197934	0.350546	1	0.819	1	MYL1	2.36e-09	-1.12156	0.298	0.644	4.38e-05	ADAR	0.0103783	0.287996	0.667	0.247	1	DERA	0.00220108	0.296541	0.818	0.419	1	TPM1	0.000231693	0.582679	1	0.647	1
SKAP2	0.00199552	0.256135	0.545	0.254	1	RCN2	2.61e-09	0.379958	1	0.894	4.84e-05	PSMD1	0.0103799	0.294829	0.5	0.152	1	SPARCL1	0.00222614	0.399464	0.727	0.272	1	SETD3	0.000233445	0.255381	0.643	0.176	1
TNNT2	0.00202427	-0.554701	0.5	0.786	1	CTHRC1	3.39e-09	0.581772	0.895	0.601	6.29e-05	MAP4K4	0.0105392	0.364535	0.833	0.386	1	FNBP1L	0.00226744	0.399715	0.818	0.404	1	MORC4	0.000236519	0.510763	0.929	0.482	1
IER2	0.00206925	-0.606155	0.364	0.652	1	SRSF7	3.45e-09	0.446944	0.912	0.668	6.38e-05	CEBPB	0.0106026	0.380324	0.5	0.161	1	SLC25A33	0.00227688	0.252601	0.545	0.169	1	EEF1B2	0.000242242	-0.333878	1	1	1
2020-09-09	0.00214153	0.322189	0.773	0.458	1	S100A11	3.55e-09	0.417294	1	0.976	6.58e-05	2020-03-06	0.0106932	0.314089	0.833	0.399	1	RNASEH2C	0.00234702	0.374757	1	0.779	1	TUBG1	0.000243645	0.252109	0.786	0.247	1
SELM	0.00215605	-0.365356	0.682	0.87	1	GABPB1-AS1	3.74e-09	0.484922	1	0.812	6.92e-05	CSRP2	0.0108405	-0.755227	0.5	0.874	1	C16orf87	0.00234939	0.253749	0.909	0.632	1	HSPA9	0.000249414	0.406235	1	0.494	1
SNHG8	0.00218852	-0.465303	0.864	0.977	1	COL12A1	3.74e-09	-0.497993	0.439	0.779	6.92e-05	TPM1	0.0110276	0.566526	1	0.498	1	BRD3	0.00234988	0.407956	0.909	0.64	1	HIST1H4C	0.000250523	0.541753	1	0.671	1
MFAP2	0.00220552	-0.382289	0.545	0.89	1	NDUFA4	3.77e-09	0.276041	0.982	1	6.99e-05	EMILIN1	0.011094	0.432301	0.667	0.332	1	TPGS2	0.00241202	-0.422266	0.545	0.846	1	PANK3	0.000252601	0.268651	0.571	0.153	1
DAD1	0.00221313	-0.344071	0.909	0.946	1	PNN	3.8e-09	0.46763	0.947	0.721	7.03e-05	HIF3A	0.0113548	0.317042	0.833	0.417	1	PARP1	0.00241204	0.405348	0.909	0.816	1	HFE2	0.000253632	0.479585	0.786	0.271	1
ERH	0.00221494	0.305028	1	0.973	1	CSDE1	3.85e-09	0.337878	0.982	0.87	7.13e-05	PGF	0.0114374	0.378247	0.5	0.139	1	CFL2	0.0024311	0.492858	1	0.875	1	MTX2	0.00025803	0.286783	1	0.388	1
MAP2K1	0.00233024	0.283469	0.682	0.361	1	TIMM8B	3.92e-09	0.431219	0.895	0.663	7.26e-05	TRMT112	0.0115164	0.410234	1	0.915	1	BASP1	0.00243356	0.401337	1	0.801	1	H2AFZ	0.000261028	0.493487	1	0.906	1
RAMP1	0.00237955	-0.306198	0	0.311	1	MYF5	3.95e-09	-0.620792	0.018	0.447	7.32e-05	PEBP1	0.0115259	0.389787	1	0.928	1	COX6B1	0.00244999	0.291261	1	1	1	STMN1	0.000261948	0.841791	1	0.965	1
NME3	0.00238411	-0.33645	0.591	0.789	1	CDKN1B	4.28e-09	0.278961	0.667	0.274	7.92e-05	LMO4	0.0117112	-0.519055	0	0.578	1	DDX39A	0.0024841	-0.379241	0	0.507	1	ARF5	0.000265341	0.397766	0.929	0.541	1
C12orf75	0.00238918	-0.284127	0.045	0.358	1	ZYX	5.43e-09	0.289045	0.579	0.216	0.000100509	EIF3A	0.0119579	0.412411	1	0.825	1	TFAM	0.00250946	0.269171	0.818	0.375	1	TMCO1	0.000274988	0.370917	0.929	0.494	1
UXT	0.00245358	-0.31876	0.818	0.96	1	MRPL22	5.57e-09	0.356933	0.772	0.409	0.000103221	AGPAT2	0.0120161	0.421045	0.667	0.291	1	FTL	0.00251037	-0.570996	1	1	1	FAM45A	0.000282151	0.294219	0.786	0.318	1
SH3BGRL3	0.0024551	-0.39311	1	0.997	1	MFAP4	5.96e-09	-0.545363	1	0.99	0.000110431	ZNF660	0.0121055	0.259559	0.333	0.072	1	WDR60	0.00255648	0.291644	0.818	0.412	1	PHAX	0.000291042	0.287479	0.857	0.341	1
TADA3	0.00246647	0.278152	0.818	0.505	1	SHFM1	6.29e-09	0.311894	0.982	0.923	0.000116527	YPEL5	0.0122182	0.364454	0.833	0.462	1	NEB	0.00256235	1.04667	0.818	0.699	1	DZIP3	0.000292656	0.373285	0.786	0.329	1
C7orf50	0.00258016	0.340809	0.909	0.625	1	PDRG1	6.32e-09	0.340141	0.684	0.317	0.000117053	ITGAE	0.0122586	-0.447383	0	0.574	1	MED28	0.00258226	0.34497	1	0.713	1	MRPS7	0.000306155	0.293005	1	0.518	1
NDUFB11	0.00265512	-0.27722	0.909	0.97	1	RAB11B	7.56e-09	0.329948	0.895	0.639	0.000140004	TIPIN	0.0123174	0.378405	0.667	0.278	1	MOB1A	0.00260169	0.320544	0.909	0.441	1	MINOS1	0.000311333	0.421373	1	0.718	1
SYF2	0.00267132	0.310943	0.864	0.793	1	UGT2B7	9.08e-09	-0.384137	0	0.413	0.000168276	BCAT1	0.0125206	0.337549	0.667	0.242	1	DDHD1	0.00267271	0.263	0.545	0.191	1	COL12A1	0.000316598	-0.595052	0.214	0.671	1
RNF152	0.00268778	0.269315	0.136	0.023	1	VDAC3	9.28e-09	0.413631	0.965	0.707	0.000171891	PGLS	0.0125728	-0.559682	0.5	0.861	1	ATP5J	0.00276565	0.295577	1	0.978	1	PXDN	0.00032223	0.277393	0.857	0.306	1
DKK2	0.00269752	-0.345294	0.045	0.358	1	YWHAG	9.75e-09	0.283948	0.667	0.284	0.000180641	RAB30	0.0127232	0.266739	0.167	0.018	1	MYDGF	0.0027743	-0.416194	0.545	0.904	1	TMBIM4	0.000323019	0.283795	0.929	0.388	1
ROMO1	0.00277305	0.334101	0.864	0.686	1	COMT	1.01e-08	-0.406591	0.07	0.505	0.000186718	ZFHX3	0.0128275	-0.544322	0	0.57	1	MDM1	0.00277501	-0.392419	0	0.5	1	UXS1	0.000329471	0.252599	0.5	0.129	1
C1orf131	0.0028368	0.259065	0.545	0.254	1	AAK1	1.02e-08	0.282726	0.596	0.216	0.000188563	NBPF14	0.0132378	0.268756	0.5	0.166	1	NOL11	0.00283591	0.256451	0.545	0.176	1	RYK	0.000331482	0.253441	0.571	0.153	1
JUNB	0.00290739	-0.603857	0.409	0.686	1	HNRNPM	1.07e-08	0.462297	0.86	0.548	0.000197366	SCNM1	0.013287	0.250669	0.833	0.354	1	ANXA6	0.00285522	0.430022	1	0.838	1	TOMM5	0.000338441	0.272997	0.786	0.294	1
PLIN3	0.00295527	-0.279782	0.273	0.605	1	CFL2	1.2e-08	0.341403	0.947	0.894	0.00022287	PABPC1	0.0132882	0.296805	1	0.996	1	COL9A3	0.00292822	0.318517	0.455	0.147	1	ARPC2	0.000341919	0.478721	1	0.894	1
CCND2	0.00300354	-0.34059	0.636	0.809	1	PHACTR2	1.3e-08	0.325852	0.789	0.413	0.0002408	HNRNPA1	0.0132882	0.346165	1	1	1	ZNF33A	0.00294963	0.296149	0.545	0.184	1	TSPAN3	0.000344981	0.501289	0.929	0.812	1
TPR	0.0030315	0.318445	0.909	0.656	1	NDUFA13	1.4e-08	0.393786	0.947	0.76	0.000260221	COL6A3	0.0137756	-0.625616	0.333	0.798	1	ESCO2	0.00298806	0.322153	0.727	0.36	1	RP11-783K16.5	0.000348862	0.300405	0.5	0.129	1
CD320	0.00308637	-0.292492	0.136	0.448	1	GLO1	1.4e-08	0.368295	0.947	0.76	0.000260223	SMG1	0.0137971	0.255839	0.5	0.157	1	PXDN	0.00300241	0.364377	0.818	0.471	1	HK1	0.000349802	0.311963	0.571	0.153	1
PPA1	0.0032121	-0.288766	0.727	0.876	1	NIPSNAP3A	1.47e-08	0.257668	0.737	0.303	0.000273117	SURF1	0.0138452	0.29988	0.833	0.336	1	GOLM1	0.00300969	0.306009	0.909	0.537	1	SNHG8	0.000350311	-0.59276	0.929	0.988	1
PNRC1	0.00329002	0.309946	0.955	0.883	1	GTF2I	1.54e-08	0.340861	0.982	0.755	0.000285598	PRDX3	0.0138832	0.307219	1	0.641	1	NUTF2	0.00302918	0.387648	1	0.89	1	YWHAQ	0.00035851	0.422858	1	0.8	1
IDI1	0.00329796	0.526794	0.727	0.525	1	FKBP11	1.87e-08	-0.361648	0.053	0.462	0.000347217	UTP14A	0.0139235	0.417357	0.5	0.148	1	GLO1	0.00303201	0.364865	0.909	0.846	1	NDN	0.000364535	0.49495	1	0.765	1
PRDX4	0.00342338	-0.318083	0.545	0.87	1	LAMTOR5	1.9e-08	0.361144	0.982	0.918	0.00035226	YWHAZ	0.0139536	0.439928	0.833	0.673	1	NCOA1	0.00304319	0.306393	0.636	0.243	1	PKIB	0.000368696	0.330015	0.786	0.282	1
TAF7	0.0034453	0.318298	0.955	0.776	1	PPCS	2.08e-08	0.275086	0.667	0.255	0.000385472	NKAP	0.0140272	0.325736	0.833	0.359	1	MARCKSL1	0.00304455	0.494011	1	0.978	1	SKP1	0.000371047	0.473722	1	1	1
ECE1	0.00347296	0.25659	0.182	0.043	1	PSMD10	2.19e-08	0.29054	0.614	0.226	0.000405773	NEXN	0.0140605	0.262156	0.5	0.152	1	PET100	0.00305052	0.359256	0.818	0.574	1	CUL3	0.000373692	0.255671	0.571	0.141	1
PDCL	0.00373827	0.252568	0.5	0.237	1	PSMB2	2.29e-08	0.343355	0.93	0.755	0.000424757	RBM23	0.0140947	0.256373	0.667	0.233	1	TPT1-AS1	0.00309603	-0.293895	0	0.493	1	GNB2L1	0.000385492	-0.255487	1	1	1
FAM49B	0.00379701	0.253982	0.727	0.468	1	HMGB3	2.3e-08	0.365492	0.947	0.572	0.000426027	C1orf122	0.0145451	0.609	1	0.785	1	TXNDC9	0.00310447	0.328348	0.727	0.346	1	PTOV1	0.000391489	0.396488	0.929	0.694	1
RTF1	0.00395613	0.284693	0.909	0.662	1	ZNF90	2.41e-08	0.406373	0.895	0.663	0.000446253	ZNF511	0.0149399	0.27209	0.833	0.408	1	RBM17	0.00313958	0.407314	0.909	0.75	1	MGP	0.000399579	0.65858	1	0.788	1
SRSF3	0.0041269	0.369124	0.909	0.813	1	PDLIM7	2.6e-08	0.483775	0.947	0.798	0.000482329	CFAP97	0.0149713	-0.450691	0.333	0.713	1	TSPAN6	0.0031655	0.301122	0.818	0.382	1	SPATC1L	0.00040064	0.274524	0.571	0.165	1
UQCRQ	0.00413431	0.295652	1	0.913	1	HMGN2	2.65e-08	0.546208	1	0.981	0.000490418	AXL	0.0149748	0.260954	0.667	0.247	1	CPSF6	0.00321039	0.298734	0.727	0.316	1	S100A11	0.000407557	0.741268	0.929	0.941	1
PHGDH	0.00416016	-0.352548	0.818	0.913	1	FXYD6	2.95e-08	0.352846	0.895	0.639	0.0005461	RBMX	0.0149887	0.415153	1	0.928	1	SLMAP	0.00322901	0.307421	0.636	0.265	1	NDUFB7	0.000413147	0.394469	1	0.882	1
NUCB2	0.00417689	-0.323293	0.273	0.632	1	SUB1	3.15e-08	0.267939	1	1	0.000583012	MZT2A	0.0149917	-0.454909	0.833	0.937	1	CTD-2336O2.1	0.00323142	0.288756	0.818	0.463	1	RBM41	0.000413634	0.286768	0.5	0.129	1
SYNGR1	0.00423522	-0.258337	0.136	0.445	1	C7orf50	3.18e-08	0.392474	0.912	0.678	0.000589041	IFT20	0.0153312	-0.457914	0	0.552	1	CENPQ	0.00329985	0.350772	0.727	0.331	1	SUPT20H	0.000416124	0.274096	1	0.424	1
EMP3	0.00436754	-0.301176	0.909	0.983	1	WDR45B	3.24e-08	0.356473	0.789	0.486	0.000600498	GRIPAP1	0.0154563	0.324391	0.333	0.076	1	S100A4	0.00331275	-0.56846	0.273	0.779	1	SDHAF3	0.000421508	0.300384	0.786	0.306	1
MZT2A	0.00443192	-0.318241	0.909	0.96	1	TOMM22	3.27e-08	0.311659	0.982	0.861	0.000605787	HECTD1	0.0154598	0.407631	0.667	0.332	1	GUCY1B3	0.00344994	-0.33759	0	0.485	1	MRPL51	0.000429918	0.386497	1	0.894	1
LOXL1	0.00443449	-0.502654	0.636	0.809	1	BRK1	3.4e-08	0.275778	1	0.986	0.000630161	CCZ1	0.0156602	0.263501	0.667	0.247	1	RSRP1	0.00348059	-0.339862	0.364	0.676	1	VAPA	0.000440413	0.476628	1	0.835	1
KTN1	0.00445643	0.287932	0.909	0.799	1	AES	3.58e-08	0.325993	0.807	0.438	0.000663007	PSMD5-AS1	0.0156604	0.335765	0.5	0.152	1	KANK2	0.00348794	0.31423	0.818	0.463	1	VDAC3	0.000448783	0.516487	0.929	0.729	1
CDH15	0.00447021	0.312051	0.682	0.421	1	SOX4	3.72e-08	0.469337	0.982	0.798	0.000688381	POLR1D	0.0159283	-0.505746	0.833	0.951	1	PPP1R11	0.00354067	-0.356012	0.182	0.61	1	UGT2B7	0.000450145	-0.602914	0	0.541	1
MYL4	0.00449552	-0.646457	0.273	0.545	1	FILIP1	3.76e-08	0.257001	0.561	0.183	0.000697188	GOLIM4	0.0162453	0.376487	0.667	0.269	1	PNPLA8	0.00363061	0.331232	0.727	0.368	1	EBPL	0.000450549	-0.534427	0.429	0.741	1
PPIB	0.00450027	-0.311089	0.955	0.993	1	IAH1	3.89e-08	0.343908	0.842	0.481	0.000720082	IMPA2	0.0166187	0.308563	0.5	0.157	1	MT-CYB	0.00368079	0.400182	1	0.993	1	PLS3	0.000461889	0.606002	1	0.776	1
STMN1	0.00470286	0.498276	0.955	0.896	1	MYL9	4.02e-08	0.4379	0.947	0.74	0.00074374	UQCRQ	0.0167801	0.442929	1	0.861	1	SMIM20	0.00371374	-0.388885	0.455	0.735	1	BRD4	0.000480117	0.269395	0.857	0.376	1
IGFBP7	0.00482182	-0.468616	0.182	0.518	1	ARPC5	4.21e-08	0.357152	0.965	0.716	0.000780306	C11orf31	0.0168072	0.368024	1	0.762	1	ARPC5L	0.00372386	0.281324	0.909	0.507	1	UCHL1	0.000481679	0.482449	0.929	0.459	1
CRABP1	0.00491201	0.415769	0.318	0.117	1	HERC2	4.22e-08	0.258346	0.737	0.341	0.000782121	INSIG1	0.0169119	0.257897	0.333	0.072	1	UBTD2	0.00376325	0.250951	0.636	0.287	1	NUTF2	0.000488713	0.44618	1	0.812	1
THY1	0.00504521	-0.411751	0.455	0.759	1	ACSL3	4.6e-08	0.327303	0.754	0.375	0.000852795	RIOK2	0.0171307	0.255991	0.5	0.161	1	RHOB	0.0038295	-0.425421	0.273	0.669	1	SNRPF	0.000493179	0.439274	1	0.835	1
COMT	0.00520323	-0.31442	0.136	0.458	1	ANAPC16	4.77e-08	0.312098	1	0.779	0.000884247	COMMD10	0.0172973	0.312969	0.667	0.233	1	GTF2I	0.0038373	0.403867	1	0.757	1	YES1	0.000500667	0.333668	1	0.6	1
MAGED1	0.00536036	-0.278289	0.273	0.609	1	DDX3Y	5.68e-08	-0.286029	0	0.38	0.00105174	TBC1D10B	0.0175377	0.293669	0.333	0.072	1	RSU1	0.00383949	-0.290802	0	0.478	1	HRAS	0.000511195	0.295037	0.714	0.247	1
NCL	0.00537343	0.294622	0.909	0.963	1	TSPAN6	5.93e-08	0.36574	0.737	0.399	0.00109809	RNH1	0.01763	0.277059	0.833	0.498	1	SHFM1	0.00385578	0.301747	1	0.949	1	SMARCC1	0.000511626	0.315936	1	0.518	1
RPAIN	0.00543315	0.265655	0.864	0.662	1	ELN	6.34e-08	0.406673	0.754	0.399	0.00117462	NEU1	0.0176302	0.273777	0.5	0.175	1	CHCHD10	0.00396189	-0.475013	0.182	0.632	1	IMMP1L	0.000515788	0.32715	0.857	0.388	1
RGS4	0.0055563	-0.358966	0.091	0.408	1	NCOA1	6.72e-08	0.2938	0.649	0.303	0.00124455	LAPTM4A	0.0177978	-0.44145	1	0.982	1	CKS1B	0.00418581	-0.568789	0.909	0.993	1	BCAP31	0.000529506	0.320918	0.929	0.435	1
PLTP	0.00570708	-0.390056	0.5	0.656	1	PROX1	7.01e-08	0.280434	0.544	0.183	0.00129829	TOMM5	0.0180435	0.359621	0.5	0.179	1	TTN	0.00423447	0.529358	0.182	0.022	1	UTP11L	0.000533513	0.377447	0.929	0.565	1
AK1	0.00579539	-0.332514	0.591	0.742	1	SUMO1	7.22e-08	0.326919	1	0.913	0.00133727	TNRC6B	0.0180525	0.55899	1	0.641	1	COMT	0.00426794	-0.315787	0	0.471	1	RPS4X	0.000541291	-0.266606	1	1	1
TUBB2A	0.00588332	-0.361465	0.364	0.645	1	TSPYL1	7.32e-08	0.281942	0.579	0.216	0.00135659	MNAT1	0.0180593	0.331109	0.667	0.314	1	GYPC	0.00433956	0.401297	0.818	0.529	1	TMBIM6	0.000559283	0.371415	1	0.694	1
GDI2	0.00590518	0.304177	0.955	0.94	1	PARK7	7.41e-08	0.258345	1	0.99	0.001373	ATP5L	0.0181009	0.264319	1	1	1	TMSB15B	0.00435213	0.295834	0.455	0.147	1	RPL30	0.000561828	-0.253412	1	1	1
APOE	0.00594632	-0.742552	0.455	0.753	1	TTC19	7.42e-08	0.261058	0.737	0.332	0.00137385	NACA2	0.0187317	0.547704	0.667	0.417	1	NCBP3	0.00453234	0.435857	0.636	0.316	1	RABEP1	0.000572995	0.299842	0.786	0.294	1
USP8	0.00596704	0.260344	0.636	0.375	1	MZT2A	7.49e-08	-0.350991	0.842	0.947	0.0013866	CEP250	0.0188505	0.283493	0.333	0.072	1	XRCC5	0.00460743	0.410118	1	0.868	1	EIF1AX	0.000588242	0.404985	1	0.706	1
HNRNPM	0.00603568	0.365821	0.773	0.528	1	VASH2	7.68e-08	0.289681	0.526	0.192	0.00142186	CRYAB	0.0190297	-0.826554	0.167	0.726	1	JAM3	0.00461044	0.272115	0.818	0.493	1	PLOD1	0.000592916	0.257376	0.571	0.153	1
LINC00685	0.00607123	0.267844	0.636	0.365	1	CCDC80	7.7e-08	0.291502	0.649	0.303	0.00142727	CRIPT	0.0198482	0.286106	0.667	0.341	1	PPP4C	0.0046659	0.289046	0.909	0.779	1	PEF1	0.000598057	0.306204	0.786	0.341	1
IGFBP3	0.00619102	-0.60776	0.545	0.769	1	PRRC2B	8.44e-08	0.342876	0.772	0.413	0.00156357	ANXA1	0.0198498	-0.487376	0	0.525	1	RTF1	0.00468417	0.389228	1	0.779	1	C11orf58	0.000598363	0.412427	1	0.859	1
RBMX	0.00629309	0.290834	0.955	0.913	1	NDUFS8	8.55e-08	0.348345	0.947	0.803	0.00158387	MPHOSPH9	0.0199825	0.302782	0.5	0.161	1	NSA2	0.00470804	0.341345	0.909	0.868	1	SEC61G	0.000605075	0.403642	1	0.976	1
TSPO	0.00635406	-0.294943	0.955	0.98	1	MOB1A	8.93e-08	0.294252	0.684	0.327	0.00165384	PLS3	0.0201758	0.378852	0.833	0.484	1	PPA1	0.00470804	-0.425759	0.727	0.882	1	RBBP4	0.000607809	0.296519	1	0.671	1
IFT20	0.00639923	-0.307323	0.455	0.679	1	DAAM1	9.17e-08	0.326779	0.649	0.298	0.0016987	SLC44A2	0.0205674	0.307208	0.667	0.256	1	SLC30A9	0.00471534	0.325511	0.636	0.353	1	COPZ1	0.000610615	0.463491	1	0.706	1
SSR2	0.00640034	-0.257474	0.955	1	1	ZFP36L1	9.61e-08	-0.466651	0.842	0.933	0.00178103	PCOLCE	0.0209481	-0.533299	0.333	0.726	1	FXR1	0.00472614	0.426696	1	0.882	1	TBCA	0.000627878	0.391578	1	1	1
SNRPE	0.00644656	0.252174	1	0.983	1	RPIA	9.96e-08	0.297113	0.632	0.284	0.00184573	PDLIM2	0.0214373	-0.477019	0.167	0.619	1	TCEB2	0.00475294	0.308893	1	0.985	1	COX6B1	0.000627878	0.331143	1	0.988	1
FKBP7	0.00648437	-0.281711	0.5	0.686	1	AKR1C1	1.09e-07	0.339058	0.754	0.361	0.00201833	EAPP	0.0215835	-0.419649	0	0.516	1	ZFAND5	0.0047991	0.252905	0.818	0.397	1	RPL7L1	0.000630951	0.363479	1	0.671	1
ROBO1	0.0065304	0.258585	0.5	0.281	1	FOXN3	1.18e-07	0.326332	0.772	0.38	0.00217762	RSL1D1	0.021734	0.309403	1	0.951	1	MAP3K13	0.00483673	0.291258	1	0.559	1	EIF2AK4	0.000648276	0.333183	0.857	0.4	1
S100A10	0.00663492	-0.356732	1	0.99	1	ANXA1	1.22e-07	-0.477082	0.263	0.615	0.00225847	RSPRY1	0.0218561	0.328667	0.667	0.269	1	EIF3M	0.00486102	0.317649	1	0.949	1	PITX2	0.000651353	-0.582079	1	0.965	1
COX14	0.0069576	0.262282	0.727	0.478	1	GYPC	1.26e-07	0.280147	0.684	0.284	0.00234132	GLIPR2	0.0220832	0.403904	0.833	0.61	1	TMEM258	0.00497584	0.312809	1	0.985	1	SNRPG	0.000671002	0.448491	0.929	0.788	1
SEC13	0.0071651	0.278844	0.727	0.485	1	UACA	1.3e-07	0.444372	0.772	0.51	0.00240167	PITHD1	0.0226838	0.298779	0.833	0.372	1	NEAT1	0.00502404	-0.6385	0.455	0.787	1	MKRN1	0.000679765	0.308159	0.929	0.541	1
MDM1	0.00717886	-0.308985	0.182	0.448	1	COL3A1	1.3e-07	-0.425865	0.982	0.986	0.00241288	MRPS34	0.0227286	-0.458732	0.333	0.749	1	EYA4	0.00503666	0.268558	0.727	0.346	1	NSA2	0.000685244	0.441033	1	0.729	1
COL6A1	0.00733047	-0.333009	0.909	0.957	1	MMAB	1.34e-07	0.316175	0.737	0.409	0.00247376	EBPL	0.0227783	-0.519676	0.667	0.91	1	TMEM237	0.00512033	0.270093	0.727	0.463	1	PSMD10	0.000688961	0.355718	0.786	0.329	1
ZZZ3	0.00739149	0.289611	0.409	0.187	1	BZW1	1.46e-07	0.352293	0.86	0.63	0.0027023	TMEM176B	0.02283	0.3504	0.333	0.085	1	UBAP2L	0.00521577	0.302708	0.636	0.257	1	STK25	0.000697505	0.43347	0.857	0.529	1
SEMA3C	0.00776114	-0.256693	0.091	0.348	1	PTMA	1.52e-07	0.287571	1	1	0.00281454	BAZ1B	0.0228816	0.468654	0.667	0.35	1	TUBA1C	0.00526	-0.69868	0.545	0.779	1	RNASEH1	0.000698343	0.281076	0.786	0.318	1
COX8A	0.00781209	0.257786	1	0.943	1	RBP1	1.56e-07	0.49238	0.947	0.822	0.0028862	CISD1	0.022981	0.28995	0.667	0.265	1	CBWD5	0.00537008	0.256545	0.455	0.147	1	PKM	0.000700987	0.52201	1	0.965	1
REXO2	0.00825392	-0.267627	0.364	0.565	1	ATP2B1	1.69e-07	0.393579	0.667	0.337	0.00312715	UFSP2	0.023262	0.379029	0.667	0.309	1	SRI	0.00543394	0.32733	0.909	0.846	1	ATOX1	0.000708582	0.385886	1	0.812	1
SNHG18	0.008263	0.30643	0.727	0.572	1	FXR1	1.72e-07	0.325525	1	0.885	0.00319532	TSG101	0.0234417	-0.422445	0	0.507	1	CHRNA1	0.00551978	0.518714	0.636	0.353	1	SRSF3	0.000721686	0.50617	0.929	0.824	1
MSMO1	0.00829866	0.293459	0.727	0.431	1	LIMA1	1.95e-07	0.370097	0.895	0.692	0.00361775	RAB13	0.0235838	-0.479692	0.833	0.946	1	BRI3	0.00579095	0.336048	0.818	0.581	1	PRMT1	0.000731213	0.485141	1	0.8	1
C6orf62	0.00850837	0.284542	0.409	0.187	1	NDUFV3	2.09e-07	0.308622	0.877	0.5	0.00387513	FAM114A1	0.0238567	-0.456646	0.167	0.605	1	LINC00152	0.00582026	-0.336816	0	0.449	1	BAD	0.000736911	-0.384691	0.286	0.671	1
ARL2	0.00876286	-0.281535	0.773	0.876	1	ERH	2.09e-07	0.316135	0.982	0.966	0.00387947	ILF3	0.0242384	0.297692	1	0.552	1	IDI1	0.00582143	0.584678	0.818	0.713	1	STK26	0.000737783	0.333136	0.571	0.2	1
APP	0.00892928	-0.323883	0.909	0.963	1	SRRM1	2.44e-07	0.324613	0.965	0.841	0.00451362	C7orf50	0.0243328	0.485271	0.833	0.578	1	CAPN1	0.00585028	0.254482	0.636	0.279	1	SHFM1	0.000752635	0.30993	1	0.918	1
KDELR2	0.00918005	-0.336498	0.909	0.957	1	SPARCL1	2.45e-07	0.271327	0.632	0.255	0.00453522	2020-09-11	0.0244281	0.468673	0.833	0.637	1	TAF11	0.0058558	0.267504	0.818	0.456	1	POMGNT1	0.000767163	0.29963	0.786	0.306	1
EIF3A	0.00925365	0.338284	1	0.813	1	SH3GLB1	2.46e-07	0.290873	0.912	0.644	0.00455004	MAPK6	0.0256684	0.396926	0.5	0.157	1	NR2F1	0.00593566	0.361094	0.727	0.309	1	HEBP2	0.000773639	0.294435	0.857	0.435	1
HMGB3	0.00940149	0.412284	0.682	0.495	1	MGP	2.55e-07	0.394596	0.965	0.745	0.0047162	RAB7A	0.0257267	0.323341	0.833	0.552	1	SRP14	0.00596502	0.286759	1	1	1	ARF3	0.000774611	0.272392	0.786	0.282	1
ATRX	0.00942921	0.258539	0.909	0.779	1	UBE2V2	2.59e-07	0.360794	0.912	0.639	0.00480343	MORC4	0.025817	0.546361	0.5	0.206	1	SRSF2	0.00607852	0.523112	0.818	0.912	1	UBE2K	0.000791469	0.354573	0.857	0.424	1
DCTN2	0.00945322	-0.269156	0.682	0.809	1	RBBP4	2.66e-07	0.360542	0.86	0.697	0.00493436	NEK1	0.0261943	0.345301	0.5	0.188	1	E2F1	0.00608841	0.299788	0.545	0.228	1	TSPAN6	0.000805656	0.34803	0.714	0.306	1
C9orf16	0.00968967	-0.27917	0.818	0.93	1	PTGER2	2.85e-07	-0.276392	0.018	0.38	0.00527604	HIVEP3	0.0262198	0.265674	0.167	0.022	1	MFAP4	0.00609467	-0.575103	0.909	0.941	1	NBEAL1	0.00080939	0.407076	1	0.918	1
HLA-C	0.0097667	-0.331251	0.136	0.398	1	IMPDH2	3.02e-07	-0.332754	0.982	0.986	0.00558721	UQCRHL	0.0262943	0.291372	0.5	0.152	1	FHL1	0.00609676	-0.367799	0.455	0.721	1	C9orf78	0.000824793	0.296707	0.786	0.318	1
YPEL5	0.00982731	-0.255096	0.409	0.642	1	SRSF6	3.13e-07	0.302842	0.684	0.351	0.00580501	CFL2	0.0266594	0.359963	0.833	0.825	1	SPARC	0.00610044	-0.438001	1	0.993	1	NDUFS6	0.000829658	0.427945	1	0.847	1
SNAI2	0.00983663	-0.271893	0.136	0.418	1	SFPQ	3.17e-07	0.321441	0.702	0.37	0.0058708	EIF5B	0.0266951	0.315514	0.833	0.484	1	NUPR1	0.00618289	-0.582852	0.455	0.904	1	RCN2	0.000837238	0.334727	1	0.894	1
EIF4EBP1	0.0100133	-0.401939	0.682	0.873	1	MED30	3.38e-07	0.288204	0.807	0.495	0.00625551	CALM1	0.0267486	0.440634	1	0.632	1	CKS2	0.00619869	-0.957509	0.636	0.904	1	NUMA1	0.000843223	0.320547	0.786	0.282	1
EGR1	0.0105309	-0.382339	0.318	0.542	1	BIN1	3.44e-07	0.277438	0.842	0.625	0.00638059	STK26	0.0268354	0.274937	0.333	0.085	1	PSMA2	0.00626544	0.316589	1	0.824	1	EIF3J	0.000847419	0.512043	0.786	0.459	1
CSDE1	0.010725	0.270105	0.909	0.856	1	TIA1	3.47e-07	0.255319	0.632	0.279	0.00643318	TMEM183A	0.0270695	0.316167	1	0.529	1	NME3	0.00627568	-0.351662	0.455	0.779	1	LOXL1	0.000852498	0.301698	0.929	0.424	1
ATP5D	0.0108311	-0.253533	0.818	0.97	1	RPL22L1	3.54e-07	-0.434577	0.842	0.947	0.00655264	SPTSSA	0.0275586	-0.442195	0	0.489	1	H2AFY2	0.00635387	0.339578	0.818	0.581	1	MRPL20	0.000853683	0.41297	0.929	0.765	1
PEBP1	0.0111303	0.278989	0.955	0.96	1	MRPL20	3.66e-07	0.294785	0.912	0.707	0.00678211	CHMP1A	0.0276425	0.285913	0.667	0.265	1	ZMAT3	0.00643933	-0.285284	0	0.441	1	WTAP	0.000865201	0.296224	0.857	0.341	1
ALDH1A1	0.0112209	-0.405239	0.045	0.311	1	MYL6B	3.9e-07	0.367171	0.982	0.913	0.00723046	SOX11	0.0279223	0.412522	0.667	0.3	1	RBBP4	0.00651281	0.329826	0.909	0.787	1	CCDC8	0.000867299	0.342957	0.714	0.259	1
IGFBP4	0.0112747	0.344084	0.864	0.642	1	TSC22D3	3.98e-07	0.406332	0.965	0.875	0.00737621	CHPT1	0.028017	0.348602	0.667	0.318	1	TCF12	0.00654787	0.385708	0.818	0.551	1	SLC25A4	0.000875486	0.316233	0.643	0.2	1
GPX7	0.0112749	-0.255224	0.818	0.843	1	TDG	4.51e-07	0.27094	0.649	0.298	0.00835932	SERP1	0.0281069	-0.530048	0.5	0.919	1	FBXW7	0.00657603	0.313597	0.455	0.154	1	DNAJB6	0.000877594	0.438025	1	0.741	1
PPFIBP1	0.0115559	0.268712	0.727	0.502	1	NPEPPS	5.11e-07	0.272517	0.702	0.365	0.0094749	COL3A1	0.0281673	-0.468431	1	0.987	1	ASPM	0.00662212	-0.807874	0.455	0.735	1	GADD45G	0.000877594	-0.840493	0.571	0.812	1
BORCS7	0.0118403	0.266785	0.682	0.401	1	PCM1	5.17e-07	0.325563	0.895	0.558	0.00957921	PTMA	0.0281674	0.416664	1	1	1	HSPD1	0.00681968	0.335037	1	0.993	1	NMT1	0.000907132	0.268585	0.571	0.176	1
MYL9	0.0119795	-0.462437	0.636	0.886	1	ZNF706	5.2e-07	0.331835	0.895	0.774	0.00963836	MFAP4	0.0281674	-0.576648	1	0.996	1	NARS	0.00701788	0.282337	0.909	0.544	1	ARFGAP2	0.000933526	0.356055	0.714	0.271	1
IFI6	0.0122561	-0.529121	0.273	0.538	1	ALDH1A1	5.21e-07	-0.745418	0.105	0.462	0.0096556	TUBE1	0.0283575	0.291426	0.333	0.09	1	MPST	0.00711616	-0.377416	0.909	0.926	1	MT-ND1	0.000936778	0.462278	1	0.965	1
DNPH1	0.0122793	-0.306731	0.636	0.689	1	FUS	5.32e-07	0.28646	0.965	0.784	0.00984903	MPST	0.0289127	-0.449938	0.5	0.883	1	BAZ1B	0.00712486	0.38141	0.909	0.662	1	KTN1	0.000937127	0.439209	1	0.694	1
BCAT1	0.0123436	0.31019	0.591	0.388	1	KAT6B	5.33e-07	0.284609	0.632	0.293	0.00986672	KTN1	0.0292358	0.427561	0.833	0.722	1	RNF11	0.00717606	0.297997	0.636	0.265	1	NDUFA1	0.000965272	0.42695	1	0.882	1
CALD1	0.0124465	-0.399054	0.955	0.99	1	CCND2	5.38e-07	-0.456983	0.561	0.808	0.00996484	NDUFA3	0.0292371	0.30974	0.833	0.444	1	NDUFV2	0.00726921	0.323492	0.909	0.846	1	ILKAP	0.000998572	0.270507	0.714	0.282	1
NR2F2	0.0127265	0.294046	0.5	0.278	1	NR2F1	5.43e-07	0.251091	0.439	0.144	0.0100664	TGIF1	0.0292654	0.319608	0.833	0.466	1	CNBP	0.00728674	0.316909	1	0.978	1	SHD	0.00100375	0.313062	0.929	0.635	1
NDUFS5	0.0127422	-0.255259	0.909	0.997	1	C20orf27	5.51e-07	-0.340282	0.456	0.721	0.0102141	TUBA1B	0.0295166	-0.643084	0.667	0.942	1	PPP1CA	0.00730582	0.276431	1	0.765	1	OST4	0.0010064	0.323747	1	0.988	1
HMGN3	0.0129203	0.268911	0.909	0.816	1	HSBP1	5.54e-07	0.293955	1	0.952	0.010268	PPP1CB	0.0296892	0.407513	0.833	0.614	1	GBP2	0.00732938	-0.458728	0.364	0.684	1	GADD45GIP1	0.00104215	0.347221	1	0.941	1
SRRM1	0.0129648	0.293799	0.909	0.806	1	AKIRIN1	5.59e-07	0.269611	0.684	0.356	0.010356	PLXDC2	0.0298314	-0.37424	0	0.48	1	RNPS1	0.00742345	0.35069	1	0.897	1	ATP5J	0.00104253	0.295615	1	0.953	1
CBX3	0.0135452	0.31812	1	0.836	1	SRI	5.62e-07	0.41671	0.912	0.798	0.0104152	WAC	0.0307194	0.355078	0.667	0.287	1	VBP1	0.0074282	0.276482	0.909	0.809	1	ZFAS1	0.00108063	-0.289267	1	1	1
PSMB3	0.0135796	-0.286472	0.545	0.773	1	TEAD2	5.73e-07	0.260014	0.632	0.298	0.010612	PLP2	0.0314467	-0.500683	0.333	0.785	1	LMNB1	0.0074522	0.277332	0.818	0.478	1	NCBP3	0.00110018	0.277149	0.571	0.176	1
C19orf43	0.0139029	0.263279	0.955	0.903	1	TMEM230	6.02e-07	0.320313	0.947	0.736	0.0111475	AURKAIP1	0.0320539	0.301811	1	0.74	1	WWC2	0.00746462	0.2833	0.545	0.228	1	USB1	0.00111579	0.306734	0.643	0.235	1
2020-09-02	0.0140598	-0.25844	0.864	0.89	1	CD99	6.09e-07	0.313746	1	0.928	0.0112847	RP11-380D23.2	0.0322572	-0.425665	0	0.471	1	SH3GLB1	0.00757454	0.353058	0.909	0.676	1	HES6	0.00115315	0.372362	1	0.882	1
FDFT1	0.0140654	0.382596	0.727	0.515	1	EID1	6.2e-07	0.277494	1	0.99	0.0114836	ID3	0.0323877	-0.792376	0.667	0.816	1	CMTM6	0.0076091	0.338549	0.818	0.493	1	CDKN1C	0.00118948	-0.647407	0.571	0.929	1
ZFP36L1	0.0142201	-0.250196	0.955	0.97	1	PAPSS1	6.22e-07	-0.468397	0.649	0.851	0.0115278	MRGBP	0.0323891	0.273051	0.5	0.17	1	LAYN	0.00767461	-0.489164	0.273	0.684	1	IAH1	0.00119927	0.359256	0.929	0.518	1
NNMT	0.0143063	-0.309972	0.045	0.278	1	FHL1	6.25e-07	-0.377432	0.158	0.51	0.0115729	TIMP1	0.0323896	-0.533878	0.667	0.915	1	ABCF1	0.00774119	0.315483	0.818	0.544	1	MIF	0.00120151	0.697728	1	0.988	1
HSBP1	0.0146345	0.270917	1	0.926	1	TIMM44	6.51e-07	0.26602	0.667	0.317	0.0120631	FOXP1	0.0324659	0.362107	0.833	0.547	1	ZNF106	0.00774149	0.351661	1	0.75	1	MRPL23	0.0012196	0.417929	0.857	0.482	1
RP11-380D23.2	0.0151221	-0.262734	0.136	0.381	1	PTP4A2	6.89e-07	0.340491	0.877	0.611	0.0127607	RP11-356J5.12	0.0326895	0.35149	0.667	0.278	1	MRPL36	0.00783667	0.386929	0.818	0.596	1	C5orf24	0.00123199	0.408233	0.929	0.541	1
FAM234A	0.015316	0.260752	0.591	0.405	1	UBE2N	7.13e-07	0.277657	0.842	0.577	0.0132075	LRRC75A	0.0328996	0.58124	0.5	0.188	1	VRK1	0.00784741	0.261622	0.909	0.596	1	C7orf73	0.00124604	0.315256	1	0.788	1
SRSF8	0.0155503	0.254316	0.682	0.505	1	ENAH	7.78e-07	0.341683	0.842	0.615	0.014406	XPNPEP1	0.0332013	0.254331	0.5	0.211	1	DDX3Y	0.0078556	-0.27111	0	0.426	1	FGF7	0.00125357	-0.707829	0.5	0.8	1
HIST1H2AC	0.0156897	-0.302589	0.136	0.401	1	COL11A1	7.89e-07	0.316404	0.702	0.361	0.0146108	COL12A1	0.0333734	-0.530097	0.167	0.65	1	CPM	0.00785568	-0.39415	0	0.426	1	TNNT1	0.00128734	0.726134	1	0.929	1
AKR1C2	0.0156984	0.252794	0.591	0.375	1	SOX11	7.92e-07	0.279734	0.632	0.279	0.0146762	ENSA	0.0335297	-0.377088	0	0.466	1	NDUFB5	0.00791444	0.328102	1	0.882	1	CFLAR	0.001307	0.288988	0.5	0.141	1
ZRANB2	0.015825	-0.258437	0.364	0.612	1	SRSF2	8.38e-07	0.330637	0.877	0.625	0.0155144	NUCB2	0.0335297	-0.431678	0	0.466	1	MSH2	0.00791596	0.300437	0.727	0.331	1	WDR77	0.001307	0.252682	0.5	0.141	1
PLP2	0.0159248	-0.291164	0.727	0.843	1	CYTL1	8.78e-07	-0.430017	0.035	0.375	0.0162717	TMEM59	0.0335991	-0.505053	0.333	0.758	1	CXCL12	0.00793916	0.272324	0.273	0.059	1	SYCE1L	0.00130732	0.316721	0.5	0.153	1
POLR2J	0.0160089	-0.257035	0.636	0.776	1	PKM	9.07e-07	0.340199	1	0.952	0.016793	DGCR6L	0.0338183	-0.367988	0.167	0.596	1	PHF14	0.00797491	0.297364	0.909	0.735	1	SNRPD1	0.00132719	0.318794	1	0.882	1
PEX2	0.0165105	0.276242	0.682	0.508	1	RAB18	9.79e-07	0.281517	0.877	0.587	0.018134	SESTD1	0.0342688	0.389868	0.5	0.161	1	SRSF7	0.00800124	0.462498	0.909	0.89	1	CPM	0.00134257	-0.629121	0.214	0.612	1
TMEM59	0.0168159	-0.314798	0.773	0.916	1	ZNF106	1.02e-06	0.33769	1	0.909	0.018844	PPIB	0.0345252	-0.492261	0.667	0.96	1	GINS2	0.00809147	0.369098	1	0.691	1	TIMM8B	0.00134512	0.451225	0.929	0.729	1
HIST3H2A	0.016951	-0.254927	0.409	0.595	1	UTP11L	1.03e-06	0.266572	0.807	0.5	0.0191155	CITED2	0.0348434	-0.446025	0	0.462	1	CCT4	0.00821476	0.374032	1	0.846	1	JAK1	0.00135166	0.316513	0.857	0.376	1
LAMP5	0.0174469	-0.404094	0	0.211	1	EIF1AX	1.05e-06	0.33399	0.912	0.731	0.0194418	HNRNPAB	0.0349097	0.287724	0.667	0.283	1	DYNC1I2	0.00821476	0.321978	1	0.846	1	HNRNPR	0.00135576	0.429029	1	0.824	1
PPP1R14A	0.0188129	-0.351205	0.227	0.438	1	POMP	1.06e-06	0.314881	0.947	0.918	0.0196875	RABAC1	0.0350116	-0.432709	0.667	0.919	1	EIF1AX	0.00826528	0.506491	0.818	0.809	1	HMGN3	0.00135576	0.406974	1	0.824	1
HES6	0.0189857	0.295132	0.455	0.261	1	PCDH7	1.1e-06	-0.339723	0.246	0.606	0.0203428	SERPINH1	0.0350281	-0.508198	0.667	0.928	1	YTHDC1	0.00827019	0.331333	0.818	0.515	1	EIF2S2	0.00135576	0.322391	0.929	0.835	1
SNRPN	0.0190503	-0.268747	0.864	0.977	1	UBE2I	1.1e-06	0.293443	0.965	0.827	0.0204517	POLR2K	0.035794	0.338424	1	0.605	1	AP2M1	0.00830125	-0.400969	0.909	0.941	1	LINC00936	0.00138673	0.275034	0.714	0.259	1
B2M	0.0194196	-0.418385	0.955	0.983	1	TOP1	1.15e-06	0.269849	0.719	0.466	0.0212638	IDH2	0.035881	0.376797	0.833	0.619	1	PDLIM4	0.00836616	0.364761	1	0.772	1	TLK1	0.00139993	0.282127	0.571	0.165	1
SLC25A36	0.019512	0.250453	0.727	0.505	1	VIM	1.16e-06	-0.315849	1	1	0.0215248	IGSF1	0.0359669	0.621144	0.5	0.188	1	CYCS	0.00838113	0.429854	1	0.838	1	PRKDC	0.0014066	0.432684	0.857	0.541	1
SGCA	0.0198784	-0.309621	0.682	0.843	1	DYNC1I2	1.18e-06	0.310765	0.93	0.726	0.0217946	CCS	0.0361992	-0.357198	0	0.457	1	HSPE1	0.00848557	0.317838	1	0.941	1	VCP	0.00147807	0.285273	1	0.588	1
GMDS	0.0198855	0.286952	0.5	0.278	1	SGSM3	1.22e-06	0.2635	0.596	0.288	0.0225424	GNG5	0.0364456	0.305227	1	0.852	1	COL6A1	0.00885184	-0.516324	0.818	0.934	1	LINC00969	0.00151304	0.30923	0.643	0.282	1
CHN1	0.0200939	-0.263615	0.182	0.438	1	PSMD1	1.22e-06	0.251674	0.561	0.231	0.0226124	LDOC1	0.0369214	0.306596	0.833	0.552	1	SEC61G	0.00905774	0.37239	1	0.963	1	PHPT1	0.00153319	0.372132	1	0.953	1
PTP4A2	0.0201479	0.285305	0.773	0.542	1	BNIP3L	1.25e-06	0.274599	1	0.769	0.0231985	NES	0.0372646	0.687287	0.667	0.426	1	ACO2	0.00917369	0.297321	0.727	0.456	1	RBM42	0.00161242	0.303063	0.786	0.365	1
MED4	0.0203679	0.26295	0.727	0.535	1	SFRP1	1.31e-06	0.32252	0.649	0.327	0.0242437	ASNA1	0.037598	-0.348194	0	0.453	1	COL12A1	0.00937825	-0.450397	0.455	0.787	1	ZFP36L1	0.00163705	-0.580578	0.714	0.824	1
HNRNPK	0.0206198	0.276521	0.955	0.953	1	TCF4	1.36e-06	0.285086	0.947	0.712	0.0252671	NFE2L2	0.0375981	-0.370217	0	0.453	1	NDUFA13	0.00937978	0.345947	0.909	0.868	1	RTF1	0.00163955	0.415577	0.929	0.682	1
GLO1	0.0209846	0.26263	0.773	0.682	1	RABAC1	1.37e-06	-0.321589	0.947	0.966	0.0252973	SFXN1	0.0375981	-0.4192	0	0.453	1	RALGPS2	0.00948506	0.402441	0.636	0.346	1	RPAIN	0.00167001	0.335879	1	0.706	1
TMEM47	0.021246	-0.282927	0.455	0.625	1	COX8A	1.39e-06	0.282101	0.982	0.947	0.0257854	FHL3	0.0381513	-0.410055	0.167	0.565	1	FEN1	0.00983364	0.35185	0.727	0.485	1	HIF1A	0.00167065	0.275378	0.857	0.388	1
EIF4G2	0.021745	0.427283	0.818	0.853	1	DDX5	1.4e-06	0.353866	0.982	0.87	0.0259518	ARPC5	0.0383174	-0.41336	0.167	0.632	1	RBBP7	0.00993049	0.487465	0.909	0.801	1	ACVR2B	0.00167519	0.273573	0.857	0.353	1
KCNQ1OT1	0.0228927	0.48604	0.909	0.906	1	TCF12	1.42e-06	0.312808	0.789	0.471	0.0262726	EML4	0.0383174	-0.404286	0.167	0.632	1	BZW1	0.00997729	0.35045	1	0.779	1	STARD3NL	0.00170224	0.279533	0.786	0.4	1
PHAX	0.0230975	0.282513	0.636	0.395	1	KTN1	1.53e-06	0.317547	0.965	0.808	0.0283508	MYL12B	0.0384075	-0.415229	0.833	0.928	1	ERCC1	0.0104349	0.319768	1	0.684	1	OAT	0.00172037	0.253731	0.643	0.235	1
GPM6B	0.0239766	0.404608	0.773	0.682	1	HIF1A	1.72e-06	0.258881	0.719	0.365	0.0318959	COX5A	0.038425	-0.37991	0.667	0.946	1	COQ4	0.010507	-0.260887	0.091	0.544	1	BASP1	0.00174342	0.455595	0.857	0.541	1
STC1	0.0247294	0.336845	0.455	0.281	1	ATP5J	1.78e-06	0.280213	1	0.942	0.0330578	HMGN2	0.0384471	0.315747	1	0.996	1	ANAPC13	0.0106685	0.271825	1	0.787	1	GTPBP4	0.00175376	0.385732	0.786	0.376	1
C4orf3	0.0249126	0.275274	0.955	0.916	1	HNRNPK	1.8e-06	0.315817	1	0.933	0.0333583	NASP	0.038899	0.364413	0.667	0.381	1	C6orf62	0.0108185	0.282066	0.636	0.301	1	MRPL52	0.00176357	0.391469	1	0.659	1
GBP2	0.0250179	-0.31163	0.455	0.609	1	NPW	1.82e-06	-0.357911	0.035	0.361	0.0336216	C22orf39	0.0389016	0.296276	0.667	0.309	1	IGFBP4	0.0110368	0.372231	0.818	0.632	1	FGD5-AS1	0.0017652	0.274654	0.786	0.341	1
NHLRC3	0.0251977	0.263971	0.591	0.391	1	OXCT1	1.87e-06	0.293747	0.561	0.245	0.0345771	FHL1	0.0390412	-0.374088	0	0.448	1	WBP4	0.0111562	0.256765	0.636	0.353	1	QPRT	0.00177722	0.499196	1	0.741	1
MAP1LC3A	0.0279057	-0.253124	0.364	0.612	1	ACTC1	2.03e-06	-0.916964	0.947	0.957	0.0376685	PRICKLE1	0.0392573	0.295632	0.333	0.099	1	CNP	0.011392	0.250611	0.727	0.404	1	ACTN1	0.00178713	0.280559	0.643	0.212	1
TRAM1	0.0279871	-0.28131	0.773	0.776	1	PIN4	2.05e-06	0.290004	0.877	0.639	0.0379543	TCEB2	0.0396306	0.348725	1	0.978	1	UACA	0.0115152	0.37076	0.818	0.588	1	IFITM3	0.00178929	0.36313	1	0.706	1
PPP1R14B	0.0289317	0.344954	0.727	0.532	1	PSMB1	2.06e-06	0.262261	1	0.942	0.0382174	MANF	0.0396692	-0.453662	0.167	0.65	1	RARS	0.0117671	0.290405	0.818	0.434	1	ELAVL1	0.00179255	0.328885	0.929	0.494	1
FDPS	0.0296141	0.361212	0.682	0.515	1	GBP2	2.1e-06	-0.386827	0.421	0.74	0.0388499	CD151	0.0397282	-0.438889	0.167	0.717	1	MXD3	0.0118083	-0.513148	0.364	0.699	1	OFD1	0.00182938	0.267711	0.786	0.424	1
CXCL14	0.0301515	-0.332115	0	0.181	1	UGP2	2.22e-06	0.314693	0.754	0.486	0.0411841	PDHA1	0.0397667	0.317372	0.667	0.314	1	PPDPF	0.0119332	0.295817	1	1	1	UBE2G1	0.00183442	0.27815	0.714	0.318	1
NDUFA4L2	0.0304446	0.616214	0.727	0.498	1	HP1BP3	2.26e-06	0.274888	0.842	0.572	0.0418849	FABP5	0.0399094	-0.77963	0.667	0.857	1	PFN2	0.0119332	-0.342098	1	1	1	ANK2	0.00188867	0.284658	0.571	0.212	1
PFN2	0.0311396	-0.26302	0.909	0.993	1	RP11-380D23.2	2.33e-06	-0.310117	0.105	0.438	0.0431184	MLLT3	0.0399778	-0.446277	0.167	0.57	1	GABPB1-AS1	0.0121867	0.448122	0.818	0.706	1	ABCF1	0.00189409	0.327536	0.714	0.365	1
ITM2A	0.031651	-0.299198	0.636	0.843	1	BRI3	2.33e-06	0.332072	0.702	0.423	0.0431606	ENOPH1	0.0400148	0.270188	0.667	0.3	1	REST	0.0122124	0.362975	0.727	0.463	1	APLP2	0.00190593	0.253765	0.786	0.341	1
SETD5	0.0323487	0.372563	0.818	0.592	1	UQCC2	2.36e-06	0.347931	0.877	0.712	0.0437171	NDUFC2	0.0400628	0.403575	1	0.753	1	EXOSC3	0.0122841	0.351563	0.636	0.353	1	AKAP9	0.00193491	0.265407	1	0.871	1
HCFC1R1	0.0329333	-0.308965	0.818	0.849	1	ETHE1	2.49e-06	-0.311937	0.386	0.659	0.0461299	PCBP4	0.0401073	0.294396	0.833	0.462	1	MDFI	0.0126059	0.304012	1	0.86	1	MED21	0.00197537	0.31764	0.786	0.4	1
CCDC80	0.0343432	0.295915	0.727	0.548	1	MAP4K4	2.52e-06	0.269542	0.772	0.433	0.0466153	PSMB5	0.0408466	-0.322559	1	0.982	1	APMAP	0.0131864	0.308048	0.818	0.544	1	TTC19	0.00198195	0.253741	0.643	0.247	1
COL6A2	0.0346413	-0.258035	0.909	0.96	1	THEMIS2	2.93e-06	-0.335307	0.228	0.562	0.0542262	PPP1R2	0.041279	0.309636	0.5	0.215	1	POLR2J3	0.0132298	0.269198	0.909	0.625	1	ENAH	0.00199734	0.290741	1	0.859	1
ITGA11	0.0372866	0.293762	0.273	0.11	1	PET100	3.08e-06	0.258634	0.877	0.562	0.0570278	NEAT1	0.0418146	-0.654207	0.5	0.744	1	MGST3	0.0132362	-0.33034	0.909	0.971	1	LPAR4	0.00200759	-0.503657	0.214	0.647	1
PMP22	0.0377095	-0.309686	0.727	0.756	1	BBIP1	3.09e-06	0.282292	0.596	0.308	0.0573154	COL14A1	0.042064	-0.372044	0	0.439	1	C12orf65	0.0132441	-0.319217	0.273	0.669	1	BRK1	0.00201581	0.275541	1	1	1
GAP43	0.0380784	-0.306696	0.045	0.231	1	SNRPD3	3.17e-06	0.283017	0.895	0.697	0.058723	PLAC9	0.042064	-0.495565	0	0.439	1	PDLIM7	0.0134381	0.417742	0.909	0.75	1	SCOC	0.00202519	0.294491	1	0.588	1
CTHRC1	0.0390795	0.317225	0.727	0.562	1	KCNQ1OT1	3.28e-06	0.366914	0.982	0.947	0.060738	MARCKSL1	0.0420938	0.378217	1	0.987	1	UBE2T	0.0136481	0.361362	0.909	0.662	1	YWHAZ	0.00205166	0.486861	0.929	0.718	1
CYTL1	0.0403027	-0.435016	0.273	0.478	1	GLIPR2	3.29e-06	0.291941	0.965	0.75	0.0610279	EMP3	0.0424064	-0.419962	0.833	0.969	1	ORC4	0.0136727	0.3248	0.727	0.36	1	SMDT1	0.002066	0.356293	1	0.859	1
COL12A1	0.0405572	-0.311182	0.682	0.753	1	HNRNPA2B1	3.44e-06	0.331576	1	0.938	0.0636598	ZNF652	0.0424893	0.319531	0.5	0.206	1	MSMO1	0.0137495	0.416058	0.727	0.485	1	COL3A1	0.00208981	-0.79975	0.786	0.871	1
CD63	0.0414848	-0.256781	0.955	1	1	RCAN2	3.45e-06	-0.254025	0.035	0.351	0.0639053	FTL	0.0427295	-0.329628	1	1	1	PCDH7	0.0138561	-0.350972	0.273	0.603	1	BCAT1	0.00209575	0.270818	0.929	0.459	1
RTN4	0.0426992	-0.253281	0.818	0.873	1	THOC7	3.45e-06	0.313825	0.807	0.51	0.0639813	EIF1AX	0.0431141	0.320828	1	0.578	1	ESF1	0.0139571	0.363796	0.727	0.463	1	CCDC43	0.00213641	0.335363	0.714	0.353	1
HNRNPU	0.0429951	0.28962	0.909	0.692	1	FAM133B	3.6e-06	0.262631	0.772	0.409	0.0665987	SNAPC2	0.0432704	0.347349	0.667	0.341	1	HSPA4	0.0140113	0.308279	0.727	0.404	1	PRRC2C	0.00217298	0.378648	1	0.8	1
TGFBI	0.0430872	-0.310717	0.136	0.338	1	LSM4	3.81e-06	0.351222	0.947	0.827	0.0705229	PTGES3	0.0433132	-0.416934	0.667	0.924	1	PBK	0.0141252	-0.486378	0.364	0.64	1	POLR2K	0.00217814	0.276581	0.929	0.624	1
CCND1	0.0436679	0.26341	0.591	0.378	1	PYURF	3.83e-06	0.284531	0.965	0.75	0.0710141	IGFBP2	0.0434836	0.515483	0.667	0.422	1	USP46	0.014277	0.276666	0.636	0.294	1	PCID2	0.00218431	0.294956	0.857	0.424	1
ZFX	0.0445544	0.444124	0.364	0.197	1	DNAJC8	3.91e-06	0.354086	0.947	0.764	0.0724187	COL6A1	0.0439794	-0.4561	0.333	0.825	1	UQCR11	0.0143658	0.368658	1	0.949	1	TUBB4B	0.00221732	0.458282	0.714	0.306	1
NREP	0.0445954	0.355497	0.818	0.749	1	UXT	4.21e-06	-0.283912	0.895	0.981	0.0779821	ZNF622	0.0441903	0.303775	0.5	0.193	1	MYL12B	0.0143677	-0.371545	0.818	0.971	1	NUDT3	0.00224013	0.321064	0.857	0.459	1
PENK	0.0482994	-0.401025	0	0.154	1	RANBP1	4.55e-06	0.290553	0.947	0.827	0.0842886	SLIRP	0.0447023	0.304101	0.833	0.543	1	TRA2B	0.0143961	0.256528	0.909	0.787	1	PSMA1	0.00229389	0.343198	1	0.882	1
AMD1	0.048462	0.293679	0.545	0.321	1	VDAC1	4.65e-06	0.258747	0.93	0.856	0.0860914	ZSCAN16-AS1	0.0447365	0.423697	0.667	0.372	1	PLXNC1	0.0146965	0.284504	0.364	0.118	1	JOSD2	0.00230397	0.277328	0.786	0.341	1
TRPS1	0.057224	0.35509	0.227	0.107	1	PPIC	4.66e-06	0.284357	0.649	0.346	0.0864003	DNAJC15	0.0452762	-0.341132	0	0.43	1	PSMA3	0.0147112	0.288172	0.909	0.713	1	CCT3	0.00237861	0.375778	1	0.776	1
YTHDF2	0.0578835	0.270037	0.545	0.415	1	NDN	4.73e-06	0.377467	0.982	0.88	0.0876073	P3H1	0.0452762	-0.355274	0	0.43	1	SOX11	0.0147204	0.470877	0.818	0.515	1	PTMA	0.00238404	0.356841	1	1	1
NACA2	0.058695	0.274689	0.545	0.355	1	SREK1IP1	4.75e-06	0.266716	0.649	0.341	0.0880438	ARL6IP6	0.0453464	0.317448	0.5	0.229	1	ALDOA	0.0149689	-0.377982	1	0.993	1	SCD	0.00240971	0.274319	0.5	0.165	1
REEP3	0.0615816	0.259221	0.682	0.431	1	C17orf89	4.79e-06	0.297313	0.807	0.562	0.0886536	ATP5O	0.0453523	0.284418	1	0.982	1	PRDX2	0.0152749	0.271064	1	0.971	1	ARPC5	0.00241035	0.404393	1	0.635	1
GYPC	0.0656968	0.264366	0.591	0.448	1	CBX5	4.87e-06	0.277498	0.877	0.562	0.0901685	TAGLN	0.0459261	-0.629552	0.333	0.655	1	NCKAP5	0.015316	0.294873	0.364	0.11	1	STRAP	0.00244483	0.357599	1	0.765	1
TPM2	0.0671885	-0.251121	0.955	0.97	1	TMSB4X	4.98e-06	0.280626	1	1	0.0923014	HIST1H1D	0.0462049	-0.468613	0.167	0.547	1	KRT10	0.0154235	-0.339225	0.727	0.963	1	RPL36A	0.0024647	0.259734	1	1	1
SFPQ	0.0674483	0.292394	0.455	0.298	1	SSR3	5.2e-06	-0.334232	0.877	0.918	0.0963619	CDH13	0.0462262	0.385411	0.333	0.094	1	S100A16	0.0154574	-0.293619	0.364	0.706	1	DDX1	0.0024835	0.333799	0.786	0.341	1
ACTC1	0.0680765	-0.868905	0.364	0.512	1	AKIRIN2	5.2e-06	0.282647	0.614	0.312	0.0963711	IMP4	0.0463061	0.27597	0.667	0.332	1	TANK	0.015581	0.278954	0.727	0.382	1	PLEKHO1	0.00250021	0.283282	0.714	0.318	1
UFSP2	0.0716576	0.300034	0.5	0.418	1	PFDN2	5.21e-06	0.290492	0.912	0.745	0.0964443	SET	0.0464156	0.427342	1	0.857	1	LIMA1	0.0156401	0.324343	0.818	0.544	1	SCRIB	0.00251865	0.289015	0.643	0.212	1
BAZ1B	0.0741647	0.275263	0.591	0.391	1	PCBP2	5.27e-06	0.270502	1	0.976	0.0975846	ZNF703	0.0464232	0.371607	0.667	0.345	1	IGSF1	0.0157324	0.292076	0.364	0.118	1	CBX3	0.00252548	0.391139	1	0.859	1
PAPSS1	0.0758164	-0.281489	0.727	0.819	1	SNHG18	5.35e-06	0.258962	0.684	0.38	0.0990436	B2M	0.0467145	-0.439557	1	0.987	1	AC013461.1	0.0157333	0.38979	0.818	0.559	1	ATP6V1G1	0.00254346	0.314996	1	0.918	1
ASPN	0.0807628	-0.314807	0.045	0.204	1	LINC00685	5.39e-06	0.252362	0.807	0.49	0.0997817	ATIC	0.0471842	0.384204	0.5	0.229	1	CCNB1IP1	0.0158512	-0.326703	0.636	0.919	1	MAP2K1	0.00255455	0.348761	0.643	0.259	1
SET	0.0869901	0.434704	0.955	0.88	1	UBB	5.39e-06	0.30035	1	0.99	0.0998795	PRL	0.0473933	0.326551	0.5	0.211	1	ACAT2	0.015937	0.399386	0.455	0.191	1	ANXA5	0.00263182	0.407612	1	0.824	1
PYCR1	0.0881366	-0.283395	0.636	0.702	1	RHOBTB3	5.54e-06	0.296515	0.982	0.865	0.102671	NELFA	0.047465	0.277408	0.5	0.197	1	RB1	0.0160455	0.322541	0.636	0.397	1	MRPL22	0.00265801	0.272417	0.857	0.447	1
SIX1	0.0912236	0.262293	0.636	0.548	1	PLS3	5.54e-06	0.317591	0.895	0.76	0.102683	NDUFA2	0.0477839	0.445199	0.833	0.682	1	PAXBP1	0.0162325	0.302046	0.455	0.206	1	CNPY2	0.00269809	0.288912	0.857	0.6	1
FN1	0.0993522	-0.392877	0.409	0.555	1	GTF3C6	6.23e-06	0.277096	0.754	0.471	0.115409	PELP1	0.0478992	0.277387	0.333	0.103	1	C8orf33	0.016289	0.294135	0.636	0.419	1	CCNG1	0.00271495	0.300023	1	0.906	1
XRN2	0.0994118	0.262811	0.682	0.612	1	CAV3	6.34e-06	-0.392647	0.404	0.668	0.117431	CHMP2A	0.0479526	-0.383776	0.5	0.843	1	BAZ1A	0.0164598	0.311757	0.727	0.515	1	NDUFA2	0.00274408	0.381931	1	0.8	1
ATP5J2	0.102622	0.294933	0.864	0.87	1	YWHAZ	6.74e-06	0.317444	0.93	0.712	0.12485	2020-09-02	0.0482871	-0.413427	0.5	0.785	1	PRL	0.0166077	0.304586	0.545	0.228	1	RBM39	0.00284529	0.354513	0.929	0.894	1
DKK1	0.10753	-0.313605	0	0.107	1	FDFT1	7.17e-06	0.33042	0.825	0.553	0.132801	TAX1BP1	0.048474	0.275992	1	0.574	1	FOXN3	0.0168159	0.311301	0.818	0.449	1	SF1	0.00286632	0.272215	0.857	0.459	1
CDKN1A	0.112149	-0.261204	0.136	0.284	1	BOD1	7.51e-06	0.272287	0.86	0.62	0.13913	SDCBP	0.0485548	-0.451264	0.333	0.686	1	NDUFA1	0.0168815	0.290185	0.909	0.846	1	SLTM	0.00286707	0.478473	0.857	0.518	1
CA9	0.112654	0.336652	0.364	0.234	1	YWHAB	7.71e-06	0.334973	0.912	0.74	0.14273	H1F0	0.0486793	-0.532275	0.5	0.812	1	CRYAB	0.017066	-0.871157	0.545	0.699	1	UROS	0.00290614	0.325296	0.786	0.435	1
C11orf31	0.127383	0.268978	0.773	0.819	1	SELT	7.97e-06	0.260348	0.719	0.418	0.147545	CAV1	0.0486868	-0.438152	0	0.422	1	HSPA9	0.0176084	0.256657	0.818	0.529	1	CALD1	0.00290639	-0.594328	0.929	0.976	1
HMGB2	0.153995	0.291866	0.636	0.462	1	ATOX1	8.12e-06	0.26051	0.965	0.784	0.150477	FXR1	0.0490222	0.383348	1	0.83	1	PYURF	0.0176186	0.295153	0.909	0.86	1	SERBP1	0.00299587	0.43673	1	0.906	1
ID2	0.157523	-0.318816	0.318	0.435	1	ID3	8.89e-06	-0.513223	0.719	0.913	0.164766	MYOD1	0.0495844	0.250714	0.667	0.327	1	SAFB	0.0176941	0.284171	0.727	0.5	1	UBE2R2	0.00301027	0.309952	0.786	0.435	1
POSTN	0.162896	-0.31943	0.091	0.204	1	DNAJB11	8.93e-06	0.290649	0.772	0.514	0.165353	FAM96A	0.0497329	0.253023	0.833	0.404	1	FXYD6	0.0179863	0.367237	0.909	0.787	1	RNMT	0.00304679	0.437951	1	0.635	1
H2AFZ	0.187674	0.29467	0.955	0.96	1	RTF1	9.37e-06	0.263912	0.912	0.707	0.173643	PWWP2A	0.0497558	0.273949	0.5	0.17	1	H2AFY	0.0180142	0.351405	1	0.816	1	TCEAL7	0.00306421	0.534929	0.929	0.541	1
TMEM45A	0.191871	-0.261071	0.682	0.736	1	COX7B	9.55e-06	0.281681	1	0.947	0.176861	SNF8	0.0499741	0.256506	0.833	0.511	1	ERCC6L2	0.0182431	0.386313	0.455	0.199	1	COX17	0.00306476	0.413102	0.929	0.718	1
ENO2	0.194524	0.281172	0.455	0.351	1	CETN2	9.74e-06	0.259741	0.754	0.49	0.180503	ARPC2	0.0500374	-0.377502	0.833	0.874	1	UBE2E2	0.0183859	0.304602	0.727	0.368	1	PRDX2	0.00309782	0.520458	0.929	0.929	1
EFNB3	0.226489	-0.286014	0.136	0.234	1	KHDRBS1	1.06e-05	0.259322	0.93	0.774	0.197116	SUMF2	0.0504692	-0.34379	0	0.417	1	NDUFB2	0.0184096	0.274859	1	0.824	1	RAB7A	0.00311871	0.302466	0.929	0.682	1
TUBA1A	0.238155	-0.296194	0.909	0.93	1	APEX1	1.07e-05	0.281868	0.982	0.904	0.197999	PCGF2	0.0504693	-0.336487	0	0.417	1	LUC7L3	0.0186519	0.305223	1	0.934	1	LLNLR-245B6.1	0.00316457	0.298355	0.786	0.4	1
AFF3	0.270266	0.25932	0.318	0.221	1	YWHAE	1.08e-05	0.256	0.982	0.986	0.19989	ATF7IP	0.0504693	-0.345049	0	0.417	1	EXOC5	0.0189388	0.251367	0.909	0.522	1	C11orf31	0.00319763	0.396905	1	0.906	1
ISG15	0.287607	-0.427277	0.318	0.381	1	EIF3J	1.08e-05	0.274255	0.789	0.529	0.200517	LRP12	0.0505605	0.304415	0.333	0.103	1	DTL	0.0190244	0.301764	0.545	0.272	1	TCF4	0.00327627	0.302109	1	0.671	1
LHFP	0.30187	0.285439	0.591	0.455	1	MT-ATP6	1.08e-05	0.314679	1	0.986	0.200794	RPAIN	0.0515648	0.336804	0.833	0.709	1	PTTG1	0.0190927	-1.12695	0.727	0.801	1	GLT8D2	0.0032922	-0.487753	0.143	0.576	1
CLEC3A	0.31495	-0.307636	0.045	0.11	1	KDELR3	1.09e-05	-0.252916	0.14	0.452	0.201224	CCDC66	0.0517436	0.332468	0.833	0.457	1	CCDC167	0.0191722	-0.390286	0.636	0.794	1	COX6A1	0.00331083	0.325884	1	0.965	1
FABP5	0.321293	-0.335357	0.864	0.906	1	PRDX5	1.11e-05	0.284642	1	0.942	0.205165	GAS2L1	0.0518663	0.272661	0.333	0.108	1	PPIF	0.0192747	0.293553	0.636	0.404	1	H3F3A	0.00331122	0.272266	1	1	1
ACTG2	0.334718	-0.561438	0.591	0.622	1	GTF2H5	1.18e-05	0.320833	0.93	0.803	0.217674	MRPL11	0.0519502	0.258056	1	0.659	1	FKBP2	0.0193236	-0.355868	0.636	0.904	1	DHX29	0.00336052	0.326888	0.714	0.341	1
MT2A	0.49474	-0.262528	0.091	0.14	1	NDUFA11	1.18e-05	0.273181	1	0.904	0.218696	KIF1A	0.0521822	0.370516	0.5	0.206	1	SNAPIN	0.0194041	0.261498	0.818	0.537	1	COMT	0.0033759	-0.429256	0	0.424	1
CTNNAL1	0.495359	0.262518	0.318	0.274	1	NFIB	1.19e-05	0.313057	0.912	0.74	0.220787	DDRGK1	0.0523047	-0.305442	0	0.413	1	UBL5	0.0198015	0.251546	1	0.971	1	ACTA2	0.00342362	0.685639	0.929	0.694	1
AGGF1	0.518716	0.255907	0.409	0.371	1	CKAP4	1.28e-05	0.260502	0.737	0.428	0.237857	NRBP1	0.0523047	-0.346423	0	0.413	1	SNX3	0.0198022	-0.286927	1	0.978	1	SIX1	0.00347599	0.380913	1	0.588	1
FABP7	0.520077	-0.486251	0.227	0.261	1	PRDX2	1.32e-05	0.279184	0.982	0.938	0.245219	ENAH	0.053062	0.34403	0.833	0.489	1	ZFAS1	0.0198028	-0.27819	1	1	1	EIF2B1	0.00347716	0.279077	0.5	0.165	1
DOK5	0.533147	0.268399	0.136	0.1	1	POLD2	1.33e-05	0.277772	0.877	0.659	0.246352	HMGN3	0.0538534	0.311498	1	0.794	1	WWTR1	0.0198235	0.286994	0.727	0.39	1	PNISR	0.00352854	0.406638	1	0.929	1
CLU	0.552544	-0.329092	0.727	0.575	1	MORC4	1.33e-05	0.293264	0.719	0.394	0.246889	OTUB1	0.0539094	0.364226	0.667	0.318	1	IER3	0.0199299	-0.255957	0	0.353	1	MT-ND2	0.00353201	0.335953	1	0.976	1
LY6H	0.662812	-0.29627	0.227	0.261	1	ARMCX2	1.36e-05	0.263256	0.825	0.534	0.251893	FAM200B	0.0539619	-0.386359	0.167	0.534	1	NCAPD2	0.0199749	-0.268707	0.091	0.493	1	AES	0.0035355	0.315826	0.857	0.494	1
ATP1B1	0.760119	-0.329163	0.182	0.201	1	S100A4	1.36e-05	-0.6642	0.439	0.649	0.252299	IFT27	0.0541944	-0.305063	0	0.408	1	HES6	0.0203592	0.449141	0.727	0.493	1	SRSF9	0.00363355	0.283976	0.857	0.447	1
NTRK2	0.880708	-0.272362	0.364	0.344	1	DDX21	1.37e-05	0.266512	0.544	0.255	0.252909	KDELR3	0.0541944	-0.327646	0	0.408	1	CHMP2B	0.020438	0.275429	0.727	0.404	1	PET100	0.00363422	0.340282	0.786	0.529	1
						GNG5	1.38e-05	0.268868	0.982	0.889	0.25487	RBBP4	0.054475	0.382451	0.833	0.668	1	MRPL16	0.0204906	0.257643	0.727	0.478	1	DYNLRB1	0.00363495	0.252738	1	0.894	1
						DNPH1	1.48e-05	-0.26839	0.439	0.721	0.274613	COX6C	0.0548168	0.329925	1	0.946	1	DDX55	0.0205666	0.276183	0.455	0.184	1	CSNK1E	0.00364766	0.329506	0.786	0.376	1
						FAM45A	1.49e-05	0.266922	0.579	0.317	0.276922	SYNC	0.0552866	0.311848	0.5	0.242	1	GPAA1	0.0205791	-0.296188	0.455	0.662	1	TMEM230	0.00366908	0.340843	0.929	0.741	1
						TCEB1	1.61e-05	0.294928	0.877	0.784	0.297505	KCNQ1OT1	0.0555682	0.443591	1	0.919	1	C8orf88	0.020602	0.398595	0.545	0.294	1	FAM127A	0.00371759	0.336777	1	0.835	1
						PRKCB	1.61e-05	0.341419	0.614	0.341	0.297606	SMIM20	0.0556304	-0.390257	0.167	0.534	1	CD151	0.0208828	-0.335778	0.818	0.882	1	ANXA7	0.00374939	0.380415	0.714	0.341	1
						SCAND1	1.63e-05	0.25812	0.912	0.721	0.302742	SERTAD2	0.0563086	0.298513	0.5	0.233	1	UPF3B	0.0208831	-0.292074	0.364	0.625	1	CAV3	0.00376526	-0.461263	1	0.953	1
						FDPS	1.7e-05	0.350317	0.895	0.649	0.31496	RAB1A	0.0563927	-0.416772	0.333	0.74	1	COX7A2	0.0210003	0.320665	1	0.993	1	MAPKAP1	0.00376877	0.263884	0.786	0.365	1
						UCHL1	1.73e-05	0.329429	0.842	0.529	0.319575	VDAC2	0.0564166	0.335102	1	0.951	1	ACTR1A	0.0210043	0.278135	0.818	0.485	1	TIPIN	0.00377597	0.25323	0.714	0.306	1
						EIF3A	1.75e-05	0.273957	0.965	0.832	0.324534	TMED4	0.0564572	0.393902	0.833	0.574	1	MCM3	0.021036	0.35049	0.818	0.515	1	NDUFAF3	0.0037893	0.37047	1	0.729	1
						UROS	1.78e-05	0.29561	0.684	0.399	0.329701	CBX5	0.0568574	0.279798	0.833	0.556	1	H1F0	0.0214429	-0.373491	0.273	0.772	1	POLDIP2	0.00383976	0.31354	0.786	0.435	1
						PARP1	1.9e-05	0.341824	0.86	0.683	0.351198	ROMO1	0.0569406	0.419032	1	0.547	1	HHIP	0.0217574	-0.265168	0	0.346	1	TMSB10	0.00388867	0.368146	1	1	1
						UBE3A	1.94e-05	0.266645	0.754	0.481	0.358694	TP53I13	0.0581413	-0.32469	0	0.399	1	HSPB1	0.0222606	0.254086	1	0.993	1	ARID4B	0.00391548	0.256435	0.857	0.482	1
						STXBP6	1.94e-05	-0.332725	0.298	0.562	0.358866	CTD-2034I4.2	0.0581413	-0.332921	0	0.399	1	CHAF1A	0.022271	0.280066	0.727	0.478	1	ARPP19	0.00396911	0.260299	0.929	0.624	1
						SET	2.03e-05	0.289893	0.947	0.875	0.376864	ZNF830	0.0582729	0.322821	0.5	0.197	1	PRMT2	0.0229889	-0.250238	0.818	0.875	1	HSBP1	0.00401414	0.285459	1	0.965	1
						GOLGA4	2.06e-05	0.329651	0.772	0.553	0.381581	UVRAG	0.0585777	0.293509	0.5	0.202	1	PLEKHO1	0.0231622	0.253016	0.727	0.441	1	CNN3	0.00401448	-0.465498	1	1	1
						TCEAL1	2.15e-05	0.253489	0.649	0.37	0.397585	IGFN1	0.0587675	0.440453	0.333	0.112	1	NUSAP1	0.0232024	-0.6642	0.636	0.838	1	PDLIM7	0.0040795	0.520424	0.929	0.835	1
						S100A13	2.47e-05	-0.331419	0.807	0.889	0.45684	ATP6V0E1	0.0587711	-0.39359	0.5	0.812	1	RUNX1T1	0.0235034	0.462985	0.636	0.412	1	CHMP6	0.0041903	0.285119	0.5	0.176	1
						HNRNPA3	2.74e-05	0.282078	0.982	0.923	0.506666	TATDN1	0.0592874	-0.363998	0.167	0.704	1	TOP1	0.0236101	0.430521	0.636	0.463	1	PARK7	0.0042775	0.254789	1	0.976	1
						HMGB1	2.75e-05	0.340138	1	1	0.510092	AKT1S1	0.0598496	0.268303	0.667	0.345	1	PTPRG	0.0236634	0.365357	0.455	0.206	1	PRPF38B	0.00430669	0.288473	0.786	0.459	1
						NDUFB3	2.76e-05	0.266618	0.807	0.663	0.510493	REEP2	0.060201	-0.325608	0	0.395	1	KAZN	0.0236882	0.26854	0.455	0.176	1	NDUFA13	0.00433234	0.411247	1	0.812	1
						MPST	2.85e-05	-0.305565	0.807	0.861	0.52707	YWHAB	0.0603799	0.30772	1	0.583	1	CYTL1	0.0237295	-0.414678	0.091	0.434	1	H2AFY	0.00444409	0.317259	0.857	0.565	1
						TRA2B	2.87e-05	0.26882	0.737	0.476	0.530954	WBP5	0.0605606	0.49086	1	0.937	1	BICC1	0.0239005	0.359957	0.545	0.279	1	PFDN2	0.00454117	0.369854	1	0.894	1
						HNRNPF	2.91e-05	0.253685	0.807	0.562	0.539414	PPFIBP1	0.0605669	0.25836	0.667	0.363	1	VCP	0.0239528	0.283129	0.909	0.61	1	CBX1	0.0047384	0.356523	0.857	0.624	1
						GUK1	2.97e-05	0.261133	1	0.947	0.550712	ARMCX1	0.0606087	-0.400796	0.333	0.65	1	NDUFS6	0.0239944	0.26621	1	0.904	1	GTF2A2	0.00474664	0.360654	0.929	0.682	1
						CRYAB	3.19e-05	-0.822548	0.754	0.784	0.591136	PUS3	0.0606248	0.263719	0.333	0.108	1	UFM1	0.0241709	0.27702	0.818	0.654	1	SFPQ	0.00476298	0.306506	0.786	0.459	1
						C9orf16	3.24e-05	-0.257924	0.842	0.913	0.599624	DDX5	0.0607607	0.265474	1	0.821	1	POLR3K	0.0243559	0.290326	0.636	0.397	1	ZNF428	0.00477771	0.355987	1	0.824	1
						HNRNPH1	3.3e-05	0.300861	0.772	0.476	0.610568	CEP63	0.0612104	0.370524	0.5	0.206	1	VDAC3	0.024397	0.287458	0.909	0.882	1	MRPL18	0.00481473	0.281987	0.929	0.612	1
						TSPAN3	3.35e-05	0.279467	0.912	0.726	0.620252	FNBP4	0.0614592	0.296806	0.833	0.39	1	SIRT2	0.0248163	0.347732	0.727	0.463	1	GNB1	0.0048537	0.2556	0.714	0.329	1
						TUBB4B	3.48e-05	0.361882	0.579	0.298	0.645183	FHL2	0.0618139	0.419341	0.333	0.112	1	UBE2V2	0.0249444	0.272398	0.909	0.772	1	NFIB	0.00486622	0.305589	0.929	0.541	1
						PEA15	3.53e-05	-0.342174	0.579	0.697	0.654464	ACTR3	0.0619155	0.253605	0.667	0.332	1	ID1	0.0249634	0.555665	0.727	0.581	1	FDFT1	0.00492453	0.492081	0.857	0.447	1
						CD59	3.65e-05	0.296303	0.789	0.553	0.676897	SRRM2	0.0622401	0.315062	0.833	0.709	1	PLP2	0.0253464	-0.411871	0.727	0.897	1	VDAC1	0.0049297	0.392342	1	0.824	1
						PSMD11	3.7e-05	0.268055	0.614	0.37	0.685597	RSL24D1	0.0623127	0.309701	1	0.955	1	RBP1	0.0253819	0.41674	1	0.89	1	FITM1	0.00494401	0.308128	0.857	0.471	1
						ZFHX4	3.75e-05	0.262633	0.702	0.481	0.693757	SNX3	0.0623198	-0.270954	1	0.969	1	DDX18	0.0254021	0.264558	0.909	0.61	1	NME1	0.00498803	0.337615	0.857	0.541	1
						SRRM2	3.9e-05	0.268036	0.877	0.803	0.721918	TMEM80	0.0623198	-0.291732	0	0.39	1	GOLGA4	0.0254562	0.315329	0.909	0.596	1	PAK2	0.00498803	0.272731	0.929	0.529	1
						MRPL52	4.34e-05	0.250124	0.877	0.615	0.804597	FNDC3A	0.0623198	-0.360477	0	0.39	1	DDX46	0.0256636	0.35533	0.909	0.838	1	ANXA6	0.00505104	0.385316	1	0.8	1
						SH3BGRL3	4.4e-05	-0.308465	1	1	0.814199	PDIA4	0.0632901	0.394729	0.833	0.457	1	SCO1	0.0257408	0.295271	0.545	0.265	1	SMC6	0.00506962	-0.44713	0.714	0.859	1
						MDK	4.47e-05	0.296	1	0.947	0.827475	NDUFS1	0.0636592	0.274216	0.5	0.206	1	PIF1	0.0258604	-0.441161	0	0.331	1	ITGB1BP1	0.00511985	0.300513	0.857	0.4	1
						MRPL23	4.56e-05	0.261327	0.772	0.505	0.845066	SNAI2	0.064499	-0.34505	0	0.386	1	CENPU	0.0258676	0.328747	0.909	0.794	1	TCEB1	0.00513936	0.302006	1	0.765	1
						TUBA4A	4.62e-05	0.271446	0.509	0.245	0.855458	BRD2	0.0644991	-0.306154	0	0.386	1	HDAC2	0.0263469	0.258617	1	0.882	1	C16orf87	0.00516303	0.334005	0.786	0.518	1
						AP1S2	4.62e-05	0.254083	0.825	0.543	0.856268	WDR54	0.0646904	-0.334462	0.167	0.52	1	MPPED2	0.0264179	-0.41418	0.455	0.75	1	SMC1A	0.00517125	0.285189	0.571	0.2	1
						HNRNPU	4.72e-05	0.250618	0.912	0.774	0.875148	TRAPPC6A	0.064998	0.252585	0.667	0.404	1	HJURP	0.0265181	-0.331891	0.091	0.441	1	CD99	0.00528543	0.318764	1	0.859	1
						TAX1BP1	4.83e-05	0.268547	0.86	0.678	0.894749	CALD1	0.06591	-0.34994	1	0.969	1	ATP6V1G1	0.0268671	0.251197	1	0.89	1	TOMM22	0.00528543	0.284251	1	0.859	1
						DYNLL1	4.98e-05	0.256062	1	0.952	0.922752	NFIA	0.0666001	0.284752	0.833	0.511	1	SIVA1	0.0269358	0.291529	1	0.941	1	COX20	0.00545634	0.362189	0.714	0.494	1
						C11orf31	5.02e-05	0.253973	0.947	0.885	0.930159	PLAG1	0.0666275	0.271836	0.333	0.112	1	CDCA3	0.0269914	-0.464078	0.273	0.574	1	MT-ND4	0.00549319	0.301947	1	0.988	1
						GALK1	5.15e-05	0.261767	0.684	0.399	0.95429	CAND1	0.0667385	0.34306	0.667	0.39	1	EPB41L2	0.0270418	-0.316941	0.455	0.757	1	RNASEH2C	0.0055988	0.256695	0.857	0.506	1
						IGFBP5	5.16e-05	-0.915251	0.982	0.918	0.955898	EIF1AY	0.0667401	-0.298809	0	0.381	1	TMED9	0.0274429	-0.375753	0.818	0.949	1	SRRM1	0.00561027	0.376759	1	0.753	1
						PRDX4	5.39e-05	-0.261668	0.649	0.803	0.997878	PLPP5	0.0667401	-0.316221	0	0.381	1	CCT5	0.0274544	0.327483	0.909	0.699	1	RNPS1	0.00561027	0.265266	1	0.753	1
						ATXN7L3B	5.49e-05	0.268041	0.737	0.51	1	PITX3	0.0675037	0.26524	0.333	0.103	1	SFPQ	0.0275355	0.297438	0.818	0.596	1	MICU2	0.00562949	0.301744	0.929	0.588	1
						AP2M1	5.83e-05	-0.262942	0.947	0.952	1	PTMS	0.0677694	-0.360112	1	0.973	1	GSTA4	0.027581	0.265451	0.909	0.691	1	UACA	0.00569304	0.386941	0.786	0.447	1
						CYBA	5.91e-05	-0.271742	0.175	0.442	1	LYRM2	0.0684153	0.311339	0.667	0.377	1	RXRG	0.0276963	-0.303954	0.091	0.412	1	PCBP1	0.00573915	0.388401	1	0.812	1
						MED4	5.97e-05	0.266866	0.772	0.486	1	CTNNB1	0.0686036	0.539966	0.667	0.413	1	DDX21	0.0277104	0.425797	0.545	0.338	1	PMF1	0.00575266	0.254159	0.857	0.518	1
						SERPINH1	6.36e-05	-0.327236	0.947	0.976	1	NUP85	0.0693405	0.304672	0.333	0.117	1	SERPINH1	0.0279729	-0.384151	0.909	0.956	1	SVIL	0.00578421	0.331563	0.929	0.8	1
						YWHAQ	6.46e-05	0.273601	0.982	0.827	1	RB1CC1	0.0694194	0.3333	0.667	0.341	1	PLOD1	0.0280625	-0.30642	0.273	0.551	1	REEP2	0.0057945	-0.280596	0	0.388	1
						RXRG	7.35e-05	-0.315639	0.158	0.423	1	C4orf3	0.0695933	-0.397647	0.833	0.919	1	HSD17B10	0.0281106	0.264021	0.909	0.691	1	C12orf75	0.0057945	-0.339333	0	0.388	1
						EIF2S2	7.86e-05	0.315152	0.947	0.827	1	MVB12A	0.0706906	-0.306283	0.167	0.507	1	ARHGAP11B	0.0282946	-0.301738	0.091	0.412	1	EML4	0.00580906	0.313517	0.786	0.459	1
						P4HB	8.18e-05	-0.305966	0.86	0.918	1	VPS72	0.0714129	-0.273837	0	0.372	1	COA6	0.0284519	0.26758	0.727	0.412	1	MARCKSL1	0.00583686	0.433892	1	0.929	1
						RBM8A	8.5e-05	0.260819	0.93	0.793	1	ENDOV	0.0714129	-0.281941	0	0.372	1	ARL6IP5	0.0287418	-0.33153	0.636	0.86	1	NDUFA6	0.00589232	0.422666	1	0.729	1
						TUBB	9.08e-05	0.32811	1	0.99	1	EPN1	0.0714129	-0.295839	0	0.372	1	NDUFB11	0.0293154	-0.263204	0.909	0.963	1	BSG	0.00589755	0.340568	1	0.8	1
						GAS1	9.58e-05	-0.262331	0.298	0.534	1	DSTN	0.0715778	0.425136	1	0.933	1	RRM2	0.0295616	0.288197	0.909	0.669	1	CEP350	0.00590151	0.267249	0.643	0.282	1
						HIGD1A	0.000102829	0.28045	0.632	0.361	1	COPS8	0.0726306	-0.322727	0.167	0.61	1	DNPH1	0.0298756	-0.265723	0.636	0.868	1	HNRNPM	0.00600375	0.663167	0.857	0.635	1
						S100A10	0.000104933	-0.418104	0.982	0.981	1	ITM2A	0.0728952	-0.58719	0.5	0.897	1	ENAH	0.0298805	0.391856	0.909	0.713	1	SESN3	0.00611238	0.357806	0.786	0.471	1
						DTWD1	0.000119045	-0.291682	0.579	0.697	1	MDFI	0.073047	0.292909	1	0.839	1	TULP3	0.0299831	-0.253383	0.273	0.566	1	DNAJC15	0.00611707	-0.314967	0.071	0.506	1
						PKIG	0.000124656	0.294471	0.702	0.495	1	MRLN	0.0730596	0.396021	0.667	0.372	1	POLR2L	0.0300241	0.338319	1	0.875	1	BGN	0.00612063	-0.509853	0.571	0.765	1
						DSTN	0.000129544	0.258249	1	0.947	1	PITX2	0.0735976	-0.437396	0.833	0.964	1	VDAC1	0.0301064	0.337656	1	0.912	1	PSMD7	0.00613279	0.32339	0.929	0.506	1
						EIF2AK4	0.000136013	0.261688	0.807	0.567	1	TXNIP	0.0736047	-0.486937	0.833	0.982	1	TUBA4A	0.0302317	0.260405	0.636	0.316	1	MRPL14	0.00617301	0.311595	0.929	0.718	1
						LPAR4	0.000137326	-0.261679	0.368	0.644	1	NDUFS7	0.0736199	0.293481	0.833	0.682	1	BNIP3	0.030506	-0.312908	0.818	0.868	1	TMEM256	0.00619765	0.376682	1	0.906	1
						SMC6	0.00014049	-0.338451	0.772	0.832	1	RAC3	0.0737816	-0.393221	0.333	0.614	1	SET	0.030715	0.322027	1	0.978	1	ACSL4	0.00638051	0.253222	0.5	0.188	1
						MAP1B	0.000144973	0.367514	0.86	0.683	1	MRPS11	0.0738473	-0.304075	0	0.368	1	SNHG19	0.0307862	0.26846	0.545	0.309	1	RGMB	0.0065354	-0.394788	0.286	0.612	1
						NCL	0.000148807	0.264498	1	0.99	1	DAP	0.0739101	0.314654	0.5	0.251	1	COL6A3	0.03174	-0.335477	0.818	0.89	1	PREPL	0.00654054	0.278113	0.714	0.4	1
						2020-09-02	0.000173916	-0.259078	0.807	0.865	1	HSPA5	0.0747383	-0.473758	0.667	0.821	1	CDC20	0.0317754	-0.791312	0.182	0.493	1	AP3D1	0.00672494	0.29409	0.571	0.259	1
						SCAF11	0.00017911	0.250368	0.877	0.668	1	PCBP1	0.0753812	-0.390507	0.333	0.677	1	EIF2S2	0.031813	0.29541	0.909	0.912	1	ACADM	0.00697243	0.275414	0.643	0.318	1
						UBE2C	0.000179511	0.399268	0.281	0.091	1	DCTD	0.0760519	-0.302585	0.167	0.511	1	HIST1H1B	0.0320455	-0.349314	0.182	0.522	1	NCOA1	0.00699114	0.359957	0.786	0.6	1
						MOB4	0.000198995	0.275965	0.737	0.495	1	MORN2	0.0763489	-0.279333	0	0.363	1	KNOP1	0.0321947	0.259428	0.818	0.507	1	LSM7	0.00699129	0.361942	0.929	0.906	1
						HNRNPR	0.000225278	0.297477	0.912	0.769	1	HOOK2	0.0763489	-0.290881	0	0.363	1	TLK1	0.0326116	0.25239	0.636	0.36	1	HNRNPL	0.00707376	0.271182	0.643	0.282	1
						CKB	0.000227673	0.292294	0.895	0.649	1	PDGFC	0.0763489	-0.291125	0	0.363	1	PPP1R14B	0.0326308	0.402843	0.818	0.728	1	HDAC2	0.00719183	0.32465	1	0.706	1
						ALDOA	0.000235105	-0.258804	1	1	1	CALM2	0.0772753	0.310378	1	0.852	1	UBC	0.0330179	-0.516277	1	0.912	1	TADA3	0.00722528	0.273394	0.929	0.588	1
						RAB13	0.000246857	-0.253805	0.912	0.962	1	GPX1	0.0775264	0.270088	1	0.888	1	LAMTOR1	0.0332081	0.261374	0.909	0.875	1	RHEB	0.00726973	0.273406	1	0.788	1
						RNASEH2C	0.000253818	0.289437	0.632	0.438	1	UTP11L	0.0778607	0.295337	0.667	0.408	1	NPW	0.0333037	-0.348825	0.091	0.404	1	NOC2L	0.00731573	0.308351	0.714	0.341	1
						POLR2J3	0.000260531	0.251071	0.719	0.5	1	SARAF	0.0785032	-0.365282	0.667	0.883	1	CELF2	0.0333233	0.354687	0.636	0.463	1	TOP1	0.00737669	0.469859	0.714	0.424	1
						MZT1	0.000266144	0.253482	0.561	0.298	1	TLN1	0.0789193	-0.255713	0	0.359	1	UBE2C	0.0334851	-0.927929	0.818	0.875	1	FKBP4	0.00755382	0.339369	0.786	0.424	1
						CHN1	0.00026904	-0.251906	0.228	0.466	1	UGP2	0.0789193	-0.273523	0	0.359	1	PA2G4	0.0341119	0.264958	0.909	0.816	1	WBP2	0.00756951	0.272997	0.643	0.329	1
						ATRX	0.000269683	0.252369	0.93	0.832	1	RTN4	0.0791488	0.256403	1	0.767	1	PDGFA	0.0348138	0.29134	0.364	0.147	1	LSM5	0.00779781	0.357468	0.929	0.835	1
						PALMD	0.000285921	0.268654	0.737	0.558	1	NDUFB1	0.0792858	0.407182	0.833	0.628	1	DAD1	0.0358848	-0.306053	0.909	0.963	1	ZC3H15	0.00787325	0.325323	1	0.706	1
						SGCE	0.000296916	0.267608	0.719	0.457	1	MLEC	0.0795526	-0.320007	0.167	0.641	1	YME1L1	0.0360517	0.254095	0.727	0.456	1	FTH1	0.00790525	0.277303	1	1	1
						JUN	0.000304774	-0.572674	0.316	0.519	1	SRP9	0.0808086	-0.368162	0.833	0.91	1	IGFBP5	0.0362024	-0.826455	1	0.941	1	COPS8	0.00804861	0.316348	0.857	0.624	1
						LRRC17	0.00030868	0.28707	0.842	0.611	1	SEC61B	0.0809162	-0.421704	0.667	0.969	1	CYBA	0.0367547	-0.319361	0.273	0.529	1	FDPS	0.00820572	0.474915	0.786	0.541	1
						JSRP1	0.000335201	-0.280384	0.596	0.736	1	TMEM14B	0.0814613	0.344761	1	0.556	1	BLVRB	0.0371691	-0.283646	0.455	0.728	1	ANP32A	0.0083096	0.389288	1	0.659	1
						ANXA2	0.000336674	-0.333074	0.982	0.986	1	SMIM19	0.0815597	-0.263059	0	0.354	1	RABAC1	0.037196	-0.33584	0.909	0.949	1	DYNC1I2	0.0083591	0.383497	0.929	0.718	1
						H2AFV	0.000373376	0.252219	0.93	0.731	1	MIER1	0.0815597	-0.26611	0	0.354	1	PRSS23	0.0372052	-0.329496	0.455	0.64	1	PGM1	0.0083941	0.365686	0.857	0.518	1
						COL1A1	0.000431614	-0.298134	1	1	1	COQ5	0.0815597	-0.269292	0	0.354	1	SLF2	0.0372178	0.290832	0.727	0.449	1	RBM24	0.00842421	-0.514116	0.357	0.694	1
						ARL4A	0.00045106	-0.384975	0.491	0.63	1	VAMP3	0.0815597	-0.279396	0	0.354	1	TMA16	0.0373005	0.265601	0.818	0.596	1	REST	0.00852658	0.256718	0.857	0.435	1
						CALD1	0.000521908	-0.302236	0.947	0.99	1	TYW3	0.0815597	-0.286488	0	0.354	1	CAPZB	0.0375638	0.275808	1	0.794	1	SSRP1	0.00859821	0.29221	0.714	0.412	1
						ARPC2	0.000632663	0.254302	0.947	0.889	1	SLC40A1	0.0815597	-0.304872	0	0.354	1	G3BP1	0.0377578	0.33393	0.727	0.632	1	PSMB7	0.00863317	0.300691	1	0.929	1
						PABPC4	0.000687578	-0.262903	0.702	0.784	1	ATXN2	0.0817528	0.384503	0.5	0.22	1	DNAJC8	0.0378196	0.292233	0.909	0.765	1	HSPB1	0.00864039	0.348274	1	1	1
						MLLT3	0.000949048	-0.296777	0.649	0.726	1	ASPH	0.0842718	-0.252273	0	0.35	1	TTK	0.0379163	-0.33399	0.091	0.412	1	COL6A3	0.008679	-0.313173	0.071	0.424	1
						VCP	0.000978262	0.265451	0.807	0.688	1	STAMBP	0.0842718	-0.272441	0	0.35	1	2020-09-11	0.0381984	0.379326	1	0.926	1	KREMEN2	0.00872146	0.405982	0.571	0.235	1
						BEX4	0.00100051	0.270685	0.877	0.707	1	FAM172A	0.0842718	-0.288576	0	0.35	1	CAPG	0.0383307	-0.284205	0.091	0.434	1	PRNP	0.00887607	0.257882	0.857	0.565	1
						PCOLCE	0.00135718	-0.327523	0.579	0.707	1	DAZAP2	0.0842718	-0.302242	0	0.35	1	EXOSC9	0.0385136	0.297956	0.727	0.426	1	C14orf119	0.0089401	0.252996	0.786	0.447	1
						CITED2	0.00165433	-0.261401	0.351	0.534	1	ACTG2	0.0842718	-0.317527	0	0.35	1	OLFM2	0.0388471	0.332214	0.727	0.434	1	ARMCX2	0.00894799	0.333556	0.929	0.6	1
						RPS27L	0.00170687	0.324744	0.982	0.928	1	CKAP4	0.0844626	0.324298	0.667	0.363	1	EMP3	0.0389163	-0.308815	0.909	0.971	1	PABPC4	0.00899514	-0.375351	0.571	0.8	1
						PTGDS	0.00215348	0.352067	0.807	0.683	1	CHD9	0.0854099	0.27528	1	0.686	1	LLPH	0.0391095	0.329933	0.636	0.39	1	NDUFB3	0.009313	0.276982	1	0.824	1
						CACYBP	0.00226601	0.252902	0.807	0.611	1	TCF4	0.0855032	0.316873	1	0.664	1	VAMP5	0.0398524	0.271133	0.727	0.522	1	ATPIF1	0.00935597	0.302804	1	0.847	1
						IGFBP3	0.00257933	-0.338103	0.632	0.707	1	HSPE1	0.0858959	0.369736	1	0.839	1	SEC63	0.0401041	0.255953	0.909	0.713	1	NDUFS8	0.0093997	0.282359	1	0.882	1
						RHOB	0.00261945	-0.280991	0.404	0.572	1	DICER1	0.0861423	0.250979	0.5	0.229	1	KIAA0368	0.0402758	0.272412	0.455	0.206	1	PYURF	0.00945838	0.259475	0.929	0.753	1
						RAD23B	0.00273702	0.260765	0.667	0.5	1	CCDC25	0.0866534	0.28405	0.667	0.39	1	FKBP11	0.040467	-0.260753	0.091	0.419	1	SNF8	0.00946455	0.323456	0.929	0.635	1
						IER2	0.00298192	-0.544103	0.561	0.668	1	NNAT	0.0868463	0.396148	1	0.762	1	PRDX4	0.0405618	-0.29232	0.818	0.831	1	ST6GALNAC5	0.00951928	0.279453	0.786	0.447	1
						COL6A1	0.00313843	-0.260263	0.789	0.793	1	SAFB	0.086908	0.328658	0.5	0.265	1	PAX7	0.0408593	0.273669	0.545	0.324	1	MZT2B	0.00970754	-0.383784	1	0.929	1
						GADD45G	0.00324545	-0.281237	0.123	0.322	1	SMCO4	0.0870569	-0.267031	0	0.345	1	EIF1	0.0410578	-0.259466	1	1	1	NEAT1	0.00977169	-0.599015	0.357	0.671	1
						TUBA1A	0.00355308	0.309483	0.982	0.957	1	ANKRD11	0.0870569	-0.268281	0	0.345	1	RHOC	0.0414074	-0.304526	0.909	0.949	1	CMSS1	0.0100479	0.275791	0.643	0.306	1
						TIMP1	0.0047138	-0.312204	0.895	0.942	1	SYNGR1	0.087057	-0.255521	0	0.345	1	DLGAP5	0.041622	-0.552364	0.364	0.574	1	SH3GLB1	0.0102169	0.306283	0.929	0.8	1
						JUNB	0.00516982	-0.37208	0.544	0.625	1	RFXANK	0.087057	-0.266468	0	0.345	1	TMEM167A	0.0417811	-0.264747	0.636	0.728	1	RNF217	0.010222	0.254925	0.714	0.341	1
						NEFM	0.00583311	-0.420489	0.614	0.707	1	FEZ1	0.087057	-0.294091	0	0.345	1	AKR1C1	0.0417824	0.257442	0.636	0.36	1	CFDP1	0.0102777	0.351604	0.929	0.718	1
						ODC1	0.00736649	0.270809	0.825	0.683	1	WDR13	0.0877346	-0.345377	0.167	0.484	1	PDIA4	0.0423405	0.317688	0.909	0.816	1	DSTN	0.0102955	0.371916	1	0.965	1
						NUPR1	0.0106228	-0.298807	0.702	0.827	1	MT-ND6	0.0877358	0.263204	0.667	0.35	1	RARRES2	0.0425505	-0.265924	0	0.287	1	NDUFV1	0.0103658	-0.325518	0.429	0.706	1
						MYLPF	0.0195763	-0.535503	0.544	0.606	1	BRI3	0.0886443	0.296567	0.667	0.448	1	ZC3H15	0.0426222	0.317551	0.909	0.728	1	SCAND1	0.0104028	0.256632	1	0.8	1
						KIAA0101	0.0272844	0.259221	0.526	0.351	1	FOXJ3	0.0887165	0.257494	0.333	0.121	1	EDIL3	0.0432907	-0.294384	0.091	0.397	1	ZCRB1	0.0105834	0.27421	1	0.765	1
						SMPX	0.0278419	0.26731	0.351	0.231	1	STMN1	0.0887902	0.322318	0.833	0.843	1	SUPT16H	0.0441807	0.267808	0.909	0.809	1	TCF12	0.0108085	0.330692	0.857	0.647	1
						FOS	0.0292915	-0.299366	0.456	0.615	1	MZT2B	0.0887956	-0.386771	0.833	0.946	1	HACD3	0.0442189	0.307628	0.818	0.662	1	DBI	0.0108188	0.536773	1	0.847	1
						KRT17	0.0493512	-0.261025	0.053	0.149	1	MFF	0.0889524	-0.346776	0.333	0.578	1	TAX1BP1	0.0446214	0.287145	0.909	0.779	1	PSMA4	0.0108188	0.288301	1	0.847	1
						NEFL	0.058115	-0.258631	0.123	0.216	1	PAPSS1	0.0896998	-0.380368	0.333	0.695	1	DDX6	0.0454902	0.310689	0.636	0.537	1	SQLE	0.0108786	0.262565	0.571	0.271	1
						DDIT4	0.0670658	-0.254501	0.877	0.856	1	NPW	0.0899167	-0.350177	0	0.341	1	SNRPB	0.0456305	0.257837	1	0.971	1	AHI1	0.0108807	0.273309	0.714	0.435	1
						IFI6	0.0697404	-0.282515	0.333	0.433	1	HADH	0.0899168	-0.276238	0	0.341	1	ZFR	0.0457225	0.255449	0.909	0.566	1	EIF2S3	0.0111958	-0.371985	0.857	0.918	1
						BTG2	0.0772802	-0.254996	0.368	0.471	1	AHI1	0.0899168	-0.278541	0	0.341	1	AURKA	0.0462703	-0.498336	0.273	0.493	1	CKB	0.0112249	0.382631	1	0.965	1
						TUBA1B	0.114099	0.398659	0.982	0.986	1	PSMC3	0.0902705	-0.297975	0.167	0.484	1	EVL	0.0462866	0.267252	0.545	0.294	1	YWHAE	0.0112259	0.331969	1	0.988	1
						HMGB2	0.307259	0.281184	0.561	0.486	1	FBXO25	0.0907605	0.264662	0.333	0.121	1	IER2	0.0463021	-0.748213	0.818	0.743	1	RAB11A	0.0113662	0.261193	1	0.682	1
						PTN	0.361151	-0.345195	0.93	0.841	1	EI24	0.090776	-0.352345	0.333	0.614	1	HELLS	0.0465559	0.314296	0.909	0.566	1	DDX3Y	0.0114394	-0.26406	0	0.341	1
						FABP7	0.602006	-0.277803	0.175	0.192	1	UHMK1	0.0911757	0.266973	0.333	0.112	1	CRABP2	0.0467077	-0.364169	0.727	0.838	1	CFAP20	0.0114525	0.298786	0.857	0.506	1
												SH3GLB2	0.0911757	0.262036	0.333	0.112	1	TSPAN12	0.0472164	0.311975	0.727	0.485	1	ARL6IP1	0.0114856	0.312673	1	0.753	1
												TBRG4	0.0911757	0.254529	0.333	0.112	1	ARF1	0.0472383	-0.273822	0.818	0.963	1	CACYBP	0.0115186	0.258993	0.857	0.494	1
												PDPN	0.0914181	0.257223	0.167	0.036	1	SRD5A3	0.0476168	0.269572	0.455	0.272	1	IK	0.0115204	0.362721	0.857	0.541	1
												ILK	0.0914687	-0.305984	0.167	0.475	1	S100A13	0.0477519	-0.319292	0.727	0.868	1	CAPZB	0.011589	0.318591	1	0.776	1
												C11orf1	0.0919667	0.286987	0.5	0.274	1	IGFBP3	0.0477574	-0.379997	0.364	0.735	1	PFDN6	0.0116111	0.281099	0.857	0.471	1
												PTK7	0.092778	-0.302905	0.167	0.475	1	PLAGL1	0.0478295	0.441242	0.818	0.574	1	TET1	0.0116249	0.261705	0.643	0.318	1
												FKBP4	0.0928528	-0.296116	0	0.336	1	MAGEF1	0.0484838	0.25042	0.818	0.728	1	LSM4	0.0120344	0.350498	0.929	0.918	1
												HACD3	0.092853	-0.260391	0	0.336	1	KLF6	0.0486444	-0.386486	0.636	0.75	1	MEAF6	0.0121745	0.256192	0.857	0.576	1
												TRPT1	0.092853	-0.279514	0	0.336	1	SMARCA5	0.048822	0.334563	0.909	0.684	1	ECHS1	0.0121758	0.356376	0.857	0.682	1
												COL5A1	0.092853	-0.308707	0	0.336	1	EIF4A1	0.0488464	0.326914	0.909	0.831	1	ATP6V0B	0.0121932	0.289879	0.857	0.624	1
												RAB5C	0.0929637	-0.334932	0.167	0.561	1	DNM1L	0.04931	0.282082	0.545	0.294	1	G3BP1	0.0122417	0.270846	0.643	0.365	1
												MTCH1	0.0935004	-0.384351	0.333	0.812	1	UBXN2A	0.0498316	0.308401	0.818	0.522	1	KIF5B	0.0122746	0.313256	0.929	0.753	1
												HIST3H2A	0.0939524	-0.395991	0.333	0.623	1	PEA15	0.050329	-0.282241	0.455	0.728	1	CLTA	0.0124026	0.307729	1	0.965	1
												TOMM22	0.0942432	0.369042	1	0.771	1	TNNT1	0.0515015	0.413624	1	0.963	1	SSR3	0.012548	-0.320307	0.929	0.906	1
												PSMA5	0.0948259	-0.32393	0.167	0.543	1	GCSH	0.0527416	0.271925	0.909	0.904	1	AKR1B1	0.0125722	0.328221	1	0.765	1
												CACUL1	0.0958669	-0.252422	0	0.332	1	THY1	0.0527671	-0.386871	0.545	0.728	1	GUK1	0.0125806	0.341731	1	0.976	1
												SHPRH	0.0958669	-0.306215	0	0.332	1	NUF2	0.0537209	-0.377535	0.273	0.61	1	CTNNBIP1	0.0127393	0.428801	0.786	0.6	1
												POLR2L	0.096312	0.385958	0.833	0.655	1	IKBIP	0.0542786	-0.322278	0.636	0.765	1	PDRG1	0.0127568	0.30419	0.643	0.424	1
												PRAF2	0.0964758	-0.317012	0.167	0.529	1	IGFBP7	0.0545883	-0.543167	0.182	0.441	1	GABPB1	0.0128905	0.27492	0.786	0.424	1
												UBE2W	0.0971965	0.282197	0.5	0.233	1	SFRP1	0.0547165	0.271974	0.545	0.294	1	EID1	0.0129414	0.269833	1	1	1
												MRPS21	0.0983252	0.326408	1	0.879	1	ITGAE	0.0552886	-0.289704	0.455	0.743	1	TTC1	0.013035	0.255147	0.643	0.353	1
												UBE2E1	0.0989604	-0.263752	0	0.327	1	SON	0.0553178	0.493642	0.818	0.816	1	KHDRBS1	0.0132209	0.252197	1	0.694	1
												NDUFA11	0.0995005	0.271987	1	0.865	1	RBM24	0.0557199	0.251348	0.273	0.096	1	ACTR10	0.013286	0.332374	0.857	0.506	1
												ARHGDIA	0.0995513	-0.325909	0.167	0.475	1	MYL12A	0.0560583	-0.333793	1	0.941	1	DDX24	0.013315	0.342179	1	0.706	1
												NOP10	0.102108	0.386464	0.833	0.785	1	HOXA7	0.056197	0.290907	0.364	0.162	1	STRA13	0.0133432	0.253645	0.786	0.447	1
												BLOC1S2	0.102135	-0.271409	0	0.323	1	TPX2	0.0567802	-0.518654	0.455	0.699	1	PRPF40A	0.0133835	0.325604	0.929	0.647	1
												C4orf27	0.102135	-0.279133	0	0.323	1	MELK	0.0569052	-0.253208	0.273	0.559	1	RBM17	0.0134629	0.262277	0.857	0.635	1
												ALDH1A1	0.102135	-0.38854	0	0.323	1	NMT2	0.0576814	0.268365	0.545	0.331	1	RABAC1	0.0136738	-0.282539	1	0.918	1
												TSPO	0.103703	-0.305321	0.667	0.924	1	UBXN1	0.0579597	-0.263697	0.818	0.941	1	TSEN34	0.0136972	0.290035	0.929	0.718	1
												TOMM7	0.103802	0.255839	1	0.991	1	ALDH1A1	0.0585956	-0.5556	0.091	0.353	1	PSMB3	0.0138369	0.282147	1	0.8	1
												IGF2BP1	0.104718	0.285012	0.333	0.13	1	CYR61	0.0593843	-0.704444	0.636	0.735	1	CHD4	0.0138996	0.280234	0.929	0.588	1
												SMARCA5	0.105081	0.31722	0.667	0.448	1	CHN1	0.0610884	-0.255948	0.182	0.426	1	GOLGA4	0.0141001	0.367506	0.857	0.6	1
												IMMP1L	0.105393	-0.251526	0	0.318	1	XRCC2	0.061097	0.275073	0.636	0.397	1	TMEM205	0.0142809	0.332905	0.929	0.612	1
												GPATCH2L	0.105393	-0.25313	0	0.318	1	TOMM5	0.0618101	0.391853	0.636	0.434	1	MAGEH1	0.014382	0.357932	0.714	0.459	1
												RP11-499F3.2	0.105393	-0.255241	0	0.318	1	JUNB	0.0622816	-0.394874	0.455	0.684	1	PPP1CA	0.0143992	0.266638	0.857	0.518	1
												PDE11A	0.105393	-0.263731	0	0.318	1	PTGDS	0.0627892	0.542421	0.727	0.581	1	GLRX5	0.0143992	0.26389	0.857	0.518	1
												CCND1	0.105393	-0.270791	0	0.318	1	RNF5	0.0630835	-0.253261	0.455	0.735	1	CWC15	0.0145738	0.260034	0.929	0.647	1
												DCAF7	0.105393	-0.277237	0	0.318	1	GAS2L3	0.0633501	-0.257773	0.091	0.375	1	UQCC2	0.0146749	0.314657	1	0.812	1
												VAMP2	0.105959	-0.355095	0.833	0.857	1	SMARCB1	0.0644172	0.26727	0.818	0.654	1	SSB	0.0147119	0.328907	0.929	0.835	1
												SLC35A4	0.106984	0.284035	0.333	0.13	1	ZNRD1	0.0650917	-0.257856	0.364	0.588	1	NDUFC2	0.0147119	0.309378	1	0.824	1
												LARP1	0.107121	0.259661	0.5	0.211	1	CCNB2	0.0661199	-0.620209	0.364	0.559	1	PRPF4B	0.014805	0.27717	0.714	0.447	1
												CALM3	0.107481	-0.27296	0.5	0.794	1	PLAC9	0.0661924	-0.395723	0.364	0.596	1	ZNF207	0.0154184	0.296615	0.857	0.659	1
												OXA1L	0.10756	-0.322398	0.333	0.691	1	PSRC1	0.0663807	-0.435365	0.273	0.5	1	YWHAH	0.0154561	0.260041	0.857	0.376	1
												PRDM2	0.107894	0.274672	0.667	0.417	1	G2E3	0.0672178	-0.265653	0.182	0.485	1	RDX	0.0154722	0.365956	0.929	0.635	1
												DCTN6	0.108158	-0.279469	0.167	0.471	1	C12orf75	0.068073	-0.258294	0.364	0.632	1	CHMP5	0.0156395	0.306901	1	0.859	1
												EIF4A1	0.108394	-0.361498	0.667	0.771	1	LMNA	0.0682956	-0.389499	0.909	0.897	1	SSR1	0.0157101	0.260192	0.786	0.459	1
												SMARCB1	0.108506	0.275747	0.667	0.435	1	SLC3A2	0.0706261	-0.252034	0.364	0.618	1	RGS2	0.0157987	-0.693924	0.429	0.671	1
												LINC00662	0.108735	-0.254696	0	0.314	1	KDELR3	0.0720738	-0.282015	0.364	0.566	1	RHOBTB3	0.0161164	0.262207	1	0.882	1
												MLX	0.108735	-0.251935	0	0.314	1	SNRPA	0.0726083	0.314469	0.727	0.713	1	PARP1	0.0162005	0.295727	1	0.706	1
												LAMA2	0.108735	-0.259179	0	0.314	1	NEK2	0.073645	-0.363445	0.091	0.346	1	EMC4	0.0164329	0.284426	0.929	0.553	1
												PFN2	0.109217	-0.279336	1	0.982	1	RANBP1	0.0742163	0.298074	1	0.993	1	CCT2	0.0164679	0.276807	1	0.835	1
												SELM	0.109289	-0.354912	0.333	0.726	1	BUB3	0.0749703	-0.370753	0.727	0.779	1	MLLT11	0.0165245	0.319375	1	0.859	1
												PPP2R3A	0.109289	0.284954	0.333	0.13	1	QARS	0.0751033	0.276598	0.909	0.868	1	DDX5	0.017426	0.32387	0.929	0.859	1
												SNRPD1	0.110073	-0.334156	0.667	0.861	1	NAA50	0.0758337	0.285028	0.636	0.412	1	DES	0.0175334	0.299325	1	0.918	1
												JTB	0.110141	0.28459	1	0.776	1	DCTN3	0.0759934	-0.296522	0.727	0.801	1	BRI3	0.0176068	0.375086	0.857	0.518	1
												TAF12	0.110189	-0.302172	0.167	0.596	1	EGR1	0.0763308	-0.36201	0.455	0.721	1	PLD3	0.0176321	0.614673	0.929	0.788	1
												SRSF3	0.110457	0.289399	1	0.789	1	ELMSAN1	0.0763425	0.514152	0.455	0.235	1	VASH2	0.0176792	0.378218	0.643	0.459	1
												PUM1	0.111253	0.40322	0.5	0.305	1	FUS	0.0777879	0.330369	1	0.912	1	2020-09-15	0.0177045	0.303922	0.857	0.694	1
												ZNF581	0.11173	-0.349264	0.5	0.673	1	UQCR10	0.0784669	0.348824	0.909	0.949	1	MRPS6	0.0177045	0.303108	1	0.671	1
												PAFAH1B2	0.111745	0.255525	0.5	0.274	1	MRPL1	0.0793884	0.268172	0.636	0.463	1	MDFI	0.0179493	0.281944	0.929	0.682	1
												ATP5A1	0.112007	-0.358231	0.667	0.987	1	SRRM1	0.0827659	0.255263	1	0.882	1	CALU	0.0181188	0.280857	0.929	0.847	1
												NDUFS5	0.112008	-0.300979	0.833	0.991	1	FSTL1	0.0827659	-0.363196	0.818	0.897	1	PNKD	0.0183446	0.290211	0.786	0.565	1
												CHODL	0.112163	-0.362124	0	0.309	1	LAMP2	0.0857553	0.316589	0.727	0.478	1	SELT	0.0183851	0.265822	0.786	0.506	1
												LYPLA1	0.112163	-0.25098	0	0.309	1	RNF26	0.0857821	-0.326494	0.273	0.478	1	XRCC6	0.0184269	0.458368	0.929	0.588	1
												EMC3	0.112163	-0.256085	0	0.309	1	MRPL52	0.086468	0.263946	0.818	0.684	1	PPA1	0.018429	-0.334681	0.786	0.824	1
												TUBB6	0.112163	-0.256448	0	0.309	1	KRT17	0.0873936	-0.998927	0.091	0.346	1	CARHSP1	0.0184712	0.370797	1	0.882	1
												PLEKHA5	0.112163	-0.265725	0	0.309	1	CD99	0.0876302	-0.250668	0.909	0.963	1	PPM1G	0.0184951	0.254652	0.857	0.482	1
												PPP1R14A	0.112163	-0.318491	0	0.309	1	ZFP36L1	0.0882164	-0.359397	0.727	0.926	1	GNG5	0.0185311	0.353627	1	0.988	1
												FAM195B	0.112449	-0.324545	0.333	0.677	1	FABP5	0.0883225	-0.390039	1	0.971	1	SAP18	0.0187521	0.260249	0.929	0.918	1
												SMC3	0.112638	-0.304001	0.167	0.552	1	CCT6A	0.0889212	0.291118	0.909	0.824	1	AKAP8L	0.018779	0.251839	0.786	0.365	1
												TUBB2B	0.11302	-0.436407	0.5	0.726	1	C1QBP	0.089571	0.265441	1	0.897	1	GLUL	0.0188043	0.262691	0.857	0.541	1
												CNBP	0.113096	0.319481	1	0.874	1	TMEM47	0.089628	-0.259291	0.727	0.684	1	SNRNP27	0.0190637	0.263029	0.929	0.671	1
												SMARCC1	0.113509	0.385354	0.667	0.471	1	DUT	0.089708	0.251215	0.909	0.985	1	NUDC	0.0194724	0.30717	0.929	0.729	1
												RCN1	0.113732	0.3339	0.833	0.87	1	PCNA	0.0898478	0.303979	0.818	0.699	1	2020-09-07	0.0195562	0.391437	1	0.976	1
												AEBP1	0.114092	-0.293235	0.167	0.457	1	ZFHX3	0.0916371	-0.254328	0.545	0.654	1	ST13	0.0195566	0.337265	1	1	1
												SERTAD3	0.114794	0.294605	0.5	0.296	1	SRPK1	0.0923809	0.252183	0.727	0.544	1	CFL1	0.0200873	0.274634	1	0.976	1
												ACVR2A	0.115558	-0.363609	0.333	0.74	1	ARL6IP1	0.0935443	-0.935276	0.636	0.787	1	PYCR1	0.0202208	0.281331	0.714	0.4	1
												ZNF444	0.11568	-0.250715	0	0.305	1	ANXA5	0.0944768	0.264588	0.909	0.89	1	ATXN10	0.020221	0.274284	0.857	0.553	1
												NUPR1	0.11589	-0.566198	1	0.865	1	OAZ2	0.094698	0.296647	1	0.824	1	MRPS21	0.0203443	-0.298156	0.929	0.941	1
												ARL4A	0.117041	-0.420793	0.167	0.511	1	WDR54	0.0947258	-0.259325	0.545	0.735	1	GNL3	0.0203857	0.278179	0.714	0.471	1
												TMCO1	0.118088	-0.304314	0.167	0.529	1	MYF5	0.0948512	-0.316229	0.091	0.331	1	COX7B	0.0206274	0.411342	1	0.953	1
												CCDC34	0.118607	-0.321861	0.167	0.511	1	HNRNPAB	0.0953345	0.264991	0.818	0.691	1	CYB5B	0.0208206	0.293075	0.786	0.482	1
												HADHB	0.119123	-0.273133	0.167	0.596	1	FKBP10	0.0955947	-0.262111	0.727	0.86	1	NDUFB9	0.0211653	0.277278	1	0.918	1
												MYC	0.119123	-0.412212	0.333	0.592	1	SLC25A11	0.0968203	0.296968	0.818	0.632	1	TROVE2	0.0214242	0.305823	0.786	0.529	1
												TBCA	0.119224	0.39879	1	0.964	1	RWDD4	0.0969461	0.313644	0.545	0.412	1	RALY	0.0215679	0.28593	1	0.682	1
												ANAPC15	0.119287	-0.251711	0	0.3	1	ADI1	0.09807	0.500848	0.545	0.5	1	FAM213A	0.0216501	0.36644	0.929	0.8	1
												GGNBP2	0.119287	-0.28232	0	0.3	1	C8orf59	0.0997077	0.333515	1	0.89	1	DNAJB11	0.0220246	0.261198	0.857	0.518	1
												MYDGF	0.121131	-0.339059	0.5	0.767	1	EIF4EBP1	0.0998489	-0.361868	0.727	0.956	1	POLR2I	0.0220586	0.293915	1	0.812	1
												MED28	0.121254	0.433661	0.833	0.61	1	NPC2	0.0998604	0.271558	1	0.941	1	YWHAG	0.0226396	0.300741	0.714	0.541	1
												ZNF84	0.121383	0.281002	0.333	0.139	1	PLK1	0.100211	-0.496449	0.182	0.39	1	NDUFB6	0.0228321	0.420805	0.857	0.671	1
												ATP5C1	0.121663	-0.285219	0.833	0.857	1	RFC4	0.100718	0.274898	0.727	0.596	1	PPDPF	0.0229361	0.266224	1	1	1
												ANAPC10	0.122986	-0.266267	0	0.296	1	ARL16	0.102866	0.292539	0.727	0.625	1	DIXDC1	0.0231432	-0.264132	0.214	0.494	1
												PKM	0.125877	0.369465	1	0.825	1	LZIC	0.104864	0.271761	0.727	0.551	1	SNAPIN	0.0232523	0.260335	0.857	0.576	1
												RAC1	0.126669	-0.334275	0.5	0.919	1	METTL9	0.105728	0.288049	0.818	0.875	1	ARPC4	0.0235709	0.286444	0.857	0.588	1
												CBR1	0.126779	-0.252953	0	0.291	1	NAA10	0.10589	0.252252	0.818	0.779	1	HMGB3	0.0236465	0.294432	0.786	0.506	1
												GUCY1A3	0.126779	-0.29334	0	0.291	1	BCAT1	0.106313	0.329868	0.636	0.493	1	SRSF7	0.0236487	0.294861	0.857	0.647	1
												TPI1	0.12678	-0.353166	1	0.942	1	CDK1	0.106733	-0.539615	0.818	0.824	1	RCAN2	0.0236717	-0.326601	0.071	0.376	1
												SLC44A1	0.127035	-0.318634	0.167	0.448	1	CACYBP	0.108454	0.29594	0.818	0.831	1	LAGE3	0.0237924	0.263187	0.857	0.624	1
												DCTN2	0.1277	-0.348435	0.667	0.776	1	STAG2	0.109575	0.351858	0.909	0.757	1	COL1A1	0.0238136	-0.670071	0.714	0.847	1
												GTF2H2	0.127806	0.255071	0.5	0.287	1	NDC80	0.109779	-0.273548	0.364	0.588	1	FGFR4	0.024166	0.293775	0.643	0.329	1
												POLR2G	0.129647	-0.324671	0.333	0.749	1	HES4	0.110581	-0.296049	0.727	0.882	1	BEX4	0.024275	0.251895	0.929	0.671	1
												JUNB	0.129862	-0.466684	0.5	0.713	1	MYH10	0.112484	0.276623	0.818	0.581	1	TMEM147	0.0242899	0.267578	0.929	0.718	1
												SARS	0.129962	-0.309989	0.333	0.605	1	C11orf31	0.114071	0.270505	1	0.882	1	CSRP2	0.0244146	-0.501529	0.929	0.894	1
												ACTA2	0.130152	0.266929	0.667	0.399	1	CCND1	0.115935	0.2816	0.545	0.368	1	GNB2	0.0245478	0.259771	0.929	0.741	1
												C1orf123	0.130175	-0.250881	0.167	0.435	1	ENOPH1	0.116108	0.268508	0.636	0.412	1	NPW	0.0252702	-0.290911	0	0.282	1
												EIF2A	0.131022	-0.301576	0.5	0.664	1	TUBB2B	0.117712	-0.298876	1	0.963	1	PRDX1	0.0261199	0.350191	0.929	0.953	1
												BEX4	0.131123	-0.338129	0.333	0.637	1	OLA1	0.11938	0.262577	1	0.919	1	ERH	0.0261287	0.359575	1	0.976	1
												CDH15	0.131221	0.314484	0.667	0.61	1	TRAM1	0.121289	-0.257439	0.909	0.831	1	COA3	0.0265331	0.291655	0.857	0.553	1
												MRPS17	0.133351	0.270243	0.333	0.148	1	FAM83D	0.123296	-0.293786	0.091	0.294	1	PSMA7	0.0266774	0.35579	1	0.859	1
												FCGRT	0.133476	-0.352213	0.667	0.816	1	CXCL14	0.123313	-0.300174	0	0.184	1	SH3BGR	0.0267686	0.320113	0.429	0.188	1
												MIEN1	0.134028	-0.262834	0.167	0.448	1	FABP7	0.123313	-0.635357	0	0.184	1	LAMTOR5	0.0268072	0.2729	1	0.953	1
												PYCR1	0.13449	-0.293569	0.167	0.529	1	MACF1	0.124485	0.255286	0.909	0.625	1	CCT7	0.0269621	0.285662	1	0.659	1
												TMEM256	0.134515	0.415338	0.833	0.892	1	KDELR2	0.124787	-0.262993	1	0.971	1	CALM3	0.0272426	0.324498	1	0.729	1
												RBX1	0.136253	-0.318758	0.833	0.91	1	TUBA1B	0.124791	-0.325951	1	1	1	RWDD1	0.0272426	0.271906	1	0.729	1
												HSPA8	0.136368	-0.314581	1	0.942	1	PHAX	0.12507	0.27744	0.545	0.397	1	SMAD5	0.0280438	0.324108	0.643	0.329	1
												TSPYL1	0.137962	0.438219	0.333	0.152	1	FDPS	0.125785	0.268154	1	0.824	1	KCNQ1OT1	0.0281434	0.366633	1	0.882	1
												PSMC6	0.13974	-0.30347	0.167	0.529	1	P4HB	0.126602	-0.279885	0.818	0.978	1	MBD4	0.0284788	-0.251315	0.286	0.541	1
												DAD1	0.140343	-0.293861	0.667	0.83	1	LDHA	0.128442	-0.53962	1	0.963	1	PCNP	0.0303149	0.266366	1	0.859	1
												PRRT1	0.141842	0.257222	0.333	0.143	1	CDKN3	0.131058	-0.575683	0.636	0.676	1	CAPN6	0.0303226	-0.288637	0.357	0.588	1
												CNOT7	0.142822	-0.265579	0.167	0.43	1	TTLL7	0.131087	0.336975	0.545	0.456	1	ACTC1	0.0304616	-0.519769	1	1	1
												SPATS2L	0.143096	0.270512	1	0.969	1	NEXN	0.133078	0.294251	0.455	0.294	1	HIGD1A	0.0305815	0.285735	0.786	0.447	1
												CLTA	0.143099	0.254032	1	0.978	1	MORF4L2	0.137958	0.287916	1	0.985	1	STIP1	0.0306953	0.265477	0.786	0.424	1
												C1QTNF3	0.143574	-0.391444	0.333	0.83	1	CENPE	0.142808	-0.413748	0.364	0.537	1	GPX1	0.0307358	0.314008	1	0.788	1
												SLC3A2	0.144726	-0.298317	0.167	0.43	1	KIF14	0.147609	-0.268051	0.182	0.346	1	TUBA4A	0.0311535	0.257659	0.5	0.247	1
												FAM215B	0.145987	0.260467	0.333	0.152	1	PDIA6	0.148972	0.259682	0.909	0.934	1	PABPC1	0.0320362	0.280489	1	0.988	1
												TCEAL8	0.146134	0.393486	0.833	0.874	1	BTG1	0.153195	-0.279516	0.909	0.949	1	MIR503HG	0.0320474	-0.271929	0.286	0.576	1
												COL1A2	0.146543	0.255005	1	1	1	TOP2A	0.155147	-0.602078	0.818	0.816	1	ZNF677	0.0324138	0.260547	0.643	0.306	1
												CCNC	0.146649	-0.270382	0.167	0.43	1	COL6A2	0.155293	-0.329258	0.909	0.934	1	ITM2A	0.0329077	-0.545008	0.571	0.765	1
												UQCRC1	0.146851	-0.266233	0.167	0.439	1	HMMR	0.158203	-0.252401	0.273	0.507	1	PPP3CA	0.0333141	0.256184	0.714	0.482	1
												NDUFA5	0.147499	0.278003	0.667	0.664	1	FAM162A	0.162375	-0.345539	0.818	0.86	1	HMGN2	0.0336812	0.466198	1	1	1
												H2AFY	0.147718	0.261465	0.667	0.471	1	CENPF	0.166156	-0.71739	0.909	0.809	1	CKS1B	0.0340357	0.274584	0.857	0.588	1
												ZCCHC11	0.147873	0.309309	0.667	0.462	1	FBLN1	0.167406	-0.40187	0.818	0.941	1	METAP2	0.034417	0.366546	0.929	0.8	1
												HNRNPA0	0.148205	0.252076	1	0.924	1	MGP	0.171448	0.387853	0.818	0.662	1	WSB1	0.0345296	-0.308864	1	0.976	1
												ACTR1B	0.148591	-0.275441	0.167	0.43	1	MMAB	0.171472	0.360131	0.636	0.485	1	NIPBL	0.0347015	0.26	0.714	0.424	1
												MRPS6	0.148853	-0.318018	0.333	0.587	1	PGRMC1	0.17249	0.267296	0.909	0.846	1	AC018647.3	0.0348683	0.261616	0.571	0.318	1
												CHMP5	0.150796	-0.327177	0.5	0.744	1	KCNQ1OT1	0.174284	0.364845	0.909	0.926	1	EGR1	0.0349167	-0.419021	0.357	0.553	1
												MTHFD2L	0.151359	0.253107	0.333	0.135	1	GPX8	0.175224	-0.268873	0.818	0.809	1	MZT2A	0.0354492	-0.259315	0.786	0.847	1
												CLTC	0.15185	0.252767	0.5	0.283	1	PCOLCE	0.177049	-0.297322	0.727	0.794	1	GLO1	0.0364096	0.272755	1	0.765	1
												CREBRF	0.152372	0.273796	0.333	0.148	1	ZDHHC21	0.178958	0.356411	0.364	0.25	1	EFHC1	0.0365444	-0.254671	0.357	0.6	1
												COX14	0.152534	-0.265951	0.167	0.43	1	C5orf24	0.180527	0.263443	0.727	0.662	1	MRLN	0.0371382	0.305287	1	0.906	1
												ANAPC11	0.153459	0.303351	1	0.906	1	SVIP	0.181214	0.316151	0.636	0.456	1	PRKCDBP	0.0371424	0.278718	0.643	0.353	1
												PSIP1	0.154899	-0.295436	0.333	0.65	1	DDIT3	0.18196	-0.290395	0.182	0.36	1	TATDN1	0.0377064	-0.275304	0.857	0.835	1
												USMG5	0.155048	0.251812	1	0.874	1	BIRC5	0.18729	-0.40402	0.909	0.89	1	HN1	0.0380902	0.403153	1	0.929	1
												PTPRS	0.155082	0.299921	0.5	0.287	1	CENPA	0.193338	-0.464673	0.364	0.485	1	DCN	0.0381105	-0.376607	1	0.976	1
												ARPC1A	0.155163	0.306478	0.667	0.48	1	ZNF93	0.193374	0.289689	0.455	0.368	1	IMPDH2	0.0390414	-0.290625	1	0.941	1
												TANK	0.155215	0.413987	0.5	0.341	1	AKAP9	0.194628	0.252119	0.909	0.794	1	MYOG	0.0390517	-0.287548	0.929	0.976	1
												LOXL1	0.156142	-0.318305	0.167	0.493	1	DDX10	0.19483	0.305592	0.545	0.36	1	CD164	0.0393172	-0.386867	0.857	0.8	1
												ADSL	0.156767	0.257494	0.667	0.43	1	SAT1	0.195104	-0.253769	0.455	0.618	1	MACROD1	0.0396131	0.260663	0.857	0.588	1
												AZI2	0.157953	-0.277378	0.167	0.498	1	RRM1	0.197911	0.267079	0.818	0.618	1	NDUFC1	0.0404508	0.356145	0.786	0.624	1
												FTSJ2	0.15796	0.267836	0.333	0.161	1	CCDC66	0.201134	0.280818	0.727	0.566	1	RAB11B	0.0405445	0.257803	0.786	0.612	1
												APP	0.158346	-0.356521	0.667	0.852	1	MKI67	0.207791	-0.3805	0.636	0.743	1	HIST1H1C	0.0414141	0.475627	0.571	0.318	1
												AIP	0.158678	-0.26316	0.167	0.471	1	HIST1H1D	0.213372	-0.316419	0.636	0.831	1	SYF2	0.0414859	0.298412	0.929	0.812	1
												IGFBP3	0.159004	-0.473573	0.333	0.655	1	STX10	0.2357	0.256211	0.636	0.588	1	SOD1	0.0418634	0.295343	1	0.871	1
												HSPB11	0.160293	-0.25657	0.167	0.417	1	TPM4	0.237362	-0.329396	0.818	0.985	1	ETHE1	0.0423878	-0.250719	0.214	0.494	1
												SLC39A1	0.160436	-0.274794	0.167	0.422	1	C1QTNF3	0.238528	0.355052	0.909	0.89	1	FCGRT	0.0432649	-0.303546	0.429	0.647	1
												PDZD11	0.160763	-0.264223	0.167	0.466	1	HMGB2	0.240297	-0.337279	1	0.971	1	FNTA	0.0447523	-0.262057	0.357	0.6	1
												TCEAL1	0.161184	0.303624	0.5	0.336	1	CCNB1	0.240405	-0.633647	0.364	0.5	1	PPIG	0.044992	0.251924	0.929	0.882	1
												SENP6	0.161491	0.251383	0.5	0.296	1	NCBP2	0.241299	0.288947	0.727	0.654	1	HIST1H1D	0.0455271	-0.32144	0.214	0.447	1
												DYNLRB1	0.161781	-0.272718	0.833	0.83	1	PKIG	0.245235	0.264417	0.636	0.566	1	PEA15	0.0468683	-0.301545	0.5	0.671	1
												TLE4	0.163714	0.253559	0.333	0.161	1	UBE2S	0.247986	-0.428042	0.636	0.691	1	ALDH1A1	0.0469871	-0.519898	0.143	0.376	1
												DLEU1	0.164139	-0.270825	0.167	0.493	1	RBMS3	0.251952	-0.255088	0.636	0.596	1	EIF4E	0.0471736	0.274285	0.786	0.553	1
												SLC38A2	0.164472	0.355431	0.5	0.345	1	GTSE1	0.253138	-0.368669	0.636	0.676	1	OLFM2	0.0475008	0.253355	0.786	0.482	1
												MGST3	0.165084	-0.265559	0.833	0.861	1	TUBA1A	0.261563	-0.350953	1	0.978	1	C9orf16	0.0477022	-0.251684	0.929	0.871	1
												NUTF2	0.165907	0.282899	0.833	0.565	1	PHGDH	0.263058	-0.269958	0.727	0.949	1	TNRC6B	0.0482404	0.277215	0.857	0.588	1
												IFI27L1	0.166353	-0.273253	0.167	0.489	1	DES	0.274798	0.3761	0.818	0.772	1	MPST	0.0490485	-0.262763	0.714	0.847	1
												MUM1	0.166861	0.296107	0.667	0.457	1	TCEAL7	0.277183	0.299397	0.636	0.588	1	GSTP1	0.0496092	0.274547	1	0.941	1
												GABPB1-AS1	0.167486	0.412014	0.833	0.83	1	DEPDC1	0.281179	-0.317473	0.636	0.625	1	COL1A2	0.0508012	0.362398	1	0.988	1
												FGF9	0.168064	-0.261273	0.167	0.498	1	MYOD1	0.287336	0.350253	0.636	0.515	1	BZW1	0.0511306	0.272111	0.857	0.6	1
												HNRNPM	0.168116	0.311464	0.667	0.444	1	RBM26	0.292421	0.257836	0.545	0.441	1	EFHD2	0.0527205	-0.358227	0.214	0.506	1
												CDC26	0.168479	0.283953	0.667	0.601	1	BLM	0.31056	0.259876	0.364	0.257	1	LRRC17	0.0532081	0.326846	0.571	0.294	1
												TNIK	0.169131	0.255684	0.333	0.152	1	USP33	0.310864	0.319683	0.545	0.39	1	OCIAD1	0.053969	0.303697	1	0.812	1
												PLAGL1	0.169985	0.271832	0.667	0.507	1	UBA6	0.325309	0.264314	0.455	0.426	1	PSMB6	0.0541368	0.307413	1	0.835	1
												MRPL19	0.170711	0.287313	0.5	0.363	1	ID3	0.334761	-0.275346	0.727	0.949	1	GPX4	0.0544756	0.305459	1	0.976	1
												MGP	0.173146	-0.614709	0.5	0.789	1	XPO1	0.345858	0.261117	0.818	0.647	1	GAPDH	0.0544764	-0.268797	1	1	1
												TAF9	0.173203	-0.265782	0.167	0.471	1	FAT1	0.350338	0.252273	0.636	0.507	1	CTA-29F11.1	0.0554991	-0.2967	0.071	0.318	1
												MTF2	0.174035	0.395346	0.5	0.35	1	HIST1H4C	0.355524	0.646042	1	0.993	1	SRI	0.0565482	0.335942	0.786	0.635	1
												MRPS16	0.174737	-0.262537	0.333	0.632	1	CTGF	0.359772	-0.30227	0.273	0.375	1	BAX	0.0576718	0.327637	0.857	0.729	1
												VKORC1	0.17481	0.253609	0.833	0.861	1	LY6H	0.364473	-0.423206	0.182	0.301	1	CTHRC1	0.0585519	0.25998	0.571	0.306	1
												OLFM2	0.175269	0.296358	0.5	0.363	1	TMEM261	0.371177	0.26619	0.818	0.743	1	VPS25	0.0586208	0.2712	0.786	0.565	1
												SEPP1	0.175334	-0.353543	0	0.242	1	TAGLN	0.386112	-0.567779	0.818	0.846	1	KRTCAP2	0.05975	0.253681	0.714	0.424	1
												FSTL1	0.17586	-0.303566	0.5	0.731	1	PCSK1N	0.395312	-0.253934	0.182	0.279	1	AKAP12	0.065232	0.283041	0.714	0.494	1
												C20orf27	0.176729	-0.265724	0.333	0.682	1	MYL1	0.398083	-0.413756	0.273	0.353	1	C20orf27	0.0655989	-0.262193	0.571	0.635	1
												ARHGAP5	0.176815	0.251899	0.667	0.435	1	TMCO3	0.398098	0.291963	0.636	0.449	1	ATP1B3	0.0666944	0.387746	0.857	0.647	1
												KLHL41	0.17703	-0.43942	0.333	0.547	1	FGFR4	0.401628	0.257985	0.455	0.375	1	BPTF	0.0677185	0.25989	0.857	0.6	1
												ARL6IP5	0.177865	-0.291188	0.667	0.776	1	ATP1B1	0.415301	-0.354755	0.182	0.25	1	NELFE	0.0683924	-0.264548	0.429	0.541	1
												MDK	0.178313	-0.36365	1	0.924	1	GPC3	0.441605	0.648227	0.909	0.926	1	CYB5R3	0.0704191	0.251404	0.786	0.506	1
												PSMB3	0.179587	0.271489	1	0.758	1	NTRK2	0.495898	-0.29259	0.182	0.279	1	DMPK	0.0721961	0.360166	1	0.788	1
												TMEM106C	0.179635	-0.252621	0.167	0.408	1	EFNB3	0.542416	-0.280765	0.273	0.294	1	HSPB2	0.0736875	0.332228	0.429	0.259	1
												STX5	0.179635	-0.252775	0.167	0.408	1	APOE	0.567709	0.476388	0.455	0.5	1	FBL	0.0743503	-0.255156	0.714	0.894	1
												HES4	0.18013	-0.320391	0.167	0.43	1	ACTC1	0.570463	-0.313823	0.818	0.75	1	ARPC5L	0.077971	0.25335	0.643	0.435	1
												FKBP2	0.180255	-0.320153	0.5	0.717	1	NLRP1	0.574433	-0.346323	0.545	0.588	1	PDIA6	0.0792957	0.277863	1	0.835	1
												CRABP2	0.182386	-0.28816	0.333	0.605	1	CLEC3A	0.582511	-0.292252	0.091	0.14	1	TNNT2	0.0797101	-0.454731	1	0.953	1
												COL6A2	0.183978	-0.341996	0.833	0.865	1	OGN	0.598101	-0.292508	0.727	0.64	1	TUBA1A	0.081451	0.383075	1	0.953	1
												TCEAL7	0.184787	0.295482	0.667	0.471	1	LPP	0.630286	0.33904	0.455	0.478	1	PTMS	0.0814604	0.335439	1	0.988	1
												LMAN1	0.185989	-0.281224	0.333	0.641	1	TSC22D3	0.759523	0.35039	0.636	0.86	1	S100A4	0.0839915	-0.512429	0.286	0.482	1
												ARMCX3	0.186227	-0.297271	0.5	0.695	1	KPNA2	0.767484	-0.425523	0.909	0.662	1	TUBA1B	0.085035	0.59289	1	0.988	1
												PRDX1	0.186506	-0.30813	0.667	0.933	1	CLU	0.80982	-0.466242	0.636	0.581	1	PRR13	0.0859098	0.272819	0.786	0.6	1
												CUTA	0.186583	-0.267101	0.833	0.964	1	TUBB4B	0.815919	-0.386017	0.727	0.809	1	BIRC5	0.0878511	0.368028	0.143	0.035	1
												CHD4	0.187121	0.316991	0.667	0.534	1	EGFL6	0.831065	0.428692	0.091	0.125	1	MYL9	0.0880023	0.520145	0.786	0.659	1
												ARPC3	0.187386	-0.25704	0.833	0.897	1	FAM64A	0.86723	-0.284597	0.727	0.596	1	RXRG	0.0888011	-0.338951	0.5	0.682	1
												BRD3	0.187779	0.294476	0.667	0.57	1	NDUFA4L2	0.894858	0.469996	0.455	0.463	1	MYH3	0.0897665	-0.969671	0.571	0.671	1
												SAR1A	0.188701	-0.260117	0.167	0.471	1	ACTG2	0.929714	-0.331589	0.727	0.559	1	RASSF4	0.0899406	-0.437306	0.714	0.753	1
												LAMA4	0.191147	-0.35906	0.167	0.466	1							RGS4	0.0925982	-0.38507	0.143	0.365	1
												C15orf61	0.191627	-0.263602	0.167	0.444	1							ALDOA	0.094528	-0.322511	1	1	1
												HSP90AA1	0.192371	-0.31003	0.667	0.87	1							PAPSS1	0.0963397	-0.303043	0.643	0.718	1
												CLIC1	0.192803	-0.25436	0.833	0.825	1							MDM1	0.0979202	-0.333713	0.429	0.518	1
												PFN1	0.193916	-0.301838	0.833	0.933	1							CDC42	0.0983263	-0.341165	1	0.871	1
												CBX3	0.194045	0.336439	1	0.83	1							HSPA5	0.102332	0.287451	1	0.847	1
												SKA2	0.19588	-0.27318	0.167	0.399	1							JUN	0.103067	-0.462878	0.214	0.4	1
												ZC3H14	0.197676	0.260916	0.333	0.17	1							HSPB3	0.105957	-0.36886	0.643	0.694	1
												STX8	0.198755	-0.266669	0.167	0.444	1							THEMIS2	0.106055	-0.306992	0.286	0.471	1
												VDAC3	0.200421	0.263518	0.833	0.596	1							STIM2	0.106914	0.253986	0.5	0.282	1
												PSAP	0.200668	0.389739	0.667	0.762	1							HSP90AA1	0.109224	0.279025	1	0.976	1
												OCIAD1	0.201514	-0.264767	0.667	0.731	1							SBDS	0.11228	-0.30959	0.786	0.894	1
												TPGS2	0.201674	-0.266247	0.333	0.565	1							LUM	0.112295	-0.569934	0.357	0.482	1
												CDK4	0.202173	-0.291133	0.5	0.726	1							MOXD1	0.12354	-0.252613	0.357	0.506	1
												NCL	0.203773	0.263852	0.833	0.946	1							RANBP1	0.124717	0.285495	0.929	0.812	1
												ZYX	0.205515	0.28428	0.333	0.175	1							MYL1	0.126118	-1.09507	0.786	0.847	1
												ATP5SL	0.206258	-0.262911	0.167	0.426	1							UBE2E3	0.130168	0.352782	0.857	0.859	1
												NIFK	0.208396	-0.252472	0.333	0.547	1							SPG21	0.130643	-0.298526	0.929	0.929	1
												NARS	0.208644	0.274827	0.667	0.462	1							LNPEP	0.132429	-0.25542	0.5	0.588	1
												HNRNPUL1	0.208744	0.426239	0.5	0.408	1							CTGF	0.133598	-0.337044	0.071	0.282	1
												MAP1A	0.210582	0.317825	0.5	0.341	1							HNRNPU	0.139909	0.385653	0.786	0.718	1
												BASP1	0.211054	0.317026	0.667	0.556	1							GNAS	0.143988	-0.286509	1	0.988	1
												CCDC85B	0.211097	0.27765	0.667	0.614	1							IFI6	0.157441	-0.325241	0.143	0.329	1
												NUDC	0.211762	0.365391	0.667	0.529	1							ARPP21	0.158205	-0.297372	0.857	0.941	1
												BTG2	0.212897	-0.285683	0.167	0.381	1							HNRNPA2B1	0.158264	0.335609	1	0.953	1
												KLF6	0.213445	-0.278754	0.333	0.534	1							CCND2	0.160053	-0.370218	0.571	0.647	1
												CD63	0.213975	-0.341942	0.833	0.96	1							NUCKS1	0.161149	0.309976	1	0.906	1
												SEC63	0.214905	-0.250046	0.333	0.543	1							MYLPF	0.170387	-0.756631	0.929	0.929	1
												CHCHD10	0.215239	-0.274356	0.333	0.668	1							LAMA4	0.184429	-0.39441	0.643	0.718	1
												MPC2	0.215352	-0.261203	0.333	0.619	1							HADHB	0.200978	0.270835	0.857	0.612	1
												IER3IP1	0.221898	-0.258249	0.333	0.556	1							TIMP1	0.225605	-0.312025	0.857	0.859	1
												PAICS	0.223217	-0.28269	0.333	0.565	1							SIRT2	0.233532	-0.309277	0.857	0.871	1
												SSNA1	0.224386	-0.250107	0.333	0.556	1							HNRNPD	0.245369	0.334738	0.714	0.565	1
												IFITM2	0.224493	-0.366014	0.5	0.646	1							HIST3H2A	0.254192	-0.362592	0.357	0.494	1
												ARL6IP4	0.225523	0.270806	0.833	0.906	1							SYNPO2L	0.270719	0.315956	0.5	0.341	1
												STXBP6	0.22599	-0.271898	0.333	0.605	1							TUBB6	0.278813	0.256809	0.714	0.588	1
												S100A4	0.225991	-0.329411	0.333	0.628	1							ARL4A	0.29393	-0.280254	0.286	0.353	1
												PTTG1	0.22602	-0.254359	0	0.202	1							SLN	0.317745	-0.838639	0.214	0.306	1
												MLLT11	0.228395	0.291026	0.833	0.789	1							MYOD1	0.327207	-0.303017	0.857	0.894	1
												COX6A1	0.229284	0.261816	1	0.937	1							MEF2C	0.327569	0.323769	0.714	0.647	1
												TMEM45A	0.22941	-0.299023	0.5	0.646	1							JUNB	0.390096	-0.286238	0.429	0.412	1
												TCEA3	0.23005	0.462016	0.333	0.197	1							PTTG1	0.419215	0.463334	0.286	0.2	1
												PNRC1	0.232348	-0.27044	0.5	0.87	1							TUBB	0.430498	0.320282	1	0.941	1
												HIST1H2AC	0.234123	-0.281643	0.167	0.368	1							CITED2	0.455446	-0.299996	0.571	0.529	1
												IFI6	0.234363	-0.334305	0.167	0.372	1							AHNAK2	0.462014	-0.276598	0.786	0.659	1
												GPX7	0.236111	-0.281803	0.5	0.7	1							HMGB1	0.510701	0.298444	1	1	1
												PRDX4	0.239745	-0.271851	0.333	0.574	1							ID2	0.529202	-0.294371	0.357	0.247	1
												CYTL1	0.240845	-0.378518	0.167	0.413	1							ATP1B1	0.5525	-0.282961	0.143	0.082	1
												SND1	0.242904	0.259742	0.667	0.637	1							CXCL14	0.619421	-0.297066	0.143	0.176	1
												TUBA1A	0.243338	-0.358399	0.667	0.852	1							CDKN1A	0.653224	-0.461526	0.643	0.565	1
												OGN	0.245672	-0.408543	0.5	0.691	1							PTN	0.71246	-0.342976	0.857	0.765	1
												S100A16	0.246417	-0.282348	0.333	0.605	1							CRYAB	0.734964	-0.610175	0.929	0.741	1
												SPG20	0.246833	0.275931	0.5	0.332	1							RBP1	0.8517	0.344508	0.857	0.753	1
												NHP2	0.251563	-0.27795	0.5	0.722	1							NDUFA4L2	0.91219	0.369694	0.214	0.271	1
												LMAN2	0.256961	-0.250952	0.5	0.637	1							MYF6	0.956253	-0.379178	0.5	0.447	1
												PLTP	0.258316	-0.269043	0.167	0.395	1							TNNI2	0.958172	-0.6266	0.357	0.365	1
												CCNG2	0.258743	0.258111	0.667	0.637	1							FOS	0.995546	-0.407152	0.5	0.412	1
												YME1L1	0.260676	0.284649	0.5	0.291	1							ACTA1	1	-0.289332	0.571	0.553	1
												ATP6AP2	0.260843	-0.260136	0.333	0.52	1
												MRPL22	0.260957	0.30049	0.5	0.363	1
												ZNF638	0.263666	0.260034	0.667	0.511	1
												COL5A2	0.264621	-0.25603	0.333	0.578	1
												COMT	0.266389	-0.255805	0.167	0.354	1
												C1D	0.267246	0.260875	0.5	0.399	1
												MTX3	0.268457	0.345347	0.167	0.063	1
												ENO1	0.270001	-0.408205	0.833	0.883	1
												DLGAP4	0.27116	0.30462	0.5	0.323	1
												PSMD14	0.277734	0.274908	0.5	0.323	1
												POLDIP2	0.278732	0.325533	0.5	0.336	1
												2020-09-15	0.284295	-0.265735	0.5	0.7	1
												MYF5	0.292898	-0.295276	0.167	0.377	1
												TAOK1	0.293855	0.308451	0.333	0.215	1
												HDLBP	0.298637	-0.259666	0.833	0.825	1
												IFITM3	0.301141	-0.286833	0.833	0.901	1
												PRKRA	0.302131	0.319932	0.5	0.332	1
												NNT-AS1	0.306896	0.323915	0.333	0.197	1
												MT-ND4	0.307265	0.263797	1	1	1
												MFAP2	0.308906	-0.272468	0.5	0.695	1
												ADPRM	0.310038	0.311648	0.333	0.215	1
												PDLIM4	0.313759	-0.314444	0.5	0.7	1
												2020-09-07	0.316221	-0.250122	1	0.973	1
												MRPS18B	0.316636	-0.250225	0.5	0.641	1
												BLVRB	0.321729	-0.25425	0.5	0.646	1
												UBAC1	0.32487	0.307291	0.333	0.229	1
												EIF4G2	0.326423	0.4445	0.833	0.753	1
												ZNF277	0.326551	0.259915	0.5	0.386	1
												MAGED2	0.328084	-0.251206	0.667	0.892	1
												FBLN1	0.333933	-0.349672	0.667	0.861	1
												MT-CYB	0.334654	0.409532	1	0.978	1
												EYA4	0.337741	0.316439	0.333	0.193	1
												DNMT3A	0.340387	0.428607	0.333	0.211	1
												UBE3A	0.346922	0.297304	0.5	0.435	1
												ALKBH5	0.349637	0.329601	0.5	0.341	1
												RPL22L1	0.353751	-0.256068	0.833	0.964	1
												BAX	0.359866	-0.250694	0.5	0.556	1
												PTN	0.361576	-0.417908	0.833	0.888	1
												NREP	0.362583	0.266083	0.667	0.583	1
												IER2	0.372376	-0.429026	0.5	0.664	1
												PHGDH	0.375278	-0.271977	0.833	0.722	1
												KARS	0.37903	0.282617	0.5	0.462	1
												NGFR	0.38893	0.345564	0.167	0.081	1
												TNNT2	0.403752	-0.338643	0.667	0.74	1
												JUN	0.427166	-0.306308	0.333	0.538	1
												MYL1	0.454925	-0.447667	0.333	0.457	1
												UBE2E2	0.467732	0.289832	0.333	0.283	1
												KMT2C	0.502081	0.261647	0.333	0.283	1
												NIPBL	0.50819	0.311114	0.5	0.444	1
												ATP1B1	0.603712	-0.382002	0.167	0.094	1
												GUK1	0.617267	0.277004	0.833	0.915	1
												CHP1	0.637363	0.521597	0.333	0.354	1
												ACTC1	0.64186	0.61678	0.667	0.704	1
												KMT2A	0.645539	0.325961	0.333	0.296	1
												CYR61	0.666017	-0.447999	0.667	0.529	1
												SLC30A5	0.681781	0.257044	0.167	0.13	1
												KRT17	0.691235	-0.306071	0.167	0.233	1
												INSIG2	0.717529	0.289701	0.333	0.354	1
												BRD4	0.721392	0.271913	0.333	0.372	1
												CDC25B	0.809431	0.297764	0.333	0.305	1
												BFAR	0.813453	0.322271	0.333	0.404	1
												USP34	0.997073	0.298335	0.333	0.35	1
