# Supplementary material for: Modeling the ACVR1R206H mutation in human skeletal muscle stem cells
Source: eLife. 2021 Nov 10;10:e66107. doi: 10.7554/eLife.66107 (PMC8691832; doi:10.7554/eLife.66107)
Supplement: Figure 6—source data 1. [file elife-66107-fig6-data1.xlsx]

## Sheet: Figure 6-Source Data 1. BEAM an
Gene	pval	qval
AP006222.2	0	0
ENO1	0	0
MFAP2	0	0
SH3BGRL3	0	0
HMGN2	0	0
CCDC28B	0	0
MARCKSL1	0	0
C1orf122	0	0
GPX7	0	0
JUN	0	0
WLS	0	0
FNBP1L	0	0
OLFML3	0	0
PHGDH	0	0
TXNIP	0	0
RP11-14N7.2	0	0
C1orf54	0	0
MLLT11	0	0
S100A6	0	0
S100A4	0	0
RAB13	0	0
RPS27	0	0
NES	0	0
CRABP2	0	0
TNNT2	0	0
ENAH	0	0
H3F3A	0	0
GREM2	0	0
PDIA6	0	0
OST4	0	0
WDR54	0	0
ACVR2A	0	0
COL3A1	0	0
COL5A2	0	0
MYL1	0	0
IGFBP2	0	0
COL6A3	0	0
RPL15	0	0
ACVR2B	0	0
TMEM45A	0	0
FSTL1	0	0
PFN2	0	0
IGF2BP2	0	0
RPL35A	0	0
C4orf48	0	0
UCHL1	0	0
2021-09-11	0	0
SCD5	0	0
SPARCL1	0	0
OSTC	0	0
PITX2	0	0
MSMO1	0	0
TENM3	0	0
BASP1	0	0
GPX8	0	0
MAP1B	0	0
VCAN	0	0
EDIL3	0	0
NR2F1	0	0
NREP	0	0
CDO1	0	0
AP3S1	0	0
HINT1	0	0
CXCL14	0	0
SPARC	0	0
DBN1	0	0
PDLIM7	0	0
CAP2	0	0
TUBB	0	0
HLA-B	0	0
UQCC2	0	0
CCDC167	0	0
MDFI	0	0
PTK7	0	0
EEF1A1	0	0
COL12A1	0	0
MARCKS	0	0
PKIB	0	0
DYNLT1	0	0
2021-09-07	0	0
PPIA	0	0
IGFBP3	0	0
CHCHD2	0	0
GTF2I	0	0
CDK6	0	0
COL1A2	0	0
PCOLCE	0	0
AP1S1	0	0
LRRC17	0	0
HILPDA	0	0
CALU	0	0
ATP6V1F	0	0
MEST	0	0
CALD1	0	0
PDIA4	0	0
TMSB4X	0	0
EIF2S3	0	0
PCSK1N	0	0
LPAR4	0	0
ITM2A	0	0
ARMCX6	0	0
NGFRAP1	0	0
PLS3	0	0
RPL39	0	0
GPC3	0	0
NEFM	0	0
EIF4EBP1	0	0
CEBPD	0	0
FABP5	0	0
CTHRC1	0	0
COL14A1	0	0
MLLT3	0	0
TPM2	0	0
ZFAND5	0	0
PSAT1	0	0
NTRK2	0	0
KLF4	0	0
ZNF883	0	0
CDC26	0	0
NEK6	0	0
C9orf16	0	0
RPL7A	0	0
P4HA1	0	0
MYOZ1	0	0
FAM213A	0	0
ADIRF	0	0
ACTA2	0	0
PGAM1	0	0
TNNI2	0	0
IGF2	0	0
RPL27A	0	0
FIBIN	0	0
CCDC34	0	0
MPPED2	0	0
MDK	0	0
TM7SF2	0	0
SERPINH1	0	0
PRSS23	0	0
NNMT	0	0
TAGLN	0	0
THY1	0	0
CCND2	0	0
GAPDH	0	0
PTMS	0	0
MGST1	0	0
RPS26	0	0
RPL41	0	0
MYL6B	0	0
NDUFA4L2	0	0
CPM	0	0
NAP1L1	0	0
LUM	0	0
DCN	0	0
C12orf75	0	0
UBC	0	0
FGF9	0	0
PSMB5	0	0
STXBP6	0	0
NFKBIA	0	0
MEG3	0	0
CKB	0	0
ACTC1	0	0
SERF2	0	0
B2M	0	0
KIAA0101	0	0
RPLP1	0	0
LOXL1	0	0
TSPAN3	0	0
WASH4P	0	0
NME4	0	0
MRPS34	0	0
HCFC1R1	0	0
CARHSP1	0	0
QPRT	0	0
MYLPF	0	0
VKORC1	0	0
MT2A	0	0
MT1E	0	0
MT1M	0	0
MT1A	0	0
MT1X	0	0
GCSH	0	0
NLRP1	0	0
TRAPPC1	0	0
CENPV	0	0
MFAP4	0	0
IGFBP4	0	0
EIF1	0	0
LEPREL4	0	0
FKBP10	0	0
CBX1	0	0
HOXB4	0	0
COL1A1	0	0
SKA2	0	0
NACA2	0	0
DDX5	0	0
HN1	0	0
P4HB	0	0
ANAPC11	0	0
PYCR1	0	0
RAC3	0	0
SLC16A3	0	0
TYMS	0	0
CDH2	0	0
NNAT	0	0
PLTP	0	0
BSG	0	0
PLEKHJ1	0	0
GADD45B	0	0
OLFM2	0	0
JUNB	0	0
DNAJB1	0	0
PGLS	0	0
RPL18A	0	0
LSM4	0	0
ZNF90	0	0
RPSAP58	0	0
ZFP36	0	0
PLD3	0	0
PAFAH1B3	0	0
APOE	0	0
APOC1	0	0
FOSB	0	0
CALM3	0	0
AP2S1	0	0
EMP3	0	0
KDELR1	0	0
TNNT1	0	0
RPL28	0	0
ZNF580	0	0
MPST	0	0
KDELR3	0	0
FBLN1	0	0
CXADR	0	0
DONSON	0	0
MRPS6	0	0
TTC3	0	0
HMGN1	0	0
CSTB	0	0
MT-ND1	0	0
MT-ND2	0	0
MT-CO2	0	0
MT-ATP6	0	0
MT-CO3	0	0
MT-CYB	0	0
MMP23B	0	0
COL11A1	0	0
ACTG2	0	0
KIF1A	0	0
SOX2	0	0
CYTL1	0	0
AC108142.1	0	0
HIST1H1D	0	0
LAMA4	0	0
FABP7	0	0
PTN	0	0
BGN	0	0
TUSC3	0	0
STC1	0	0
RP11-11N9.4	0	0
LY6H	0	0
OGN	0	0
TNC	0	0
CTD-2034I4.2	0	0
NPW	0	0
RP11-344E13.3	0	0
MYL4	0	0
CPXM1	0	0
NKAIN4	0	0
TTYH1	0	0
GSTT1	0	0
EFNB3	4.94065645841247e-324	3.50786608547285e-322
HDLBP	1.23516411460312e-322	8.70049602326435e-321
RCN2	1.82804288961261e-322	1.28308848224972e-320
C6orf48	2.51973479379036e-322	1.76183809306989e-320
FKBP1A	2.81617418129511e-322	1.96193467963559e-320
ZNF428	9.88131291682493e-322	6.85960742685987e-320
DUSP1	2.14276270601349e-320	1.48212776833332e-318
MYL6	1.68021844837691e-319	1.15802564531792e-317
LSM12	1.04221665793273e-318	7.15742278718828e-317
PRKCB	2.45681553379247e-318	1.68121374362046e-316
PPDPF	2.70411021150539e-318	1.84387715008961e-316
SEPW1	1.27610338214881e-317	8.6707391905138e-316
TNNT3	3.66614317713823e-316	2.48226292785967e-314
JAM2	8.59946103148019e-316	5.80207144491105e-314
BRE	1.59775171331217e-315	1.07423663268153e-313
RPL23	2.12842656620977e-315	1.42604579936055e-313
RPS23	2.7086211232422e-314	1.80847484648917e-312
MGP	2.83008812174775e-314	1.88303683367261e-312
ALDOA	2.60646965490549e-313	1.72826913773032e-311
CKS1B	1.01338610394112e-312	6.6963578669015e-311
SOD2	3.92156067508232e-312	2.58245514456019e-310
MAGEF1	1.53638205989522e-310	0
TPGS2	3.66e-307	2.4e-305
MAGED1	7.63e-307	4.98e-305
2021-09-06	2.71e-306	1.76e-304
QARS	6.75e-306	4.37e-304
LAMTOR2	6.85e-306	4.42e-304
MZT2A	1.87e-305	1.2e-303
RPS14	2.89e-305	1.85e-303
CPNE1	2.88e-305	1.85e-303
TMED9	4.2e-305	2.68e-303
SLC25A39	2.85e-304	1.81e-302
RP11-380D23.2	4.42e-304	2.79e-302
SERTAD4	8.31e-303	5.24e-301
RP11-499F3.2	8.35e-303	5.24e-301
MAGED2	1.97e-302	1.23e-300
BCHE	3.21e-302	2e-300
SSR4	2.03e-301	1.26e-299
HSPA1A	2.9e-301	1.8e-299
CKM	1.41e-300	8.71e-299
ZNHIT1	3.57e-299	2.2e-297
ZNF581	4.91e-299	3.01e-297
ATOX1	5.04e-299	3.09e-297
NOP10	6.86e-299	4.19e-297
TNNC2	7.19e-299	4.38e-297
SUB1	1.29e-298	7.81e-297
TPI1	3.6e-298	2.17e-296
TCEAL8	5.07e-298	3.05e-296
COL21A1	1.68e-296	1.01e-294
AKR1C1	2.95e-296	1.77e-294
CCND1	1.15e-295	6.88e-294
PRRG3	2.26e-295	1.35e-293
PAPSS1	3.56e-295	2.11e-293
TMED3	1.5e-294	8.87e-293
POLR3D	1.83e-292	1.08e-290
PKM	5.4e-292	3.18e-290
RFX4	7.94e-291	4.66e-289
LINC00948	2.24e-290	1.31e-288
C14orf2	3.35e-290	1.95e-288
UQCR10	4.35e-290	2.52e-288
MYOD1	4.62e-290	2.68e-288
CCNG2	1.27e-289	7.31e-288
PHPT1	1.74e-288	1e-286
CALR	9.9e-288	5.69e-286
ATP5G3	4.06e-287	2.32e-285
LINC00998	8.49e-287	4.84e-285
BANF1	2.46e-284	1.4e-282
PARM1	2.97e-284	1.69e-282
TMEM119	6.16e-284	3.48e-282
SESN3	1.43e-283	8.04e-282
GAP43	1.72e-283	9.67e-282
DLEU1	3.93e-283	2.21e-281
RPL13A	1.52e-282	8.49e-281
LAYN	9.07e-281	5.06e-279
CLNS1A	1.73e-280	9.61e-279
PTRHD1	6.49e-280	3.6e-278
PEG10	7.6e-280	4.2e-278
AEBP1	8.83e-280	4.86e-278
HNRNPA1	3.47e-279	1.91e-277
CREB3L1	3.93e-279	2.15e-277
MYH10	7.05e-279	3.85e-277
H2AFY2	6.06e-278	3.3e-276
BAX	5.33e-277	2.9e-275
UBE2C	5.43e-277	2.94e-275
A1BG	3.46e-275	1.87e-273
PNRC1	6.72e-275	3.62e-273
CRISPLD1	9.11e-273	4.89e-271
CDCA4	2.66e-272	1.42e-270
SBDS	2.65e-271	1.42e-269
ELN	2.86e-271	1.52e-269
SYT6	8.03e-271	4.27e-269
MB	4.93e-269	2.61e-267
HSBP1	1.76e-267	9.28e-266
RPS8	4.73e-267	2.49e-265
SON	2.64e-266	1.39e-264
EVA1B	3.93e-266	2.06e-264
RAP1B	6.82e-266	3.56e-264
RCN1	8.84e-266	4.61e-264
MAMSTR	3.27e-265	1.7e-263
GAMT	3.47e-265	1.8e-263
GUCY1A3	5.1e-265	2.64e-263
HNRNPA1L2	5.32e-265	2.74e-263
CAPZA1	9.6e-265	4.94e-263
TCEB2	1.05e-264	5.37e-263
ISYNA1	5.25e-263	2.68e-261
SSR3	1.87e-261	9.56e-260
TPM4	7.49e-261	3.81e-259
ARL2	2.1e-260	1.07e-258
MALAT1	8.15e-260	4.12e-258
C7orf73	2.12e-258	1.07e-256
COPZ1	8.36e-258	4.21e-256
SEC61G	1.26e-256	6.31e-255
HAGHL	1.36e-256	6.8e-255
BNIP3	2.13e-256	1.06e-254
GTF2H5	3.09e-256	1.54e-254
HOXB6	5.43e-256	2.7e-254
BRK1	7.1e-256	3.52e-254
TNNI1	1.58e-255	7.81e-254
TOM1L1	4.21e-255	2.08e-253
OCIAD2	7.34e-255	3.61e-253
RP11-436D23.1	1.89e-254	9.27e-253
FAM229B	2.07e-254	1.01e-252
GUCY1B3	3.28e-254	1.6e-252
PPIC	3.28e-254	1.6e-252
RAB11A	7.26e-254	3.52e-252
LOX	1.25e-253	6.05e-252
SLC1A3	1.25e-253	6.06e-252
RPSA	3.53e-253	1.7e-251
UBE2E3	5.4e-253	2.59e-251
CDK1	2.44e-252	1.17e-250
TGFB1I1	4e-252	1.91e-250
IGF2BP3	1.01e-251	4.83e-250
RPS2	8.53e-250	4.06e-248
RPS16	2.27e-249	1.08e-247
BCAS4	3.01e-248	1.43e-246
LINC01139	4.71e-248	2.22e-246
HOXB7	5.69e-248	2.68e-246
RGS4	6.28e-248	2.95e-246
COL6A2	1.45e-247	6.82e-246
IL11RA	1.42e-246	6.64e-245
KDELR2	8.93e-246	4.17e-244
XXYLT1	9.09e-246	4.23e-244
MYL9	3.23e-245	1.5e-243
ZNF106	9.38e-245	4.34e-243
TMSB10	9.55e-245	4.41e-243
SKAP2	1.12e-244	5.15e-243
CRMP1	4.34e-244	2e-242
TTN	2.04e-243	9.35e-242
MYC	2.28e-243	1.04e-241
RPL22	7.98e-243	3.65e-241
SMS	8.47e-243	3.86e-241
TNNC1	2.11e-241	9.59e-240
HLA-C	2.63e-241	1.19e-239
HYAL2	4.53e-240	2.05e-238
TMEM167A	7.24e-239	3.27e-237
TMEM134	1.52e-238	6.84e-237
SEC11A	2.11e-238	9.47e-237
DNAJA1	2.66e-238	1.19e-236
RBFOX2	3.84e-238	1.72e-236
BIRC5	4.62e-238	2.06e-236
CIRBP	9.22e-238	4.1e-236
ADA	1.47e-237	6.54e-236
TMSB15A	2e-237	8.86e-236
CCT8	2.31e-237	1.02e-235
LYPD1	4.41e-237	1.94e-235
ING4	1.38e-236	6.07e-235
SUMO1	1.91e-236	8.37e-235
APLP1	1.04e-235	4.54e-234
SNCA	2.12e-235	9.28e-234
CA14	2.74e-235	1.2e-233
MEIS2	4.9e-235	2.13e-233
RPS24	1.85e-234	8.05e-233
RPS21	1.01e-233	4.36e-232
C14orf1	1.94e-233	8.37e-232
GLIPR2	3.09e-233	1.33e-231
CAPN6	3.33e-233	1.43e-231
SSNA1	5.96e-233	2.56e-231
MKI67	6.79e-233	2.91e-231
AFF3	6.98e-233	2.98e-231
UGT2B7	7.03e-233	3e-231
CCNB2	1.55e-232	6.57e-231
NONO	3.75e-232	1.59e-230
RABAC1	5.4e-232	2.29e-230
TMEM98	7.03e-232	2.97e-230
FZD2	1.33e-231	5.62e-230
CST3	2.08e-231	8.77e-230
RPL27	7.82e-231	3.28e-229
STARD4-AS1	1.25e-230	5.23e-229
PPP1R15A	2.86e-230	1.19e-228
SRP9	4.36e-230	1.82e-228
DPH5	5.6e-230	2.33e-228
TIMM13	6.74e-230	2.8e-228
MND1	1.41e-229	5.84e-228
CEBPB	1.51e-229	6.24e-228
PFN1	4.02e-229	1.66e-227
DNAH14	7.34e-229	3.02e-227
PWAR6	5.21e-228	2.14e-226
SMARCA1	6.2e-228	2.54e-226
ARPC2	6.44e-228	2.64e-226
RPS17	1.74e-227	7.12e-226
AP2M1	2.19e-227	8.92e-226
TP53I3	2.39e-227	9.71e-226
SCD	3.73e-227	1.51e-225
TOP2A	4.45e-227	1.8e-225
FJX1	2.07e-226	8.35e-225
TMUB1	6.72e-226	2.71e-224
LAD1	1.27e-225	5.12e-224
PRL	1.55e-225	6.24e-224
CCNG1	2.5e-225	1e-223
RPL31	3.35e-225	1.34e-223
CD63	5.32e-225	2.12e-223
PALM	1.99e-224	7.91e-223
P4HA2	2.1e-224	8.36e-223
CBX3	5.1e-224	2.02e-222
RASD1	6.91e-224	2.73e-222
LIX1	2.15e-223	8.5e-222
PDLIM2	3.11e-223	1.23e-221
FOS	4.58e-223	1.8e-221
BIN1	1.14e-222	4.47e-221
NDUFS8	1.29e-222	5.05e-221
PTPRD	3.47e-222	1.36e-220
SAT1	5.59e-222	2.18e-220
STK33	5.77e-222	2.25e-220
EIF3F	1.41e-220	5.46e-219
PRDM6	2.24e-220	8.68e-219
SERP1	3.45e-220	1.33e-218
METTL9	1.14e-219	4.42e-218
SULF2	1.44e-219	5.55e-218
FAM96A	4.99e-219	1.92e-217
ZFP36L2	9.66e-219	3.71e-217
HSPB1	1.06e-218	4.08e-217
EIF5	1.84e-218	7.05e-217
FDFT1	5.93e-218	2.26e-216
RBX1	2.03e-217	7.74e-216
ARMCX3	2.24e-217	8.5e-216
FAM114A1	2.47e-217	9.38e-216
SQLE	3.78e-217	1.43e-215
AURKB	4.93e-217	1.86e-215
CSRNP3	1.86e-216	7.02e-215
HMGA1	2.1e-216	7.9e-215
C1orf213	3.6e-216	1.35e-214
TMEM147	4.27e-216	1.6e-214
DNAJC12	4.57e-216	1.71e-214
C1orf86	9.64e-216	3.6e-214
DGUOK	1.42e-215	5.28e-214
IDH2	4.81e-215	1.79e-213
ITM2C	2.78e-214	1.03e-212
UNC119	1.1e-213	4.06e-212
PTGER2	1.71e-213	6.33e-212
SERTAD4-AS1	1.85e-213	6.83e-212
SPINT2	4.19e-213	1.54e-211
AHCY	1.13e-212	4.16e-211
RPS19	1.36e-212	5e-211
LSM5	1.4e-212	5.11e-211
PCAT6	1.67e-212	6.1e-211
RP11-798M19.6	2.07e-212	7.56e-211
CFL1	5.04e-212	1.84e-210
PCDH18	5.28e-212	1.92e-210
PCBP4	9.62e-212	3.49e-210
MCTS1	1.35e-211	4.88e-210
FBN2	3.23e-211	1.17e-209
NIPSNAP1	9.64e-211	3.48e-209
TMSB15B	1.46e-210	5.26e-209
HOXB8	9.44e-210	3.39e-208
COL6A1	1.01e-209	3.62e-208
KDM5B	2.02e-209	7.22e-208
TPX2	4.53e-209	1.62e-207
CCNI	5.1e-209	1.82e-207
ELL2	5.31e-209	1.89e-207
IGF2BP1	7.76e-209	2.76e-207
MRPL17	1.57e-208	5.57e-207
RSPO3	1.77e-207	6.26e-206
PLEKHO1	2.16e-207	7.63e-206
SRPK2	2.45e-207	8.65e-206
ANXA6	2.91e-207	1.02e-205
NDUFB5	7.6e-207	2.67e-205
RP11-736K20.5	1.07e-206	3.76e-205
C19orf53	1.9e-206	6.67e-205
PDE1C	2.28e-206	7.95e-205
ITSN1	6.66e-206	2.33e-204
MIR503HG	8.39e-206	2.92e-204
MRPS16	1.54e-205	5.35e-204
MID1	1.57e-205	5.47e-204
MRPS21	2.03e-205	7.03e-204
COA1	8.74e-205	3.02e-203
TIMP3	9.32e-205	3.22e-203
NT5DC2	1.4e-204	4.81e-203
LEPRE1	6.59e-204	2.27e-202
BNIP3L	8.22e-204	2.82e-202
LAPTM4B	9.69e-204	3.32e-202
ASPM	1.36e-203	4.65e-202
ANAPC13	1.37e-203	4.69e-202
COX6A2	1.79e-203	6.09e-202
FMN2	2.81e-203	9.55e-202
HMGN3	5.73e-203	1.95e-201
SNHG18	1.09e-202	3.7e-201
SEMA6D	1.23e-202	4.16e-201
TMEM261	1.24e-202	4.19e-201
MZT2B	3.53e-202	1.19e-200
S100A11	5.62e-202	1.89e-200
COL9A3	5.74e-202	1.93e-200
CEP170	2.14e-201	7.18e-200
SET	4.88e-201	1.64e-199
THBS2	9.99e-201	3.34e-199
SMDT1	3.07e-200	1.03e-198
IFI27L1	3.88e-200	1.29e-198
CYP1B1	6.84e-200	2.27e-198
PDE11A	1.04e-199	3.46e-198
RRM2	1.27e-199	4.21e-198
GPX1	1.41e-199	4.66e-198
KLHDC3	3.62e-199	1.2e-197
C20orf27	3.77e-199	1.24e-197
RPS25	5.21e-199	1.72e-197
NPC2	2.14e-198	7.03e-197
YBX1	2.9e-198	9.52e-197
DKK2	3.13e-198	1.02e-196
AKR1A1	4.19e-198	1.37e-196
DIAPH3	5.19e-198	1.69e-196
NPM1	6.71e-198	2.19e-196
KANK4	7.15e-198	2.33e-196
AKR1C2	7.18e-198	2.33e-196
C19orf48	1.17e-196	3.79e-195
PARK7	1.92e-196	6.23e-195
AK4	2.52e-196	8.16e-195
PPIB	6.86e-196	2.21e-194
PRDX5	7.52e-196	2.42e-194
ISOC2	1.05e-195	3.39e-194
EFNA4	1.18e-195	3.8e-194
GNG2	2.12e-195	6.8e-194
HIF3A	2.2e-195	7.03e-194
HNRNPC	6.09e-195	1.94e-193
ACTG1	8.36e-195	2.67e-193
LSM2	2.95e-194	9.39e-193
SNX6	3.46e-194	1.1e-192
ZIC2	4.45e-194	1.41e-192
CNPY4	2.05e-193	6.5e-192
EPHA3	4.62e-193	1.46e-191
LIMA1	5.98e-193	1.89e-191
ST6GALNAC5	1.44e-192	4.53e-191
RTN3	2.45e-192	7.71e-191
ENC1	4.69e-192	1.47e-190
NUTF2	1.24e-191	3.88e-190
SFRP2	1.34e-191	4.2e-190
GADD45GIP1	2.05e-191	6.4e-190
EYA1	3.34e-191	1.04e-189
CAPG	3.9e-191	1.22e-189
VIMP	4.57e-191	1.42e-189
PGD	4.99e-191	1.55e-189
DLGAP5	9.97e-191	3.09e-189
MRPL14	2.65e-190	8.22e-189
TMEM9	4.29e-190	1.33e-188
PRDX2	1.55e-189	4.77e-188
MDM1	2.85e-189	8.79e-188
CNN2	3.26e-189	1e-187
ZFAND6	3.7e-189	1.14e-187
CNTNAP2	6.21e-189	1.91e-187
KCNE4	1.07e-188	3.27e-187
RNF7	2.94e-188	8.99e-187
GSTP1	3.95e-188	1.21e-186
UBE2I	1.06e-187	3.24e-186
TCEAL3	1.14e-186	3.47e-185
NR4A1	1.48e-186	4.49e-185
SFXN1	4.56e-186	1.38e-184
HIST1H1E	4.67e-186	1.41e-184
STK19	5.38e-186	1.63e-184
PDGFC	7.21e-186	2.18e-184
MRPL51	1.14e-185	3.43e-184
CTD-2008L17.2	2.82e-185	8.5e-184
CFDP1	3.96e-185	1.19e-183
UBE2T	4.5e-185	1.35e-183
GSTA4	5.32e-185	1.59e-183
CASC15	1.07e-184	3.2e-183
GOLM1	1.69e-184	5.06e-183
CPE	2.47e-184	7.37e-183
NEXN	3.49e-184	1.04e-182
SETD5	3.52e-184	1.05e-182
RHNO1	3.55e-184	1.05e-182
MAP2K5	1.46e-183	4.31e-182
FAM127A	1.77e-183	5.24e-182
RPL29	2.36e-183	6.98e-182
TSPO	2.86e-183	8.43e-182
RHOB	6.29e-183	1.85e-181
FSD1	7.57e-183	2.23e-181
MYBPC1	9.63e-183	2.83e-181
NUSAP1	1.79e-182	5.24e-181
LDHB	2.9e-182	8.49e-181
CCDC23	4.12e-182	1.2e-180
LINC00960	7.11e-182	2.07e-180
SUMO2	9.03e-182	2.63e-180
POLR2E	1.1e-181	3.19e-180
MOXD1	1.78e-181	5.17e-180
MEIS3	3.85e-181	1.12e-179
C4orf3	1.25e-180	3.63e-179
SSR2	2.58e-180	7.46e-179
SKP2	3.19e-180	9.22e-179
LSAMP	3.22e-180	9.3e-179
CCDC90B	8.26e-180	2.38e-178
PHB	8.55e-180	2.46e-178
RPLP0	1.98e-179	5.69e-178
CBR4	2.09e-179	5.99e-178
FSIP2	4.25e-179	1.22e-177
DRAP1	5.81e-179	1.66e-177
RP11-456O19.2	6.62e-179	1.89e-177
ARPC3	7.91e-179	2.25e-177
EFEMP2	7.93e-179	2.26e-177
C12orf76	8.48e-179	2.41e-177
MANF	9.06e-179	2.57e-177
HSP90AA1	9.58e-179	2.71e-177
TGFB3	1.14e-178	3.24e-177
PBK	1.54e-178	4.36e-177
H3F3B	1.98e-178	5.58e-177
BAD	2.2e-178	6.2e-177
ITGAE	3.65e-178	1.03e-176
H2AFV	5.94e-178	1.67e-176
LINC00461	9.4e-178	2.64e-176
HOXA3	1.71e-177	4.79e-176
CXXC5	1.93e-177	5.41e-176
CDT1	3.67e-177	1.02e-175
CENPM	4.3e-177	1.2e-175
COPE	4.4e-177	1.22e-175
PPP1R14A	4.51e-177	1.25e-175
APOPT1	5.18e-177	1.44e-175
SWI5	1.82e-176	5.05e-175
MAP2	2.04e-176	5.64e-175
OAZ2	3.24e-176	8.95e-175
DDX17	5.69e-176	1.57e-174
TBCA	6.03e-176	1.66e-174
C1QTNF3	1.14e-175	3.13e-174
ANKRD50	3.89e-175	1.07e-173
POSTN	4.17e-175	1.14e-173
LINC00632	7.82e-175	2.14e-173
ATPIF1	8.56e-175	2.34e-173
NPDC1	1.56e-174	4.26e-173
AC018647.3	2.34e-174	6.38e-173
FHL3	2.44e-174	6.64e-173
TM4SF1	4.04e-174	1.1e-172
SMCO4	4.73e-174	1.28e-172
TCF3	5.06e-174	1.37e-172
FAM64A	5.75e-174	1.56e-172
DGCR6L	6.04e-174	1.63e-172
SDC3	9.56e-174	2.58e-172
POLR1D	1.55e-173	4.18e-172
RBBP4	6.14e-173	1.65e-171
MT-ND4	6.71e-173	1.81e-171
PTPRZ1	7.51e-173	2.02e-171
MLEC	1.21e-172	3.25e-171
GPR98	1.21e-172	3.25e-171
COTL1	5.75e-172	1.54e-170
EIF3E	1.03e-171	2.76e-170
NARF	2.63e-171	7.01e-170
NCAPG	3.67e-171	9.76e-170
VPS25	3.92e-171	1.04e-169
MEX3A	5.18e-171	1.38e-169
AP1S2	1.56e-170	4.14e-169
NAT14	6.32e-170	1.67e-168
EIF4E2	6.71e-170	1.78e-168
NEDD8	1.32e-169	3.5e-168
TSPAN5	2.61e-169	6.88e-168
TRIM63	3.43e-169	9.04e-168
HMG20B	4.89e-169	1.29e-167
RUNX1T1	5.77e-169	1.51e-167
TAGLN3	7.32e-169	1.92e-167
SERTAD1	1.25e-168	3.27e-167
NDC80	1.44e-168	3.76e-167
FIBP	1.91e-168	4.99e-167
CD151	2.13e-168	5.55e-167
ATP5A1	4.1e-168	1.07e-166
ERP29	4.79e-168	1.25e-166
CMYA5	7.92e-168	2.06e-166
RPS6	1.1e-167	2.84e-166
CLU	1.22e-167	3.17e-166
CCNA2	1.35e-167	3.48e-166
AHNAK2	6.86e-167	1.77e-165
LDHA	7.71e-167	1.99e-165
NBEAL1	8.75e-167	2.26e-165
SULT1C4	1.77e-166	4.54e-165
TMEM141	1.98e-166	5.1e-165
JAKMIP2	2.88e-166	7.4e-165
CDC25B	6.46e-166	1.66e-164
SLC39A7	1.28e-165	3.28e-164
CDKN1C	1.65e-165	4.21e-164
RP11-345J4.5	1.98e-165	5.05e-164
DEAF1	2.32e-165	5.91e-164
CTNNBIP1	2.8e-165	7.12e-164
EGFL7	3.01e-165	7.66e-164
HOXB9	4.38e-165	1.11e-163
TUBG1	5.93e-165	1.5e-163
SMOC2	2.37e-164	6.01e-163
RPS10	2.68e-164	6.78e-163
CALML6	3.11e-164	7.85e-163
LPHN2	8.68e-164	2.19e-162
CUTA	1.04e-163	2.63e-162
MELK	1.05e-163	2.65e-162
LAGE3	1.76e-163	4.43e-162
ZBTB16	1.85e-163	4.63e-162
CCNB1IP1	1.9e-163	4.77e-162
VAT1	2.26e-163	5.66e-162
NDUFA4	6.63e-163	1.66e-161
ZNF444	5.97e-162	1.49e-160
CNPY3	6.95e-162	1.73e-160
CCND3	8.19e-162	2.04e-160
RAMP1	1.05e-161	2.62e-160
AKR7A2	1.18e-161	2.92e-160
SCOC	1.25e-161	3.11e-160
PSMB2	1.45e-161	3.6e-160
CASC5	1.64e-161	4.07e-160
RPS7	6.24e-161	1.54e-159
ATP5G2	8.9e-161	2.2e-159
REEP2	1.14e-160	2.81e-159
PAK3	1.26e-160	3.1e-159
SLC35E2B	2.46e-160	6.06e-159
ATP1B2	2.59e-160	6.36e-159
TET1	3.17e-160	7.78e-159
UBE2H	4.07e-160	9.97e-159
DYNLRB1	5.95e-160	1.46e-158
CD276	6.66e-160	1.63e-158
LIMD2	7.3e-160	1.78e-158
HSPA1B	8.5e-160	2.07e-158
AFAP1	1.64e-159	3.99e-158
EHD2	1.76e-159	4.27e-158
RGS3	2.46e-159	5.97e-158
FKBP3	5.57e-159	1.35e-157
EXTL2	1.44e-158	3.49e-157
RP11-125B21.2	2.28e-158	5.51e-157
CTXN1	3.13e-158	7.56e-157
NXPH4	5.54e-158	1.34e-156
FAM115A	9.18e-158	2.21e-156
LINC00665	9.69e-158	2.33e-156
RPL4	1.31e-157	3.15e-156
CDK14	1.39e-157	3.34e-156
LOXL2	2.16e-157	5.19e-156
CLPP	4.7e-157	1.12e-155
ANP32B	1.14e-156	2.72e-155
CENPF	1.3e-156	3.1e-155
GNB4	3.22e-156	7.69e-155
TTYH3	3.34e-156	7.97e-155
RHOC	3.55e-156	8.43e-155
DAD1	3.55e-156	8.43e-155
RPS12	3.58e-156	8.49e-155
PABPN1	9.67e-156	2.29e-154
TRDN	1.09e-155	2.58e-154
TMEM161B-AS1	2.42e-155	5.73e-154
ZWINT	2.97e-155	7.02e-154
MAFF	3.9e-155	9.2e-154
SMC6	4.53e-155	1.07e-153
RERG	5.24e-155	1.23e-153
CKAP2	9.27e-155	2.18e-153
FXR1	9.4e-155	2.21e-153
SGCD	1.07e-154	2.5e-153
STMN1	1.09e-154	2.55e-153
S100A1	1.31e-154	3.07e-153
TMEM183A	2.17e-154	5.08e-153
CERCAM	4.61e-154	1.08e-152
LAPTM4A	4.84e-154	1.13e-152
CRB2	5.14e-154	1.2e-152
RPL32	5.36e-154	1.25e-152
LGI2	7.03e-154	1.63e-152
SSU72	1.36e-153	3.17e-152
DEPDC1	3.73e-153	8.64e-152
C11orf74	5.85e-153	1.35e-151
ITGB1	9.23e-153	2.13e-151
SUPT20H	1.32e-152	3.04e-151
PRRT2	1.33e-152	3.07e-151
LMNA	1.8e-152	4.15e-151
MRPL28	2.26e-152	5.2e-151
PRDX3	3.65e-152	8.38e-151
CADM4	4.13e-152	9.48e-151
DNPH1	4.33e-152	9.93e-151
TCF12	4.93e-152	1.13e-150
REEP3	1.52e-151	3.48e-150
CENPA	3.54e-151	8.08e-150
SHMT2	4.13e-151	9.42e-150
CFL2	5.73e-151	1.31e-149
WHSC1	7.37e-151	1.68e-149
NDUFB11	8.25e-151	1.87e-149
PRMT2	9.55e-151	2.17e-149
CTD-2015H6.3	1.29e-150	2.92e-149
CASC9	2.07e-150	4.7e-149
MYOG	2.77e-150	6.26e-149
TMEM14C	3.07e-150	6.94e-149
TSPAN13	4.29e-150	9.69e-149
CKAP2L	7.08e-150	1.59e-148
CETN2	1.05e-149	2.37e-148
ARPC5	1.06e-149	2.38e-148
EZR	1.82e-149	4.08e-148
RPL22L1	1.92e-149	4.31e-148
DDX21	2.94e-149	6.59e-148
PARP1	3.17e-149	7.09e-148
BEX4	4.91e-149	1.1e-147
hsa-mir-8072	5.11e-149	1.14e-147
MYEF2	5.57e-149	1.24e-147
SAC3D1	6.55e-149	1.46e-147
C14orf119	7.86e-149	1.75e-147
HOTAIRM1	1.24e-148	2.75e-147
PHF6	1.61e-148	3.57e-147
EEF1B2	2.76e-148	6.13e-147
ATP6V0E1	5.74e-148	1.27e-146
FKBP14	7.34e-148	1.62e-146
ZNF706	7.85e-148	1.73e-146
SYTL3	8.48e-148	1.87e-146
TXLNB	8.53e-148	1.88e-146
LEF1	1.88e-147	4.14e-146
DPY30	2.06e-147	4.54e-146
HMGA2	2.18e-147	4.8e-146
BTG1	2.48e-147	5.45e-146
BET1	2.74e-147	6.01e-146
NPM3	4.55e-147	9.96e-146
PHYHIPL	4.65e-147	1.02e-145
ZDHHC12	5.61e-147	1.23e-145
KATNBL1	6.08e-147	1.33e-145
ENO3	1.11e-146	2.43e-145
IFT20	1.66e-146	3.62e-145
PIN1	2.32e-146	5.05e-145
G6PC3	2.83e-146	6.16e-145
TKT	3.83e-146	8.32e-145
MRP63	7.97e-146	1.73e-144
RHOD	9.08e-146	1.97e-144
MIF	1.27e-145	2.74e-144
CDH11	1.51e-145	3.27e-144
HES6	2.03e-145	4.37e-144
CHCHD1	3.35e-145	7.23e-144
THAP8	3.99e-145	8.6e-144
STC2	5.63e-145	1.21e-143
ADD3	1.83e-144	3.92e-143
EFHC1	5.11e-144	1.1e-142
TRMT112	6.39e-144	1.37e-142
RDX	7.41e-144	1.59e-142
PDGFRB	7.78e-144	1.66e-142
FAM107A	8.49e-144	1.81e-142
YIPF3	9.27e-144	1.98e-142
APBA2	2.4e-143	5.12e-142
GPC2	2.52e-143	5.37e-142
LOXL1-AS1	3.09e-143	6.58e-142
CENPK	4.35e-143	9.23e-142
CDK16	8e-143	1.7e-141
LYRM4	1.26e-142	2.66e-141
PPFIA3	1.52e-142	3.23e-141
RUFY3	1.93e-142	4.07e-141
LTA4H	1.94e-142	4.1e-141
MAD2L2	3.31e-142	6.99e-141
PBX1	4.36e-142	9.19e-141
PRSS35	6.25e-142	1.32e-140
MRPS33	7.15e-142	1.5e-140
GXYLT2	8.34e-142	1.75e-140
RPS3A	1.61e-141	3.37e-140
COX5A	3.09e-141	6.49e-140
MYO10	3.21e-141	6.73e-140
MAGEH1	3.96e-141	8.28e-140
ABI2	4.55e-141	9.5e-140
HSP90B1	5.23e-141	1.09e-139
UQCR11.1	6.85e-141	1.43e-139
LINC00649	1.16e-140	2.41e-139
EFNA3	1.48e-140	3.08e-139
TXNL4A	1.87e-140	3.89e-139
INPP4B	1.88e-140	3.9e-139
HHLA3	2.21e-140	4.59e-139
C16orf87	2.33e-140	4.83e-139
GPX4	2.45e-140	5.07e-139
TCEA1	2.6e-140	5.37e-139
ECHS1	4.92e-140	1.02e-138
2021-09-02	7.74e-140	1.6e-138
LUC7L3	2.5e-139	5.15e-138
TMEM59L	2.74e-139	5.64e-138
DCX	3.51e-139	7.23e-138
ARL16	3.87e-139	7.95e-138
PGK1	4.04e-139	8.28e-138
PSPH	4.44e-139	9.1e-138
GMDS	8.68e-139	1.78e-137
DTWD1	1.42e-138	2.91e-137
POLR2G	1.56e-138	3.19e-137
ARHGAP11A	2.92e-138	5.95e-137
RAMP2	3.28e-138	6.69e-137
SOSTDC1	3.83e-138	7.8e-137
EI24	8.62e-138	1.75e-136
PSMA4	1.25e-137	2.55e-136
NBPF10	1.42e-137	2.89e-136
CDKN3	1.49e-137	3.01e-136
IRF1	1.81e-137	3.67e-136
ADAMTS6	2.79e-137	5.65e-136
F2R	3.08e-137	6.23e-136
DTYMK	3.78e-137	7.64e-136
FZD3	6.39e-137	1.29e-135
C1orf61	7.74e-137	1.56e-135
NDRG2	2.38e-136	4.78e-135
EYA2	2.72e-136	5.46e-135
MRPS14	3.35e-136	6.73e-135
KIFC1	3.92e-136	7.87e-135
EEF2	4.9e-136	9.82e-135
NTAN1	6.79e-136	1.36e-134
SPG21	7.1e-136	1.42e-134
SH3BGRL	8.16e-136	1.63e-134
CDCA3	8.38e-136	1.67e-134
CHID1	9.07e-136	1.81e-134
COX5B	9.63e-136	1.92e-134
HSPD1	9.89e-136	1.97e-134
PEBP4	1.02e-135	2.04e-134
TMEM101	1.65e-135	3.27e-134
NHLRC3	4.55e-135	9.03e-134
UQCRQ	7.58e-135	1.5e-133
FGF7	8.43e-135	1.67e-133
C8orf59	8.76e-135	1.73e-133
PCDH7	1.12e-134	2.22e-133
CENPU	1.37e-134	2.71e-133
DDT	1.38e-134	2.72e-133
FKBP2	1.48e-134	2.92e-133
COL4A5	1.64e-134	3.23e-133
UROS	3.13e-134	6.15e-133
KIF11	5.39e-134	1.06e-132
PHLDB2	9.73e-134	1.91e-132
RP11-171N4.1	1.44e-133	2.81e-132
RMI2	1.69e-133	3.32e-132
LPHN3	5.31e-133	1.04e-131
TSPAN6	6.93e-133	1.35e-131
FAM162A	7.86e-133	1.54e-131
ISLR	7.94e-133	1.55e-131
MAML2	8.15e-133	1.59e-131
TIMP1	1.09e-132	2.12e-131
PNISR	1.35e-132	2.63e-131
PPP4C	1.46e-132	2.84e-131
UBA6	2.19e-132	4.26e-131
CBX5	3.16e-132	6.13e-131
GPR56	3.98e-132	7.71e-131
FKBP1B	4.07e-132	7.87e-131
TMEM256	4.49e-132	8.68e-131
ACP1	5.15e-132	9.95e-131
PRR4	6.58e-132	1.27e-130
RAD51AP1	1.88e-131	3.63e-130
BCKDK	3.1e-131	5.97e-130
CACNB3	3.58e-131	6.89e-130
PSMC1	7.77e-131	1.49e-129
DPYSL4	9.02e-131	1.73e-129
RP11-380D23.1	1.64e-130	3.15e-129
ZCRB1	1.71e-130	3.28e-129
SPATS2	1.77e-130	3.38e-129
PHF14	2.17e-130	4.15e-129
HOXA2	2.39e-130	4.56e-129
MXD3	2.72e-130	5.19e-129
GNPDA1	2.87e-130	5.47e-129
TIMM8B	2.96e-130	5.63e-129
TRIM27	3.09e-130	5.88e-129
SH3PXD2A	3.81e-130	7.25e-129
AURKAIP1	3.99e-130	7.58e-129
IGSF10	4.83e-130	9.15e-129
HOXB5	5.37e-130	1.02e-128
NUF2	5.54e-130	1.05e-128
AIDA	6.54e-130	1.24e-128
ZIC4	6.88e-130	1.3e-128
EIF4A1	7.2e-130	1.36e-128
FKBP8	1.16e-129	2.19e-128
CDH6	1.41e-129	2.65e-128
ARL6IP5	1.85e-129	3.48e-128
MRPS26	3.59e-129	6.75e-128
FARP1	3.77e-129	7.08e-128
GLT8D1	4.36e-129	8.18e-128
ANLN	6.07e-129	1.14e-127
PRKAG1	7.14e-129	1.34e-127
MCUR1	1.06e-128	1.98e-127
TMEM50A	1.15e-128	2.15e-127
ATAT1	1.24e-128	2.31e-127
CDH7	1.98e-128	3.69e-127
ZNF423	2.32e-128	4.32e-127
ANP32A	2.86e-128	5.32e-127
ZEB1	2.98e-128	5.54e-127
EML4	3.07e-128	5.7e-127
SYT1	4.28e-128	7.95e-127
STARD4	5.98e-128	1.11e-126
CHST2	7.09e-128	1.31e-126
SDHC	7.19e-128	1.33e-126
GTF3A	7.8e-128	1.44e-126
DPM2	1.04e-127	1.92e-126
SH3GL1	1.04e-127	1.92e-126
SAT2	1.65e-127	3.03e-126
USMG5	1.72e-127	3.17e-126
TDO2	2.32e-127	4.27e-126
GUK1	3.55e-127	6.53e-126
C11orf83	3.57e-127	6.56e-126
C11orf73	4.14e-127	7.6e-126
SC5D	4.2e-127	7.7e-126
DLL3	9.57e-127	1.75e-125
CMIP	1.02e-126	1.87e-125
CSDC2	1.21e-126	2.2e-125
PFDN4	1.33e-126	2.43e-125
FBXO17	1.34e-126	2.45e-125
PHF23	1.88e-126	3.43e-125
MRPL12	1.89e-126	3.45e-125
FKBP11	2.33e-126	4.23e-125
POLR2J	2.59e-126	4.7e-125
PDZD11	2.74e-126	4.98e-125
KIF4A	2.95e-126	5.36e-125
FKBP5	4.98e-126	9.02e-125
SGOL1	5.66e-126	1.03e-124
GJA1	5.7e-126	1.03e-124
TTK	6.14e-126	1.11e-124
BUB1B	8.02e-126	1.45e-124
PRAF2	1.14e-125	2.05e-124
BBOX1	1.54e-125	2.77e-124
TCEAL4	1.8e-125	3.24e-124
POLR2J3	1.88e-125	3.39e-124
RPS15A	3.37e-125	6.05e-124
SNX3	3.74e-125	6.71e-124
PLAG1	4.37e-125	7.84e-124
SP5	4.7e-125	8.43e-124
RP5-1024C24.1	5.88e-125	1.05e-123
ENO2	7.4e-125	1.32e-123
DDOST	8.32e-125	1.49e-123
ZNF793	9.31e-125	1.66e-123
PSIP1	1.02e-124	1.82e-123
TBL1XR1	1.6e-124	2.86e-123
ITFG3	1.72e-124	3.07e-123
LINC00685	2.4e-124	4.27e-123
TMEM160	3.31e-124	5.89e-123
RP11-486G15.2	3.37e-124	5.98e-123
OXA1L	3.43e-124	6.09e-123
CHPF	3.53e-124	6.26e-123
RPL26L1	4.45e-124	7.88e-123
FAM192A	5.43e-124	9.61e-123
CUEDC2	7.02e-124	1.24e-122
HOMER2	9.89e-124	1.75e-122
GOLIM4	1.19e-123	2.1e-122
LSM7	1.29e-123	2.27e-122
BLCAP	2.82e-123	4.97e-122
ZMAT3	3.17e-123	5.57e-122
CDK5	3.62e-123	6.37e-122
SOGA2	4.62e-123	8.12e-122
HJURP	6.4e-123	1.12e-121
SCG5	6.89e-123	1.21e-121
PTPRS	8.36e-123	1.46e-121
N4BP2L2	8.96e-123	1.57e-121
ERH	1.54e-122	2.69e-121
ZNF608	1.6e-122	2.79e-121
AK1	1.61e-122	2.81e-121
CDON	1.67e-122	2.9e-121
CASC10	3.04e-122	5.3e-121
SLC22A17	3.13e-122	5.45e-121
SNAPIN	3.6e-122	6.27e-121
HDAC2	3.76e-122	6.52e-121
PCDHB2	4.24e-122	7.36e-121
PCAT7	4.45e-122	7.72e-121
TPM1	5.59e-122	9.68e-121
GDI2	6.3e-122	1.09e-120
AL592284.1	7.83e-122	1.35e-120
MACF1	8.63e-122	1.49e-120
ZIC3	8.9e-122	1.54e-120
PCBD1	1.08e-121	1.86e-120
PLP1	1.11e-121	1.91e-120
TRIM16	1.44e-121	2.48e-120
WHSC1L1	2.98e-121	5.13e-120
CTD-2298J14.2	3.12e-121	5.35e-120
SND1	5.98e-121	1.03e-119
ZNF462	5.99e-121	1.03e-119
OLA1	6.78e-121	1.16e-119
ZNF226	7.82e-121	1.34e-119
DPCD	7.97e-121	1.36e-119
AGPAT1	1.07e-120	1.83e-119
DDR2	1.25e-120	2.13e-119
TCTEX1D2	1.57e-120	2.68e-119
PCDHA12	1.88e-120	3.2e-119
RALY	2.06e-120	3.5e-119
TADA3	2.6e-120	4.43e-119
SCARB2	4.1e-120	6.97e-119
SNHG8	5.54e-120	9.41e-119
C11orf31	6.3e-120	1.07e-118
TEAD2	7.27e-120	1.23e-118
CDKN1B	9.37e-120	1.59e-118
KIF15	1.46e-119	2.48e-118
CLIP3	1.86e-119	3.14e-118
SSBP2	2.38e-119	4.02e-118
HIST1H2BD	2.4e-119	4.05e-118
HOXB-AS3	2.61e-119	4.41e-118
GAL3ST3	4.23e-119	7.13e-118
EIF2AK1	5.93e-119	9.98e-118
MPG	6.33e-119	1.07e-117
HMGB1	6.69e-119	1.12e-117
WASF1	7.06e-119	1.19e-117
CBY1	9.64e-119	1.62e-117
KIF2C	9.96e-119	1.67e-117
MTMR11	1.41e-118	2.37e-117
GGCT	1.59e-118	2.67e-117
IL32	1.67e-118	2.8e-117
PAIP2	2.44e-118	4.08e-117
LINC00478	2.97e-118	4.96e-117
DACH1	3.35e-118	5.58e-117
TK1	3.39e-118	5.66e-117
GNB2L1	4.32e-118	7.19e-117
ARL4C	4.71e-118	7.84e-117
COL16A1	5.63e-118	9.36e-117
NRK	5.8e-118	9.62e-117
GDPD2	6.76e-118	1.12e-116
IDH1	1.06e-117	1.76e-116
CAV3	2.42e-117	4e-116
DCTN2	2.66e-117	4.39e-116
GGH	2.73e-117	4.51e-116
EDNRA	2.93e-117	4.83e-116
CDK10	2.98e-117	4.93e-116
UBE2L3	3.63e-117	5.99e-116
UQCRH	4.09e-117	6.74e-116
HRH1	5.09e-117	8.39e-116
FGF11	5.34e-117	8.79e-116
CCNL1	5.66e-117	9.3e-116
CHRND	5.69e-117	9.34e-116
MYBL2	5.98e-117	9.81e-116
MME	6.39e-117	1.05e-115
ATRAID	6.57e-117	1.08e-115
FEZ1	6.61e-117	1.08e-115
TMEM219	8.21e-117	1.34e-115
C16orf59	8.77e-117	1.43e-115
TACC3	1.29e-116	2.11e-115
USO1	1.91e-116	3.12e-115
GNB2	2e-116	3.26e-115
LDOC1	2.18e-116	3.54e-115
COX6B1	2.43e-116	3.96e-115
HSPA2	3.14e-116	5.1e-115
LRRIQ1	5.16e-116	8.38e-115
TPT1	5.73e-116	9.29e-115
DZIP3	7.11e-116	1.15e-114
COX8A	9.54e-116	1.55e-114
CDCA5	1.22e-115	1.98e-114
CCDC106	1.69e-115	2.73e-114
FYN	1.84e-115	2.97e-114
CMTM3	2.13e-115	3.45e-114
SEC61B	2.71e-115	4.37e-114
CYBA	2.99e-115	4.82e-114
BAALC	4.21e-115	6.78e-114
MAP3K13	4.22e-115	6.8e-114
ID2	4.35e-115	6.99e-114
ARPP21	4.55e-115	7.31e-114
MRPL34	6.3e-115	1.01e-113
ERGIC3	6.39e-115	1.03e-113
PDAP1	7.15e-115	1.15e-113
THYN1	1.12e-114	1.79e-113
GRN	1.14e-114	1.83e-113
FAHD2A	1.41e-114	2.26e-113
ATF7IP2	1.73e-114	2.77e-113
CEP55	1.92e-114	3.06e-113
MORF4L2	2.18e-114	3.47e-113
NBPF1	2.38e-114	3.8e-113
PTOV1	2.96e-114	4.7e-113
UBE2E2	3e-114	4.77e-113
YIF1B	3.3e-114	5.24e-113
CDC42EP4	3.81e-114	6.05e-113
CRELD1	3.86e-114	6.12e-113
C14orf166	6.91e-114	1.1e-112
RP11-22P6.3	7.19e-114	1.14e-112
NEB	9.79e-114	1.55e-112
RP11-439A17.7	1.24e-113	1.95e-112
VTI1B	1.35e-113	2.14e-112
ARSI	1.59e-113	2.51e-112
ART3	1.95e-113	3.07e-112
RIMS2	2.41e-113	3.79e-112
CRIPT	2.47e-113	3.89e-112
SRGAP3	3e-113	4.72e-112
NUPR1	4.12e-113	6.48e-112
CASC8	5.04e-113	7.92e-112
CRABP1	5.44e-113	8.53e-112
PTPLAD1	5.64e-113	8.84e-112
CDC25C	5.79e-113	9.07e-112
SOX12	6.02e-113	9.43e-112
DAP3	6.28e-113	9.83e-112
IMPDH2	8e-113	1.25e-111
CNPY2	1.09e-112	1.7e-111
ZNF738	1.54e-112	2.4e-111
NKD1	1.96e-112	3.06e-111
RPS17L	2.17e-112	3.38e-111
SERPINE2	4.53e-112	7.06e-111
C1orf192	5.26e-112	8.18e-111
SNCAIP	5.49e-112	8.54e-111
AGGF1	6.53e-112	1.01e-110
AGTRAP	8.13e-112	1.26e-110
LSM10	1.12e-111	1.74e-110
CSRP3	1.2e-111	1.86e-110
SH3KBP1	1.59e-111	2.45e-110
IKBKG	1.6e-111	2.47e-110
FAU	1.78e-111	2.74e-110
SDCBP	2.24e-111	3.46e-110
TMEM42	3.92e-111	6.05e-110
MEAF6	4.18e-111	6.45e-110
GPT2	5.22e-111	8.04e-110
ARF1	5.8e-111	8.92e-110
TMPO	7.07e-111	1.09e-109
RASL11B	7.57e-111	1.16e-109
TSEN34	7.62e-111	1.17e-109
MLST8	8.3e-111	1.27e-109
SDC1	9.69e-111	1.49e-109
DNMT1	1.07e-110	1.64e-109
ZNF415	1.19e-110	1.82e-109
NUBP2	1.19e-110	1.82e-109
KIF23	1.2e-110	1.83e-109
ATP8A2	1.27e-110	1.94e-109
FAT1	1.31e-110	1.99e-109
LYPLA2	1.33e-110	2.02e-109
DNMT3A	1.4e-110	2.13e-109
JAM3	2e-110	3.04e-109
MVB12A	2.33e-110	3.54e-109
TCEA2	2.38e-110	3.61e-109
NDN	2.85e-110	4.32e-109
SMOC1	3.01e-110	4.57e-109
PLD5	3.4e-110	5.15e-109
CDC42	3.87e-110	5.86e-109
RGL1	4.1e-110	6.2e-109
LDB2	4.41e-110	6.67e-109
ISG15	8.18e-110	1.24e-108
SMIM20	1.25e-109	1.89e-108
GPX3	1.27e-109	1.91e-108
ACTN2	1.37e-109	2.06e-108
CBX2	1.41e-109	2.12e-108
FOXM1	1.47e-109	2.21e-108
AXL	1.51e-109	2.27e-108
SSX2IP	2.05e-109	3.08e-108
SPAG16	2.33e-109	3.51e-108
NME5	2.77e-109	4.16e-108
SLIT2	3.27e-109	4.91e-108
CBX6	3.47e-109	5.2e-108
MAFB	3.48e-109	5.21e-108
RPL6	4.54e-109	6.79e-108
NDUFV3	4.58e-109	6.85e-108
ISCA2	5.4e-109	8.07e-108
CSRP2	5.91e-109	8.82e-108
NDUFB3	6.39e-109	9.54e-108
GNG5	1.09e-108	1.62e-107
NEK2	1.11e-108	1.65e-107
KHDC1	1.12e-108	1.67e-107
CDKN1A	1.25e-108	1.86e-107
CTTN	1.43e-108	2.12e-107
TIMM17B	1.93e-108	2.86e-107
ILK	2.24e-108	3.32e-107
ZKSCAN1	2.34e-108	3.47e-107
SLC2A3	3.28e-108	4.85e-107
CA9	3.76e-108	5.57e-107
RP1-302G2.5	4.37e-108	6.46e-107
LOXL3	6.17e-108	9.12e-107
SMARCE1	7.68e-108	1.13e-106
USP18	9.28e-108	1.37e-106
MAP3K7CL	2.57e-107	3.78e-106
NFIB	2.68e-107	3.95e-106
MIR210HG	2.7e-107	3.98e-106
CISD2	2.94e-107	4.32e-106
CAMTA1	3.18e-107	4.68e-106
RPS28	3.36e-107	4.93e-106
C5orf49	3.5e-107	5.14e-106
COX7A2L	3.88e-107	5.69e-106
YWHAH	4.73e-107	6.93e-106
IER2	5.51e-107	8.08e-106
RPS27L	5.69e-107	8.33e-106
TXNL1	6.99e-107	1.02e-105
RP11-276H19.2	8.47e-107	1.24e-105
ZNF292	9.33e-107	1.36e-105
LRRC3B	9.34e-107	1.36e-105
CDC20	1.09e-106	1.59e-105
S100A16	1.4e-106	2.04e-105
LARS	1.8e-106	2.61e-105
PRICKLE1	2.19e-106	3.19e-105
COX7A1	2.31e-106	3.36e-105
VDAC2	2.47e-106	3.59e-105
MED28	2.74e-106	3.98e-105
PIGF	2.94e-106	4.26e-105
MAPK10	3.06e-106	4.44e-105
PTGES3	3.32e-106	4.8e-105
DDAH2	3.7e-106	5.35e-105
DKK3	3.83e-106	5.53e-105
HIST1H1B	4.52e-106	6.52e-105
APP	6.87e-106	9.91e-105
NUDCD2	8.86e-106	1.28e-104
ANXA2	9.28e-106	1.34e-104
PTMA	9.35e-106	1.35e-104
DAPL1	1.2e-105	1.73e-104
AC002456.2	1.22e-105	1.76e-104
SLC50A1	1.32e-105	1.9e-104
BRWD1	1.42e-105	2.04e-104
NNT-AS1	1.57e-105	2.26e-104
LSMD1	1.67e-105	2.4e-104
POLR3GL	1.82e-105	2.61e-104
PBX3	1.86e-105	2.67e-104
MYBPC2	1.89e-105	2.71e-104
UBAC2	2.49e-105	3.56e-104
ZNF521	3.06e-105	4.38e-104
FAT3	3.46e-105	4.95e-104
SLC7A7	3.53e-105	5.03e-104
BCAR1	3.64e-105	5.18e-104
C3orf67	3.65e-105	5.2e-104
CDK4	3.92e-105	5.57e-104
TMEM230	3.92e-105	5.57e-104
ROBO1	4.64e-105	6.6e-104
LPAR6	5.45e-105	7.74e-104
RAB34	7.14e-105	1.01e-103
SEC31A	1.04e-104	1.47e-103
MTIF3	1.14e-104	1.62e-103
MT-CO1	1.78e-104	2.53e-103
PPP2R1A	1.87e-104	2.64e-103
GAS2	3.19e-104	4.51e-103
MEIS1	3.25e-104	4.6e-103
ANKRD36	5e-104	7.07e-103
AC098973.2	6.88e-104	9.71e-103
CINP	9.15e-104	1.29e-102
GPR137	9.91e-104	1.4e-102
UBE2V2	1.08e-103	1.52e-102
GPM6A	1.1e-103	1.54e-102
RPL14	1.11e-103	1.56e-102
GLCCI1	1.2e-103	1.68e-102
RPL37	2.29e-103	3.21e-102
KLHDC2	4.36e-103	6.12e-102
ITGB3BP	4.65e-103	6.52e-102
CDCA2	5.23e-103	7.32e-102
ABRACL	5.39e-103	7.54e-102
HIST1H2AM	6.15e-103	8.59e-102
PTPRO	7.09e-103	9.9e-102
DMD	8.21e-103	1.15e-101
FAM89B	9.57e-103	1.34e-101
PMM1	1.01e-102	1.41e-101
EIF2AK4	1.38e-102	1.92e-101
PDHB	1.52e-102	2.11e-101
SCRN1	1.73e-102	2.41e-101
PLK1	1.89e-102	2.63e-101
CLTA	2.68e-102	3.72e-101
RP11-1L12.3	2.68e-102	3.72e-101
LINC00320	4e-102	5.54e-101
ECH1	5.27e-102	7.31e-101
THAP3	5.51e-102	7.63e-101
SMARCC1	7.65e-102	1.06e-100
C12orf73	8.34e-102	1.15e-100
TRIM73	8.39e-102	1.16e-100
PCP4	1.08e-101	1.49e-100
ACAA2	1.09e-101	1.5e-100
ATF3	1.75e-101	2.41e-100
SAMD14	1.83e-101	2.52e-100
RARRES2	1.87e-101	2.57e-100
ADAMTS3	1.88e-101	2.58e-100
EBPL	2.94e-101	4.04e-100
UFC1	3.33e-101	4.57e-100
ASPN	3.8e-101	5.22e-100
ORC6	4.42e-101	6.06e-100
LINC01088	4.79e-101	6.56e-100
TRAF7	4.97e-101	6.81e-100
CHCHD5	5.97e-101	8.18e-100
OXLD1	8.36e-101	1.14e-99
RPL36AL	8.57e-101	1.17e-99
PGRMC1	1.2e-100	1.64e-99
PNKD	1.54e-100	2.1e-99
N4BP2	1.74e-100	2.37e-99
MORC4	1.79e-100	2.44e-99
ZNF714	2.31e-100	3.15e-99
ATRX	2.34e-100	3.18e-99
COX7A2	3.08e-100	4.2e-99
GPC4	3.93e-100	5.34e-99
PSMG3	4.8e-100	6.53e-99
PDLIM3	5.04e-100	6.84e-99
PRKDC	5.62e-100	7.62e-99
VPS35	6.45e-100	8.74e-99
RPL37A	6.67e-100	9.04e-99
AASDHPPT	7.22e-100	9.78e-99
RAB6A	1.03e-99	1.39e-98
NDUFA2	1.82e-99	2.46e-98
XIRP2	2.49e-99	3.36e-98
ALPK2	2.65e-99	3.58e-98
CYYR1	2.98e-99	4.02e-98
ACTA1	3.26e-99	4.4e-98
NIPSNAP3A	3.38e-99	4.55e-98
BCL11A	3.41e-99	4.59e-98
VGLL4	3.55e-99	4.78e-98
PAICS	4.76e-99	6.4e-98
CKAP4	5.02e-99	6.74e-98
PLCD4	5.29e-99	7.1e-98
NPB	5.57e-99	7.48e-98
CYHR1	7.52e-99	1.01e-97
B3GNT1	7.84e-99	1.05e-97
RNF24	8.11e-99	1.09e-97
BARX2	9.59e-99	1.28e-97
HAUS1	2.09e-98	2.79e-97
PIEZO2	2.1e-98	2.81e-97
DYNC1H1	2.31e-98	3.08e-97
CHMP5	2.53e-98	3.38e-97
SKA1	2.69e-98	3.58e-97
SCG2	2.72e-98	3.63e-97
TRAPPC4	3.74e-98	4.98e-97
ARL2BP	3.83e-98	5.1e-97
ATP6AP1L	4.53e-98	6.03e-97
CDCA8	5.71e-98	7.58e-97
TXNDC17	6.39e-98	8.49e-97
RPL10	7.57e-98	1e-96
DNAJC4	1.01e-97	1.34e-96
ACOT13	1.14e-97	1.51e-96
FAM127B	1.39e-97	1.84e-96
SCRG1	1.82e-97	2.41e-96
DYRK4	2.03e-97	2.69e-96
ASS1	2.04e-97	2.7e-96
PFKL	2.17e-97	2.86e-96
BAG3	2.49e-97	3.28e-96
TAF12	2.6e-97	3.43e-96
ODF2L	2.94e-97	3.87e-96
RPL3	3.32e-97	4.38e-96
ARGLU1	3.79e-97	4.98e-96
RP11-343N15.5	3.81e-97	5.02e-96
ARHGAP29	4.3e-97	5.66e-96
STIM2	5.15e-97	6.77e-96
GLUL	5.74e-97	7.53e-96
UBE2L6	8.52e-97	1.12e-95
SSR1	1.12e-96	1.47e-95
PLEKHA5	1.2e-96	1.57e-95
SDSL	1.42e-96	1.85e-95
PLAU	1.52e-96	1.99e-95
MSRB2	1.71e-96	2.24e-95
NUDT16L1	1.73e-96	2.26e-95
SPC24	5.79e-96	7.56e-95
JTB	6.28e-96	8.19e-95
MRPL10	6.46e-96	8.42e-95
TGFBI	9.3e-96	1.21e-94
ARF4	1.22e-95	1.58e-94
RP11-660L16.2	1.44e-95	1.87e-94
MPV17	1.63e-95	2.12e-94
CCDC66	2.1e-95	2.73e-94
IMMP1L	2.13e-95	2.77e-94
NDUFB7	2.36e-95	3.06e-94
RABGAP1	2.69e-95	3.49e-94
RPL5	2.87e-95	3.72e-94
ABCC9	3.41e-95	4.41e-94
RASSF7	4.34e-95	5.62e-94
PGAM2	4.42e-95	5.72e-94
ASGR1	4.81e-95	6.22e-94
ARMC10	5.59e-95	7.22e-94
CTDNEP1	5.65e-95	7.29e-94
HSPB3	5.76e-95	7.43e-94
LRRC37B	7.46e-95	9.61e-94
TMEM170A	7.75e-95	9.98e-94
CSRNP1	8.68e-95	1.12e-93
WNK1	1.24e-94	1.59e-93
SLC25A5	1.34e-94	1.72e-93
FGGY	1.36e-94	1.75e-93
GPR162	1.92e-94	2.47e-93
MTCH2	2.95e-94	3.78e-93
MTX2	3.14e-94	4.02e-93
TWF2	3.31e-94	4.24e-93
SRPX	3.37e-94	4.32e-93
FLYWCH2	4.19e-94	5.35e-93
TOX	4.56e-94	5.83e-93
ACO2	4.66e-94	5.95e-93
BCAT2	5.74e-94	7.33e-93
MIAT	6.13e-94	7.82e-93
DCAF7	6.16e-94	7.85e-93
RPS4Y1	6.17e-94	7.87e-93
RBM39	8.72e-94	1.11e-92
TIMMDC1	9.23e-94	1.17e-92
PSMD8	9.38e-94	1.19e-92
RPL34	9.98e-94	1.27e-92
PRRX1	1.03e-93	1.31e-92
ZRANB2	1.15e-93	1.46e-92
EHMT2	2.35e-93	2.98e-92
C11orf49	2.46e-93	3.11e-92
ARL3	2.6e-93	3.29e-92
KIF5C	2.93e-93	3.71e-92
ATP5E	3.18e-93	4.02e-92
TPD52L1	3.51e-93	4.44e-92
DES	3.99e-93	5.04e-92
MRPL52	4.59e-93	5.79e-92
EIF4B	4.71e-93	5.95e-92
PRKCSH	4.74e-93	5.98e-92
TP53TG1	4.79e-93	6.03e-92
KLHDC8B	5.08e-93	6.39e-92
TMEM60	5.58e-93	7.02e-92
ROBO2	6.08e-93	7.64e-92
EFEMP1	7.36e-93	9.25e-92
MRPL42	1.01e-92	1.27e-91
SNRPE	1.13e-92	1.41e-91
CEP19	1.26e-92	1.58e-91
LRRN3	1.27e-92	1.59e-91
PKIG	1.48e-92	1.86e-91
CMAS	1.66e-92	2.07e-91
VDAC1	1.95e-92	2.44e-91
GTSE1	2.16e-92	2.7e-91
PRELID1	2.24e-92	2.8e-91
MAPKAPK5-AS1	2.33e-92	2.91e-91
MAP4K4	2.52e-92	3.15e-91
RUVBL1	2.64e-92	3.29e-91
DCP2	2.75e-92	3.42e-91
TSPAN9	3.35e-92	4.18e-91
HIBCH	4.09e-92	5.09e-91
RPS4X	4.29e-92	5.34e-91
TMOD3	4.72e-92	5.87e-91
PURG	5.05e-92	6.27e-91
YIF1A	6.6e-92	8.2e-91
COL4A1	8.06e-92	1e-90
RAI14	9.2e-92	1.14e-90
NTPCR	1.1e-91	1.37e-90
TMEM132A	1.15e-91	1.43e-90
SPAG7	1.23e-91	1.53e-90
SFRP1	1.26e-91	1.56e-90
RP11-65J3.1	1.3e-91	1.61e-90
PSMD10	1.36e-91	1.67e-90
ZSCAN18	1.36e-91	1.67e-90
RAB4A	2.11e-91	2.6e-90
POLD4	2.46e-91	3.03e-90
HMMR	2.73e-91	3.36e-90
MPZL1	3.48e-91	4.29e-90
SLC25A1	4.96e-91	6.1e-90
ACTR1B	5.84e-91	7.18e-90
EIF3I	6.04e-91	7.42e-90
RNPEP	6.55e-91	8.05e-90
SEPP1	7.56e-91	9.27e-90
COQ5	8.46e-91	1.04e-89
ARID5B	8.86e-91	1.09e-89
APEX1	9.84e-91	1.21e-89
SMIM7	1.3e-90	1.59e-89
CDC42EP1	1.53e-90	1.87e-89
YBEY	1.73e-90	2.12e-89
LRFN5	2.02e-90	2.47e-89
SMPX	2.43e-90	2.97e-89
NDUFB10	2.53e-90	3.09e-89
SRSF3	2.83e-90	3.46e-89
PPP1CA	4.01e-90	4.88e-89
ALDH1A1	4.28e-90	5.21e-89
GTF2H2	4.42e-90	5.38e-89
ATP5D	4.57e-90	5.56e-89
ADAM28	8.14e-90	9.9e-89
IER3IP1.1	9.69e-90	1.18e-88
RBP1	1.01e-89	1.22e-88
CSTF3	1.19e-89	1.44e-88
ERBB3	1.24e-89	1.5e-88
CNP	1.9e-89	2.31e-88
SRI	1.92e-89	2.32e-88
AC116614.1	2.12e-89	2.56e-88
FGFBP3	2.36e-89	2.85e-88
GRB2	2.52e-89	3.05e-88
CRYAB	2.57e-89	3.1e-88
GYG2	3.03e-89	3.66e-88
SCRN3	3.06e-89	3.7e-88
SUV420H2	3.77e-89	4.55e-88
PRCP	4.24e-89	5.1e-88
GRID2	4.97e-89	5.98e-88
FOXP1	5.46e-89	6.57e-88
NIT1	5.88e-89	7.07e-88
ATP6V1G1	5.98e-89	7.19e-88
HMGCL	6.34e-89	7.62e-88
SLC40A1	6.45e-89	7.74e-88
NME3	6.78e-89	8.13e-88
ADH5	6.97e-89	8.36e-88
NHSL1	7.05e-89	8.44e-88
BDH1	7.97e-89	9.54e-88
BCAT1	8.74e-89	1.05e-87
COL23A1	9.73e-89	1.16e-87
GALK1	1.03e-88	1.24e-87
EPN1	1.25e-88	1.49e-87
KNSTRN	1.29e-88	1.55e-87
PCGF2	1.61e-88	1.93e-87
WDR18	1.75e-88	2.08e-87
HSD11B1L	1.98e-88	2.36e-87
LMNB1	2.11e-88	2.52e-87
COA5	2.66e-88	3.17e-87
ACOT7	2.74e-88	3.26e-87
UBB	3.04e-88	3.61e-87
MSX1	3.08e-88	3.66e-87
KIAA1958	3.29e-88	3.91e-87
WDR83OS	3.35e-88	3.98e-87
CDC42EP5	3.79e-88	4.49e-87
SMARCA4	5.73e-88	6.79e-87
PIANP	6.29e-88	7.45e-87
STOML2	6.46e-88	7.65e-87
CHMP2A	7.63e-88	9.03e-87
SMIM15	1.01e-87	1.2e-86
TSEN15	1.02e-87	1.2e-86
BTG2	1.21e-87	1.43e-86
RP11-357H14.17	1.27e-87	1.5e-86
ARHGAP15	1.37e-87	1.62e-86
TSPAN2	1.56e-87	1.84e-86
CAPRIN1	2.41e-87	2.84e-86
CCDC8	2.78e-87	3.27e-86
EGFL6	3.42e-87	4.03e-86
PLXNC1	4.46e-87	5.25e-86
HOXB2	5.66e-87	6.65e-86
CORO1B	6.34e-87	7.44e-86
PNPLA4	6.39e-87	7.5e-86
BMP7	6.91e-87	8.11e-86
NPPC	8.14e-87	9.53e-86
BLMH	9.82e-87	1.15e-85
MRPS12	1.05e-86	1.22e-85
YPEL1	1.12e-86	1.31e-85
ECI2	1.32e-86	1.55e-85
FAM103A1	1.37e-86	1.6e-85
NEBL	1.6e-86	1.87e-85
ATP5J2	1.66e-86	1.93e-85
RPL39L	1.99e-86	2.32e-85
BMPR1B	2.2e-86	2.57e-85
SHROOM3	2.23e-86	2.6e-85
C1orf85	2.24e-86	2.61e-85
SAMD13	2.26e-86	2.63e-85
HOXC6	2.29e-86	2.66e-85
NRP2	2.67e-86	3.1e-85
MTCH1	2.75e-86	3.2e-85
AKIP1	2.82e-86	3.27e-85
TMED2	3.44e-86	3.99e-85
PLAC9	3.48e-86	4.03e-85
SNX5	4.42e-86	5.12e-85
C14orf37	4.92e-86	5.7e-85
DKKL1	6.3e-86	7.29e-85
RANBP1	6.42e-86	7.42e-85
CANX	6.82e-86	7.88e-85
CHD3	8.7e-86	1e-84
SGCA	9.96e-86	1.15e-84
IGFBP7-AS1	1.3e-85	1.5e-84
SLC25A26	1.56e-85	1.8e-84
ARHGAP11B	1.64e-85	1.89e-84
CLHC1	2.02e-85	2.33e-84
XPO1	2.17e-85	2.5e-84
IGFBP7	2.21e-85	2.54e-84
FSCN1	2.26e-85	2.6e-84
STUB1	2.32e-85	2.67e-84
PMS2	2.96e-85	3.4e-84
ACTN1	3.36e-85	3.85e-84
LNPEP	3.51e-85	4.03e-84
LAMC1	3.58e-85	4.11e-84
MEA1	3.73e-85	4.27e-84
ZFAND3	3.88e-85	4.44e-84
RFTN2	3.9e-85	4.46e-84
ELAVL1	4.15e-85	4.74e-84
SNAPC3	5.02e-85	5.74e-84
GORASP2	5.29e-85	6.04e-84
COLGALT2	5.8e-85	6.61e-84
UBL7	5.94e-85	6.77e-84
ARF3	6.03e-85	6.87e-84
IKBIP	6.57e-85	7.49e-84
MOSPD3	6.85e-85	7.79e-84
RPL23A	7.18e-85	8.17e-84
COL4A2	8.26e-85	9.4e-84
DPYSL5	8.9e-85	1.01e-83
BLVRB	9.58e-85	1.09e-83
RNF181	1.06e-84	1.2e-83
FGF13	1.06e-84	1.2e-83
NDUFA8	1.1e-84	1.25e-83
QKI	1.11e-84	1.26e-83
MAD2L1	1.33e-84	1.51e-83
DLK1	1.33e-84	1.51e-83
ADM	1.55e-84	1.75e-83
DKK1	1.68e-84	1.9e-83
TALDO1	1.87e-84	2.11e-83
EIF4A3	1.88e-84	2.12e-83
FAM211A	2.31e-84	2.6e-83
SNRPD2	3.2e-84	3.61e-83
BMP5	3.88e-84	4.38e-83
NAA38	4e-84	4.5e-83
RNF175	4.06e-84	4.57e-83
MMP24-AS1	4.21e-84	4.74e-83
SLC44A1	4.4e-84	4.95e-83
SHISA5	4.66e-84	5.23e-83
SNAPC2	4.68e-84	5.26e-83
ATP6V1D	4.81e-84	5.4e-83
HSP90AB1	5.13e-84	5.75e-83
COX7C	5.28e-84	5.92e-83
BABAM1	5.77e-84	6.47e-83
MIR181A1HG	5.82e-84	6.52e-83
SIGMAR1	7.08e-84	7.92e-83
S100B	7.43e-84	8.32e-83
YES1	7.62e-84	8.52e-83
RP11-317N12.1	9.46e-84	1.06e-82
C19orf10	9.48e-84	1.06e-82
AGAP10	1.03e-83	1.15e-82
ATF7IP	1.08e-83	1.2e-82
APH1A	1.09e-83	1.22e-82
NDUFA11	1.12e-83	1.25e-82
GABARAPL2	1.33e-83	1.48e-82
CTTNBP2NL	1.66e-83	1.85e-82
PTGR1	2.02e-83	2.25e-82
PAIP1	2.21e-83	2.46e-82
C9orf142	2.44e-83	2.71e-82
TMED1	2.87e-83	3.18e-82
ANXA1	3.17e-83	3.52e-82
VIM	3.29e-83	3.65e-82
RPS5	4.03e-83	4.46e-82
CALCRL	4.59e-83	5.08e-82
FKBP7	5.32e-83	5.89e-82
H2AFY	7.63e-83	8.45e-82
FAM118B	8.47e-83	9.36e-82
CRELD2	1.02e-82	1.12e-81
DOK5	1.04e-82	1.15e-81
SAE1	1.05e-82	1.16e-81
PIGX	1.13e-82	1.24e-81
SYT11	1.23e-82	1.35e-81
KCNJ8	1.28e-82	1.41e-81
PJA2	1.28e-82	1.41e-81
RNF182	1.32e-82	1.46e-81
RBPJ	1.46e-82	1.6e-81
DLGAP4	1.84e-82	2.02e-81
SFPQ	1.85e-82	2.03e-81
FBXO16	2.03e-82	2.23e-81
ERLEC1	2.06e-82	2.26e-81
TMEM178A	2.27e-82	2.49e-81
C12orf23	2.42e-82	2.65e-81
BTBD17	2.53e-82	2.77e-81
ZNF638	2.56e-82	2.81e-81
ASNS	2.9e-82	3.17e-81
KCNE1L	2.92e-82	3.19e-81
ZCCHC18	2.99e-82	3.27e-81
TMEM97	3.11e-82	3.4e-81
EGLN2	3.32e-82	3.62e-81
EPHB2	3.39e-82	3.7e-81
CEP57	4.01e-82	4.37e-81
NUDT5	5.16e-82	5.63e-81
WIPI2	5.61e-82	6.11e-81
CFD	5.88e-82	6.41e-81
TRIM5	6.15e-82	6.69e-81
SNX10	7.72e-82	8.4e-81
LRRC27	8.87e-82	9.64e-81
FDPS	8.98e-82	9.76e-81
INTU	1.68e-81	1.82e-80
MLF2	1.91e-81	2.07e-80
CYB5B	2.01e-81	2.18e-80
VOPP1	2.29e-81	2.48e-80
NKIRAS2	2.6e-81	2.82e-80
KDELC1	2.97e-81	3.22e-80
ARPC1B	3.3e-81	3.57e-80
TUSC2	4e-81	4.33e-80
SUCLG1	5.4e-81	5.84e-80
TPD52L2	6.43e-81	6.95e-80
PVRL1	7.17e-81	7.74e-80
LFNG	7.46e-81	8.05e-80
FAM69B	8.1e-81	8.74e-80
KCNMB2	9.07e-81	9.78e-80
UQCRFS1	9.91e-81	1.07e-79
TCN2	1.33e-80	1.43e-79
C19orf82	1.35e-80	1.45e-79
FAM101A	1.51e-80	1.62e-79
TXN2	1.51e-80	1.63e-79
DPP10	1.56e-80	1.67e-79
ATP6V0E2	1.67e-80	1.79e-79
TMEM258	1.83e-80	1.97e-79
NPEPPS	2.37e-80	2.54e-79
DDIT4L	2.67e-80	2.86e-79
C11orf48	2.67e-80	2.86e-79
TNMD	3.08e-80	3.3e-79
GNAI2	3.41e-80	3.65e-79
MBOAT7	4.42e-80	4.72e-79
SLC25A3	5.03e-80	5.37e-79
FBXO22	5.67e-80	6.06e-79
CHEK1	7.78e-80	8.31e-79
NSUN7	8.8e-80	9.39e-79
PGM1	1.07e-79	1.14e-78
SRD5A1	1.18e-79	1.26e-78
CIAPIN1	1.18e-79	1.26e-78
URM1	1.2e-79	1.28e-78
SMIM14	1.23e-79	1.3e-78
CDK2AP2	1.28e-79	1.36e-78
NPTX2	1.31e-79	1.4e-78
VLDLR	1.58e-79	1.68e-78
MTRNR2L1	2.01e-79	2.14e-78
LMAN2	2.07e-79	2.19e-78
SLC38A5	2.14e-79	2.27e-78
NBPF14	2.31e-79	2.45e-78
COMMD10	2.36e-79	2.5e-78
UBA52	2.48e-79	2.62e-78
RPL38	2.75e-79	2.91e-78
IL1RAPL1	2.92e-79	3.09e-78
WRB	2.94e-79	3.11e-78
ETHE1	2.96e-79	3.13e-78
TOMM22	3.64e-79	3.85e-78
XPNPEP1	3.72e-79	3.93e-78
CDCA7	4.29e-79	4.53e-78
MORF4L1	4.42e-79	4.66e-78
HLA-A	4.86e-79	5.12e-78
CLEC3A	4.96e-79	5.22e-78
DRAXIN	5.05e-79	5.31e-78
FAM101B	5.1e-79	5.37e-78
LYPLA1	5.43e-79	5.71e-78
SEC61A1	5.83e-79	6.13e-78
CBX8	5.93e-79	6.23e-78
S100A13	6.41e-79	6.73e-78
C9orf116	7.02e-79	7.37e-78
DHFR	7.07e-79	7.41e-78
STAG2	8.92e-79	9.35e-78
MRFAP1	9.17e-79	9.6e-78
CAMK2D	1.09e-78	1.15e-77
NDUFAF3	1.15e-78	1.2e-77
TEAD1	1.18e-78	1.23e-77
CDIPT	1.21e-78	1.27e-77
CTSC	1.38e-78	1.45e-77
GOLGA7	1.46e-78	1.52e-77
MIR22HG	1.76e-78	1.84e-77
COL25A1	1.96e-78	2.05e-77
RP11-498P14.5	2.28e-78	2.37e-77
KIF2A	2.65e-78	2.76e-77
RGS11	2.67e-78	2.78e-77
RP11-329B9.4	3.02e-78	3.14e-77
ARPC4	3.04e-78	3.16e-77
FBXL2	3.24e-78	3.37e-77
CTSB	3.43e-78	3.56e-77
TRAM1	3.93e-78	4.09e-77
CISD1	4.17e-78	4.33e-77
CCDC124	4.21e-78	4.37e-77
ACN9	4.24e-78	4.4e-77
TNFRSF19	4.75e-78	4.92e-77
NEIL3	5.04e-78	5.22e-77
YWHAE	5.09e-78	5.27e-77
RCC1	5.51e-78	5.7e-77
PAK2	6.14e-78	6.35e-77
LAMTOR1	6.52e-78	6.73e-77
LINC00657	6.71e-78	6.92e-77
PDRG1	7.43e-78	7.67e-77
CHN1	7.99e-78	8.25e-77
CHP1	8.02e-78	8.27e-77
LPHN1	8.56e-78	8.82e-77
TMEM126B	1.13e-77	1.17e-76
ZMAT5	1.14e-77	1.18e-76
ZMYM2	1.2e-77	1.23e-76
FAM60A	1.26e-77	1.3e-76
GMPR2	1.29e-77	1.32e-76
ARL5A	1.44e-77	1.48e-76
BTF3L4	2.03e-77	2.09e-76
RP11-417E7.2	2.06e-77	2.11e-76
MGST3	2.55e-77	2.61e-76
SNRPC	2.55e-77	2.62e-76
CHD9	2.57e-77	2.63e-76
MIB1	3.56e-77	3.65e-76
ZNF93	3.78e-77	3.87e-76
SRSF9	4.45e-77	4.55e-76
TSC22D4	4.66e-77	4.76e-76
BRD3	4.67e-77	4.77e-76
COPB1	5.61e-77	5.73e-76
COL8A1	5.71e-77	5.82e-76
LAMP5	6.44e-77	6.57e-76
NAA10	7.75e-77	7.9e-76
RP11-142I20.1	9.71e-77	9.89e-76
AMT	1.05e-76	1.07e-75
ARID3A	1.14e-76	1.16e-75
SHC1	1.15e-76	1.17e-75
RNMT	1.28e-76	1.3e-75
HNRNPM	1.34e-76	1.36e-75
LAMTOR4	1.36e-76	1.38e-75
SLC25A11	1.44e-76	1.46e-75
FAM136A	1.46e-76	1.48e-75
BOK	1.46e-76	1.49e-75
TUFM	2.59e-76	2.62e-75
NKTR	3.14e-76	3.18e-75
TMEM106B	3.43e-76	3.47e-75
C18orf56	4.12e-76	4.17e-75
SRP14	4.19e-76	4.24e-75
CTD-3064H18.1	4.4e-76	4.45e-75
EPRS	4.47e-76	4.52e-75
ADAM12	5.24e-76	5.29e-75
BROX	5.51e-76	5.56e-75
CNN3	5.61e-76	5.66e-75
GLT8D2	5.86e-76	5.91e-75
MESDC2	6.61e-76	6.66e-75
SLN	9.85e-76	9.92e-75
STRBP	1.1e-75	1.11e-74
RP11-139H15.1	1.31e-75	1.32e-74
TRIM44	1.37e-75	1.38e-74
F12	1.54e-75	1.55e-74
ERRFI1	1.68e-75	1.69e-74
RPL10A	1.9e-75	1.91e-74
MAZ	2.02e-75	2.02e-74
FAM96B	2.02e-75	2.03e-74
HMGCLL1	2.45e-75	2.45e-74
TXN	2.51e-75	2.51e-74
STAU1	4.26e-75	4.26e-74
BLOC1S1	5.46e-75	5.47e-74
SAP18	5.82e-75	5.82e-74
RP11-115C21.2	6.23e-75	6.23e-74
CACNG1	6.81e-75	6.8e-74
MMP11	7.05e-75	7.04e-74
OPN3	7.87e-75	7.85e-74
KLHL4	8.85e-75	8.83e-74
DCAKD	9.13e-75	9.1e-74
GDF10	9.8e-75	9.77e-74
RNASEH2C	1.14e-74	1.14e-73
EMC6	1.22e-74	1.22e-73
TSPAN12	1.23e-74	1.22e-73
TTC37	1.37e-74	1.36e-73
PEA15	1.41e-74	1.41e-73
HIGD2A	1.58e-74	1.57e-73
WDR34	1.81e-74	1.8e-73
FOXK1	1.89e-74	1.88e-73
PSMA1	2.21e-74	2.19e-73
NDUFA3	2.29e-74	2.27e-73
ATG12	2.83e-74	2.81e-73
COX16	2.98e-74	2.95e-73
CDIP1	3.01e-74	2.98e-73
HHIP	3.44e-74	3.41e-73
AGRN	3.87e-74	3.83e-73
COPS6	4.17e-74	4.13e-73
RNF167	5.65e-74	5.58e-73
TSTA3	5.81e-74	5.74e-73
MRPL27	6.03e-74	5.95e-73
NRBP1	6.8e-74	6.71e-73
RASA4	8.63e-74	8.51e-73
OBSL1	8.72e-74	8.59e-73
PPM1G	9.4e-74	9.26e-73
RAB18	1.04e-73	1.03e-72
NTHL1	1.13e-73	1.11e-72
COA4	1.49e-73	1.46e-72
KRT10	1.52e-73	1.5e-72
THAP2	1.78e-73	1.75e-72
MDH1	1.78e-73	1.75e-72
C19orf81	2.01e-73	1.97e-72
WDYHV1	2.06e-73	2.02e-72
HOMER3	2.58e-73	2.53e-72
PRRC1	2.6e-73	2.55e-72
ZNF322	3.24e-73	3.17e-72
TCF4	3.51e-73	3.44e-72
PIH1D1	3.85e-73	3.77e-72
ST13	3.95e-73	3.87e-72
C20orf112	4.86e-73	4.75e-72
EIF4A2	5.45e-73	5.33e-72
MTRNR2L8	5.73e-73	5.6e-72
TRAF4	6.04e-73	5.89e-72
COL8A2	6.44e-73	6.28e-72
EFNA5	6.89e-73	6.72e-72
GFAP	6.92e-73	6.74e-72
ACTB	6.94e-73	6.76e-72
SPECC1	7.58e-73	7.38e-72
RARS	7.65e-73	7.45e-72
SNRNP70	7.8e-73	7.58e-72
RRAD	8.92e-73	8.67e-72
AZI2	9.83e-73	9.55e-72
R3HDM1	1.15e-72	1.12e-71
TRIP6	1.19e-72	1.15e-71
GPI	1.43e-72	1.39e-71
LRIG3	1.57e-72	1.52e-71
APAF1	2.06e-72	1.99e-71
SHD	2.28e-72	2.21e-71
MSI1	2.48e-72	2.4e-71
PENK	2.57e-72	2.48e-71
PALLD	3.22e-72	3.11e-71
RPS19BP1	3.24e-72	3.13e-71
MCM10	3.5e-72	3.38e-71
SNX24	3.62e-72	3.49e-71
C2orf68	4.09e-72	3.94e-71
TMEM107	4.32e-72	4.17e-71
DAB1	4.45e-72	4.29e-71
ATAD2	6.28e-72	6.05e-71
INHBE	6.52e-72	6.28e-71
RPUSD3	6.62e-72	6.38e-71
CRYZL1	6.98e-72	6.71e-71
SCARF2	7.58e-72	7.29e-71
[truncated: 17,230 more rows]
